# Supplementary material
Source: Research Square preprint supplement (doi:10.21203/rs.3.rs-9082112/v1)
Supplement: Supplementary file 1 [file 607541f87b28b789b5057c3a.pdf]

| <b>DATE</b> | <b>ESG USA</b> | <b>ESG GLOBAL</b> | <b>SOUTHERN AFRICA</b> | <b>NORTH AFRICA</b> | <b>WEST AFRICA</b> | <b>EAST AFRICA</b> |
|-------------|----------------|-------------------|------------------------|---------------------|--------------------|--------------------|
|             | \$             | \$                | \$                     | \$                  | \$                 | \$                 |
| 2/2/2015    | 1.247          | 1.014             | -0.217                 | -0.127              | -0.038             | 0.105              |
| 2/3/2015    | 1.317          | 1.291             | 0.240                  | 0.871               | 1.313              | 0.448              |
| 2/4/2015    | -0.146         | 0.014             | 0.266                  | 0.801               | 1.500              | 0.332              |
| 2/5/2015    | 1.000          | 0.643             | 0.088                  | -0.454              | -1.347             | 0.417              |
| 2/6/2015    | -0.299         | -0.414            | -0.047                 | -0.074              | -2.832             | -0.201             |
| 2/9/2015    | -0.466         | -0.351            | -0.592                 | -0.644              | -3.642             | 0.077              |
| 2/10/2015   | 1.187          | 0.608             | -0.060                 | 0.233               | -2.609             | 0.006              |
| 2/11/2015   | -0.010         | -0.314            | -0.621                 | -0.796              | -3.017             | 0.547              |
| 2/12/2015   | 0.944          | 1.088             | -0.026                 | -0.244              | -3.124             | 0.404              |
| 2/13/2015   | 0.280          | 0.677             | 0.318                  | 0.182               | -0.407             | 0.054              |
| 2/17/2015   | 0.222          | 0.147             | 0.461                  | -2.144              | 5.049              | 0.967              |
| 2/18/2015   | 0.027          | 0.203             | -0.018                 | 0.455               | 3.691              | 0.613              |
| 2/19/2015   | -0.149         | 0.007             | 0.206                  | 0.228               | 0.310              | 0.813              |
| 2/20/2015   | 0.661          | 0.398             | -0.053                 | 0.043               | 0.323              | 0.135              |
| 2/23/2015   | 0.084          | 0.146             | 0.372                  | 0.722               | 1.829              | -0.168             |
| 2/24/2015   | 0.229          | 0.348             | -0.077                 | 0.056               | 1.125              | 0.538              |
| 2/25/2015   | -0.229         | 0.042             | 0.130                  | -0.519              | 0.598              | 0.199              |
| 2/26/2015   | -0.035         | -0.146            | 0.263                  | -1.318              | -1.618             | -1.145             |
| 2/27/2015   | -0.310         | -0.076            | -0.945                 | -0.097              | 0.224              | -0.350             |
| 3/2/2015    | 0.692          | 0.181             | -0.289                 | 0.676               | 1.711              | -0.584             |
| 3/3/2015    | -0.515         | -0.508            | -0.467                 | -0.002              | 2.106              | -0.990             |
| 3/4/2015    | -0.447         | -0.440            | -0.633                 | -0.216              | -0.442             | -0.056             |
| 3/5/2015    | 0.035          | 0.070             | -0.276                 | 0.646               | -1.268             | -0.532             |
| 3/6/2015    | -1.381         | -1.226            | -1.097                 | -0.380              | 4.660              | 0.050              |
| 3/9/2015    | 0.450          | -0.064            | -0.791                 | 0.881               | 0.459              | -0.735             |
| 3/10/2015   | -1.728         | -1.746            | -0.880                 | -0.425              | 0.687              | 0.321              |
| 3/11/2015   | -0.261         | -0.137            | -0.569                 | -1.212              | -2.266             | 0.108              |
| 3/12/2015   | 1.343          | 1.000             | -0.046                 | 0.538               | 0.459              | -0.051             |
| 3/13/2015   | -0.475         | -0.517            | -1.406                 | -0.145              | -0.771             | -0.012             |
| 3/16/2015   | 1.311          | 1.137             | -0.331                 | -0.887              | -3.297             | -0.475             |
| 3/17/2015   | -0.300         | -0.157            | -0.186                 | 0.441               | -2.835             | 0.280              |
| 3/18/2015   | 1.097          | 1.027             | -0.212                 | -0.780              | -0.687             | 0.823              |
| 3/19/2015   | -0.455         | -0.212            | 0.374                  | -0.031              | -0.512             | 0.700              |
| 3/20/2015   | 0.913          | 1.347             | -0.126                 | 0.835               | 0.960              | -0.704             |
| 3/23/2015   | -0.167         | 0.237             | 0.280                  | -0.589              | 0.479              | -0.510             |
| 3/24/2015   | -0.714         | -0.299            | 0.474                  | -0.155              | 0.373              | 0.335              |
| 3/25/2015   | -1.558         | -0.869            | 0.410                  | -0.939              | 1.642              | 0.354              |
| 3/26/2015   | -0.268         | -0.699            | -0.032                 | -1.443              | 1.380              | -0.081             |
| 3/27/2015   | 0.254          | -0.057            | -0.069                 | -0.078              | 1.907              | 0.379              |
| 3/30/2015   | 1.245          | 0.749             | -0.973                 | 0.471               | 1.146              | 0.435              |
| 3/31/2015   | -0.808         | -0.876            | -0.096                 | -0.392              | 2.366              | -0.348             |
| 4/1/2015    | -0.431         | -0.142            | 0.633                  | -0.482              | 7.678              | -0.007             |
| 4/2/2015    | 0.306          | 0.624             | 0.139                  | -1.378              | 4.714              | -1.479             |
| 4/6/2015    | 0.579          | 0.879             | 0.349                  | -2.219              | 0.000              | 0.000              |
| 4/7/2015    | -0.251         | 0.000             | -0.052                 | 0.647               | 0.000              | 0.000              |

|           |        |        |        |        |        |        |
|-----------|--------|--------|--------|--------|--------|--------|
| 4/8/2015  | 0.325  | 0.084  | 0.092  | 0.248  | -2.500 | -0.113 |
| 4/9/2015  | 0.448  | 0.293  | -0.440 | 0.572  | 0.682  | -0.689 |
| 4/10/2015 | 0.382  | 0.494  | 0.241  | -0.363 | 1.811  | -0.058 |
| 4/13/2015 | -0.429 | -0.348 | -0.160 | -0.037 | 1.198  | 0.422  |
| 4/14/2015 | 0.072  | 0.424  | 0.301  | 0.533  | -0.580 | 0.229  |
| 4/15/2015 | 0.534  | 0.270  | -0.743 | -0.324 | -0.576 | -0.317 |
| 4/16/2015 | -0.096 | 0.166  | 0.311  | 0.141  | -0.338 | 0.267  |
| 4/17/2015 | -1.142 | -0.999 | 0.025  | 0.197  | 1.187  | 0.571  |
| 4/20/2015 | 1.004  | 0.626  | 0.227  | -2.146 | 0.236  | 0.022  |
| 4/21/2015 | -0.194 | 0.139  | -0.159 | -0.265 | -1.140 | -0.256 |
| 4/22/2015 | 0.599  | 0.304  | -0.266 | 0.460  | 0.593  | -1.013 |
| 4/23/2015 | 0.203  | 0.324  | -0.039 | 0.937  | -0.758 | -0.138 |
| 4/24/2015 | 0.460  | 0.583  | 0.049  | 0.042  | -0.090 | -0.004 |
| 4/27/2015 | -0.342 | 0.164  | 1.025  | -1.289 | -0.275 | -0.239 |
| 4/28/2015 | 0.275  | 0.150  | 0.784  | -0.927 | -0.898 | -0.344 |
| 4/29/2015 | -0.383 | -0.430 | 0.977  | 1.684  | -0.340 | 0.063  |
| 4/30/2015 | -1.027 | -0.949 | 0.076  | 1.180  | 1.003  | 0.420  |
| 5/1/2015  | 1.102  | 0.531  | 0.000  | 0.000  | 0.000  | 0.000  |
| 5/4/2015  | 0.311  | 0.179  | 0.000  | 0.000  | 0.000  | 0.000  |
| 5/5/2015  | -1.164 | -0.952 | -0.019 | 1.140  | -0.602 | 0.143  |
| 5/6/2015  | -0.500 | -0.069 | 0.350  | -0.334 | -0.308 | -0.832 |
| 5/7/2015  | 0.410  | -0.250 | 0.230  | -0.533 | 0.275  | -1.565 |
| 5/8/2015  | 1.380  | 1.456  | -0.133 | -0.061 | -0.522 | 0.292  |
| 5/11/2015 | -0.415 | -0.350 | -0.729 | -0.321 | -0.315 | -1.333 |
| 5/12/2015 | -0.327 | -0.248 | 0.287  | 0.086  | -0.885 | -1.375 |
| 5/13/2015 | -0.029 | 0.213  | 0.940  | -0.921 | 0.701  | -0.971 |
| 5/14/2015 | 1.028  | 0.815  | 0.709  | -1.413 | 0.568  | 0.657  |
| 5/15/2015 | 0.108  | 0.191  | 0.262  | 0.203  | 0.498  | 0.219  |
| 5/18/2015 | 0.348  | 0.027  | 0.138  | 3.398  | 1.503  | -0.510 |
| 5/19/2015 | 0.014  | -0.225 | -0.358 | -0.051 | 0.179  | 0.003  |
| 5/20/2015 | -0.138 | -0.020 | -0.110 | -0.656 | -0.879 | -0.157 |
| 5/21/2015 | 0.195  | 0.334  | -0.044 | 0.666  | -0.296 | -1.106 |
| 5/22/2015 | -0.225 | -0.382 | 0.124  | -0.698 | -0.604 | -1.067 |
| 5/26/2015 | -1.031 | -1.216 | -1.382 | -0.513 | -0.277 | -1.597 |
| 5/27/2015 | 1.006  | 0.702  | -0.329 | -0.242 | 0.166  | -1.000 |
| 5/28/2015 | -0.126 | -0.179 | -0.422 | -0.135 | -0.492 | 0.206  |
| 5/29/2015 | -0.579 | -0.704 | 0.243  | 0.442  | 0.000  | 0.514  |
| 6/1/2015  | 0.194  | -0.042 | -0.064 | -1.273 | -1.162 | 0.000  |
| 6/2/2015  | -0.176 | 0.235  | -0.014 | 1.273  | 0.267  | 0.000  |
| 6/3/2015  | 0.251  | 0.421  | 0.381  | 0.611  | -1.348 | 0.669  |
| 6/4/2015  | -0.839 | -0.773 | 0.472  | -0.771 | -1.626 | 0.839  |
| 6/5/2015  | -0.169 | -0.863 | -0.478 | -0.347 | 1.226  | -1.200 |
| 6/8/2015  | -0.659 | -0.463 | -0.028 | -0.302 | -0.228 | -1.722 |
| 6/9/2015  | 0.042  | -0.028 | 0.451  | -0.422 | -0.339 | 0.558  |
| 6/10/2015 | 1.154  | 1.410  | 0.288  | -0.056 | -0.555 | 0.277  |
| 6/11/2015 | 0.222  | 0.180  | -0.162 | -0.229 | 0.614  | 0.001  |
| 6/12/2015 | -0.703 | -0.534 | -0.370 | 0.374  | 0.300  | 0.008  |

|           |        |        |        |        |        |        |
|-----------|--------|--------|--------|--------|--------|--------|
| 6/15/2015 | -0.426 | -0.761 | -0.057 | -0.884 | 0.118  | -0.288 |
| 6/16/2015 | 0.600  | 0.350  | 0.244  | -0.097 | -0.071 | -0.203 |
| 6/17/2015 | 0.202  | -0.091 | -0.110 | -0.186 | -0.361 | -0.578 |
| 6/18/2015 | 0.952  | 1.001  | 1.118  | 0.716  | 0.061  | -0.309 |
| 6/19/2015 | -0.592 | -0.388 | 0.084  | -0.016 | -0.621 | -0.801 |
| 6/22/2015 | 0.640  | 1.243  | -0.006 | -0.498 | 0.432  | 0.312  |
| 6/23/2015 | 0.046  | 0.027  | -0.728 | -0.552 | -0.007 | -0.861 |
| 6/24/2015 | -0.717 | -0.495 | -0.164 | -0.014 | -0.259 | 0.517  |
| 6/25/2015 | -0.252 | -0.283 | 0.238  | -0.272 | -0.975 | -0.175 |
| 6/26/2015 | -0.032 | -0.242 | -0.419 | -0.249 | -0.182 | 0.043  |
| 6/29/2015 | -2.116 | -2.263 | -0.794 | -0.557 | 1.352  | 0.087  |
| 6/30/2015 | 0.211  | -0.142 | 0.787  | 0.095  | -0.400 | 0.243  |
| 7/1/2015  | 0.818  | 0.644  | -1.053 | -0.244 | -1.172 | -1.280 |
| 7/2/2015  | -0.069 | -0.021 | -0.428 | -1.075 | -0.421 | -1.027 |
| 7/6/2015  | -0.370 | -1.171 | -0.457 | -3.709 | -0.365 | -0.939 |
| 7/7/2015  | 0.514  | -0.357 | -0.194 | -1.255 | -0.410 | -0.266 |
| 7/8/2015  | -1.669 | -1.116 | -0.232 | -1.299 | -0.605 | -0.854 |
| 7/9/2015  | 0.104  | 0.650  | -0.137 | 0.521  | -1.120 | -0.890 |
| 7/10/2015 | 1.229  | 1.556  | 0.300  | 0.540  | -0.041 | -1.081 |
| 7/13/2015 | 1.090  | 0.889  | -0.222 | -0.369 | -1.058 | -0.108 |
| 7/14/2015 | 0.412  | 0.497  | 0.054  | 0.637  | -0.609 | -0.060 |
| 7/15/2015 | 0.047  | -0.084 | -0.036 | 1.347  | -0.681 | -0.199 |
| 7/16/2015 | 0.746  | 0.773  | -0.090 | 0.959  | 0.542  | -1.710 |
| 7/17/2015 | -0.209 | -0.201 | -0.238 | 0.000  | 0.045  | -0.169 |
| 7/20/2015 | 0.171  | 0.104  | 0.008  | 0.000  | -0.045 | 0.281  |
| 7/21/2015 | -0.338 | -0.229 | 0.109  | 0.262  | 0.526  | 1.026  |
| 7/22/2015 | -0.325 | -0.699 | 0.438  | -0.007 | -0.958 | 0.545  |
| 7/23/2015 | -0.533 | -0.239 | 0.073  | 0.409  | -0.320 | -1.196 |
| 7/24/2015 | -0.933 | -1.031 | -0.055 | 0.013  | 0.169  | -1.230 |
| 7/27/2015 | -0.519 | -0.727 | 0.544  | -1.046 | -1.014 | -0.668 |
| 7/28/2015 | 1.020  | 0.755  | 0.506  | 0.297  | -0.871 | -0.788 |
| 7/29/2015 | 0.676  | 0.813  | 0.235  | 1.199  | -1.082 | -0.289 |
| 7/30/2015 | 0.045  | -0.092 | -0.008 | 0.464  | -0.562 | -1.469 |
| 7/31/2015 | -0.066 | 0.274  | 0.471  | 0.347  | -1.070 | -1.632 |
| 8/3/2015  | -0.224 | -0.317 | -0.331 | -0.568 | -0.047 | -0.402 |
| 8/4/2015  | -0.292 | -0.183 | 0.125  | 1.058  | 1.327  | -0.196 |
| 8/5/2015  | 0.208  | 0.176  | -0.524 | -1.081 | 2.297  | -0.003 |
| 8/6/2015  | -0.882 | -0.608 | 0.186  | 0.003  | -0.027 | 0.208  |
| 8/7/2015  | -0.113 | -0.298 | -0.373 | -0.121 | -0.439 | 3.466  |
| 8/10/2015 | 1.252  | 1.097  | -0.286 | -0.620 | -0.799 | 1.705  |
| 8/11/2015 | -1.194 | -1.111 | -0.254 | 0.380  | 0.113  | 0.930  |
| 8/12/2015 | -0.033 | -0.471 | -0.065 | -0.793 | -1.342 | -0.474 |
| 8/13/2015 | -0.053 | -0.043 | 0.090  | -0.603 | -1.749 | -2.074 |
| 8/14/2015 | 0.442  | 0.136  | -0.172 | -0.052 | -0.008 | -0.937 |
| 8/17/2015 | 0.580  | 0.235  | -0.319 | -2.897 | -1.464 | -0.587 |
| 8/18/2015 | -0.288 | -0.243 | -0.413 | -1.529 | -0.843 | -0.650 |
| 8/19/2015 | -0.765 | -1.056 | -0.210 | -1.356 | -1.380 | -0.998 |

|            |        |        |        |        |        |        |
|------------|--------|--------|--------|--------|--------|--------|
| 8/20/2015  | -2.088 | -1.652 | -0.367 | -0.281 | 0.599  | -0.733 |
| 8/21/2015  | -3.196 | -2.798 | -0.467 | 0.235  | -0.311 | -0.505 |
| 8/24/2015  | -4.092 | -3.854 | -0.537 | -3.779 | -1.489 | -2.377 |
| 8/25/2015  | -1.522 | -0.291 | 0.054  | 0.516  | -2.074 | -2.589 |
| 8/26/2015  | 3.811  | 2.025  | -0.340 | -0.003 | -1.646 | -2.478 |
| 8/27/2015  | 2.321  | 2.151  | -0.473 | 1.647  | 0.039  | -1.982 |
| 8/28/2015  | -0.018 | 0.377  | -0.388 | -0.006 | 3.396  | 2.157  |
| 8/31/2015  | -0.818 | -0.701 | -0.414 | 1.531  | 3.825  | 2.231  |
| 9/1/2015   | -3.016 | -2.771 | -0.043 | -0.813 | 2.100  | 0.114  |
| 9/2/2015   | 1.797  | 0.914  | 0.320  | -0.610 | -1.776 | -0.916 |
| 9/3/2015   | 0.162  | 0.469  | -1.105 | 1.327  | -0.386 | 1.083  |
| 9/4/2015   | -1.600 | -1.734 | -0.653 | -0.008 | 1.438  | -0.969 |
| 9/8/2015   | 2.566  | 1.987  | 0.209  | -2.697 | 3.406  | 1.832  |
| 9/9/2015   | -1.453 | 0.077  | -0.265 | 1.058  | -3.120 | 0.519  |
| 9/10/2015  | 0.501  | -0.199 | -0.176 | 0.150  | -1.693 | 0.582  |
| 9/11/2015  | 0.454  | 0.092  | 0.358  | -0.014 | 1.181  | 0.389  |
| 9/14/2015  | -0.361 | -0.353 | 0.083  | 1.156  | 2.417  | 0.719  |
| 9/15/2015  | 1.250  | 0.895  | -0.216 | -0.226 | 0.201  | 0.802  |
| 9/16/2015  | 0.806  | 1.324  | 0.219  | 0.851  | 0.000  | 0.093  |
| 9/17/2015  | -0.348 | -0.120 | -0.403 | -0.413 | 0.599  | -0.811 |
| 9/18/2015  | -1.497 | -1.387 | 0.158  | -0.409 | 0.458  | -0.243 |
| 9/21/2015  | 0.423  | -0.084 | -0.204 | -0.322 | -0.399 | -0.555 |
| 9/22/2015  | -1.169 | -1.702 | -0.777 | 0.557  | -0.200 | -0.138 |
| 9/23/2015  | -0.093 | -0.303 | -0.841 | 0.620  | 0.472  | 0.340  |
| 9/24/2015  | -0.367 | -0.555 | -0.106 | 0.000  | 0.000  | 0.889  |
| 9/25/2015  | 0.045  | 0.570  | -0.486 | 0.000  | 0.000  | 0.353  |
| 9/28/2015  | -2.602 | -2.102 | -1.098 | 0.000  | 0.862  | -0.385 |
| 9/29/2015  | 0.127  | -0.502 | 0.118  | -0.667 | -0.580 | -1.175 |
| 9/30/2015  | 1.834  | 1.956  | 0.523  | -0.233 | 0.086  | 0.406  |
| 10/1/2015  | 0.238  | 0.321  | 0.198  | -0.160 | 0.038  | -0.784 |
| 10/2/2015  | 1.280  | 1.158  | -0.479 | 0.253  | -0.699 | -1.180 |
| 10/5/2015  | 1.645  | 1.913  | 0.386  | -1.021 | -0.100 | 0.911  |
| 10/6/2015  | -0.487 | 0.257  | 0.314  | -0.191 | 0.391  | -0.512 |
| 10/7/2015  | 0.707  | 0.813  | 0.320  | 0.655  | -1.611 | -0.124 |
| 10/8/2015  | 0.754  | 0.598  | -0.175 | 1.169  | -0.337 | -0.207 |
| 10/9/2015  | 0.125  | 0.602  | 0.286  | 0.485  | 0.514  | -0.375 |
| 10/12/2015 | 0.109  | 0.081  | 0.059  | 1.295  | 0.384  | -0.881 |
| 10/13/2015 | -0.658 | -0.773 | -0.050 | -0.030 | -0.144 | -1.297 |
| 10/14/2015 | -0.558 | -0.516 | -0.009 | 0.322  | -1.194 | -3.301 |
| 10/15/2015 | 1.490  | 1.356  | 0.201  | -1.431 | -0.102 | 0.371  |
| 10/16/2015 | 0.422  | 0.480  | -0.409 | -0.045 | 1.108  | 1.385  |
| 10/19/2015 | 0.107  | -0.184 | -0.115 | -0.723 | 0.123  | 1.369  |
| 10/20/2015 | -0.069 | -0.089 | 0.025  | 0.374  | 0.101  | 0.000  |
| 10/21/2015 | -0.588 | -0.237 | -0.186 | -0.071 | 0.586  | 0.000  |
| 10/22/2015 | 1.536  | 1.075  | -0.204 | -1.008 | -0.211 | 0.198  |
| 10/23/2015 | 1.201  | 1.042  | -0.382 | -0.115 | -0.364 | -0.033 |
| 10/26/2015 | -0.176 | -0.181 | 0.089  | -0.234 | -0.841 | 0.089  |

|            |        |        |        |        |        |        |
|------------|--------|--------|--------|--------|--------|--------|
| 10/27/2015 | -0.169 | -0.517 | -0.272 | -0.470 | -1.215 | -0.641 |
| 10/28/2015 | 1.313  | 1.031  | 0.004  | -0.378 | -0.915 | 0.182  |
| 10/29/2015 | -0.142 | -0.485 | -0.561 | 0.139  | -0.306 | 0.652  |
| 10/30/2015 | -0.594 | -0.131 | 0.024  | 0.177  | -0.502 | -1.303 |
| 11/2/2015  | 1.073  | 0.565  | 0.130  | -0.531 | 0.110  | -0.341 |
| 11/3/2015  | 0.266  | 0.224  | 0.084  | -0.077 | -0.685 | -0.117 |
| 11/4/2015  | -0.457 | -0.209 | -0.295 | -0.127 | -0.014 | 0.036  |
| 11/5/2015  | -0.117 | -0.137 | -0.085 | 0.886  | -0.179 | 1.260  |
| 11/6/2015  | 0.082  | -0.348 | -0.360 | -0.289 | 0.901  | 0.764  |
| 11/9/2015  | -0.912 | -0.824 | -1.083 | -3.118 | 0.130  | 0.397  |
| 11/10/2015 | 0.055  | -0.103 | -0.125 | -2.743 | -1.159 | 0.069  |
| 11/11/2015 | -0.347 | 0.081  | 0.389  | 1.488  | 0.270  | 0.842  |
| 11/12/2015 | -1.339 | -1.193 | 0.008  | 0.061  | -1.196 | 0.490  |
| 11/13/2015 | -1.205 | -1.140 | -0.617 | 0.122  | 0.462  | -0.755 |
| 11/16/2015 | 1.391  | 0.739  | -0.041 | -3.126 | -1.489 | 0.501  |
| 11/17/2015 | -0.199 | 0.505  | -0.664 | -0.974 | -1.214 | 0.466  |
| 11/18/2015 | 1.655  | 0.899  | 0.207  | -0.022 | -0.460 | 0.284  |
| 11/19/2015 | -0.009 | 0.571  | 0.253  | 1.785  | -0.151 | 1.052  |
| 11/20/2015 | 0.396  | 0.124  | -0.908 | -0.231 | -0.356 | 0.237  |
| 11/23/2015 | -0.246 | -0.358 | -0.753 | -1.573 | -1.400 | 0.541  |
| 11/24/2015 | 0.094  | -0.124 | 0.147  | -1.053 | -0.780 | -0.790 |
| 11/25/2015 | -0.001 | 0.110  | -0.069 | 0.593  | 0.780  | 0.078  |
| 11/27/2015 | 0.062  | 0.102  | 0.189  | 0.116  | -0.514 | -1.511 |
| 11/30/2015 | -0.495 | -0.366 | -0.636 | -0.415 | -0.161 | -0.088 |
| 12/1/2015  | 1.057  | 0.905  | -0.400 | 0.804  | -1.325 | -0.068 |
| 12/2/2015  | -1.057 | -0.810 | -0.386 | 1.765  | 0.086  | 0.369  |
| 12/3/2015  | -1.491 | -1.075 | -0.161 | 1.817  | 1.042  | -0.330 |
| 12/4/2015  | 2.222  | 1.046  | 0.658  | 0.141  | 0.040  | -0.368 |
| 12/7/2015  | -0.567 | -0.485 | -0.848 | -0.284 | -1.189 | 0.250  |
| 12/8/2015  | -0.654 | -1.051 | -0.285 | -1.431 | -2.022 | 0.453  |
| 12/9/2015  | -0.763 | -0.313 | 0.248  | -0.232 | -1.079 | 0.146  |
| 12/10/2015 | 0.155  | -0.007 | -0.654 | 0.302  | 1.770  | 0.011  |
| 12/11/2015 | -1.942 | -1.633 | -1.072 | 0.039  | 0.311  | -0.192 |
| 12/14/2015 | 0.374  | -0.289 | 0.994  | -1.869 | -0.514 | -0.298 |
| 12/15/2015 | 1.064  | 0.947  | 0.159  | -0.310 | -1.342 | 0.071  |
| 12/16/2015 | 1.506  | 1.370  | -0.332 | 0.846  | 0.145  | 0.667  |
| 12/17/2015 | -1.539 | -0.844 | -0.151 | 1.178  | 0.573  | -1.016 |
| 12/18/2015 | -1.908 | -1.381 | 0.138  | 0.153  | -1.468 | 0.342  |
| 12/21/2015 | 0.812  | 0.311  | 0.190  | 0.869  | 1.333  | 0.613  |
| 12/22/2015 | 0.847  | 0.687  | -0.077 | 0.145  | 0.270  | -0.896 |
| 12/23/2015 | 1.169  | 1.271  | -0.154 | -0.045 | -0.157 | -1.001 |
| 12/24/2015 | -0.145 | 0.141  | -0.156 | 0.514  | 0.176  | -0.368 |
| 12/28/2015 | -0.193 | -0.260 | 0.237  | -0.819 | 0.172  | -0.049 |
| 12/29/2015 | 1.067  | 0.859  | 0.180  | 0.478  | -0.556 | 0.730  |
| 12/30/2015 | -0.666 | -0.599 | 0.160  | 1.302  | 1.862  | 0.059  |
| 12/31/2015 | -1.031 | -0.849 | -0.106 | 0.508  | 2.632  | 1.748  |
| 1/4/2016   | -1.555 | -2.003 | -0.346 | -0.521 | -1.850 | -0.129 |

|           |        |        |        |        |        |        |
|-----------|--------|--------|--------|--------|--------|--------|
| 1/5/2016  | 0.109  | -0.061 | -0.188 | 0.064  | -0.884 | -0.068 |
| 1/6/2016  | -1.389 | -1.292 | -0.674 | -0.748 | -1.735 | 0.734  |
| 1/7/2016  | -2.383 | -2.191 | -0.620 | 0.198  | -0.863 | 0.309  |
| 1/8/2016  | -1.072 | -0.882 | -0.170 | 0.082  | -1.146 | -1.507 |
| 1/11/2016 | 0.216  | -0.208 | -0.743 | -2.513 | -1.835 | -0.756 |
| 1/12/2016 | 0.788  | 0.343  | 0.118  | -1.642 | -2.036 | -0.917 |
| 1/13/2016 | -2.526 | -1.074 | 0.048  | -1.973 | -2.416 | -0.258 |
| 1/14/2016 | 1.628  | 0.418  | -0.182 | -3.193 | -4.699 | -0.992 |
| 1/15/2016 | -2.194 | -1.903 | -0.418 | 0.268  | -2.527 | 0.258  |
| 1/19/2016 | 0.200  | 0.098  | -1.158 | 2.327  | -2.762 | -1.363 |
| 1/20/2016 | -1.028 | -1.955 | -0.332 | -2.998 | 4.584  | -1.385 |
| 1/21/2016 | 0.399  | 0.490  | -0.816 | -0.856 | 1.651  | -0.899 |
| 1/22/2016 | 2.013  | 2.513  | 0.182  | -0.027 | 2.199  | 0.000  |
| 1/25/2016 | -1.476 | -1.015 | -0.121 | 1.764  | -0.209 | 0.309  |
| 1/26/2016 | 1.379  | 0.951  | 0.116  | 0.184  | -1.374 | -0.389 |
| 1/27/2016 | -1.056 | -0.235 | -0.251 | 0.639  | -2.458 | 0.203  |
| 1/28/2016 | 0.093  | 0.154  | 0.727  | 0.563  | 1.977  | 0.154  |
| 1/29/2016 | 2.554  | 1.948  | 0.873  | -0.392 | 1.093  | 0.209  |
| 2/1/2016  | -0.055 | 0.198  | -0.169 | -0.401 | 1.026  | 0.777  |
| 2/2/2016  | -1.995 | -1.896 | 0.140  | 1.156  | -0.188 | 1.065  |
| 2/3/2016  | 0.408  | 0.202  | -0.218 | 0.967  | -1.327 | 1.409  |
| 2/4/2016  | 0.164  | 0.627  | 0.675  | 1.780  | 0.664  | -0.200 |
| 2/5/2016  | -1.782 | -1.452 | 0.270  | 0.122  | 0.021  | 0.503  |
| 2/8/2016  | -1.467 | -1.564 | -0.025 | -0.274 | -0.074 | 0.532  |
| 2/9/2016  | -0.043 | -0.604 | 0.231  | -1.260 | 0.193  | 0.194  |
| 2/10/2016 | -0.049 | -0.166 | 0.481  | 0.398  | 0.412  | -0.083 |
| 2/11/2016 | -1.299 | -1.306 | -0.182 | -1.690 | 1.180  | -0.401 |
| 2/12/2016 | 1.992  | 1.298  | -0.268 | -0.346 | -0.483 | 0.019  |
| 2/16/2016 | 1.739  | 2.123  | -0.604 | 1.206  | -0.739 | 0.022  |
| 2/17/2016 | 1.493  | 1.535  | 0.037  | 0.012  | -1.079 | -0.115 |
| 2/18/2016 | -0.453 | -0.024 | -0.185 | 0.073  | 0.772  | 0.002  |
| 2/19/2016 | -0.088 | -0.386 | -0.005 | 0.419  | 0.669  | 0.417  |
| 2/22/2016 | 1.454  | 1.288  | 0.006  | 0.812  | -0.372 | -0.659 |
| 2/23/2016 | -1.270 | -1.159 | -0.013 | -0.255 | -0.272 | 0.386  |
| 2/24/2016 | 0.427  | -0.451 | -0.730 | -0.681 | -1.383 | -0.079 |
| 2/25/2016 | 1.190  | 1.236  | -0.626 | -0.007 | 0.671  | 0.116  |
| 2/26/2016 | -0.215 | 0.016  | -0.379 | -0.523 | 0.446  | 0.110  |
| 2/29/2016 | -0.849 | -0.504 | 0.327  | 0.140  | 0.569  | 0.557  |
| 3/1/2016  | 2.471  | 1.851  | 0.418  | -0.118 | 0.410  | -0.126 |
| 3/2/2016  | 0.366  | 0.846  | 0.323  | 0.390  | 0.643  | 1.715  |
| 3/3/2016  | 0.329  | 0.646  | 0.221  | 0.682  | 0.653  | 1.148  |
| 3/4/2016  | 0.327  | 0.665  | 0.432  | 0.088  | -0.635 | 1.617  |
| 3/7/2016  | 0.051  | 0.023  | 0.195  | 1.518  | 1.141  | -0.119 |
| 3/8/2016  | -1.054 | -0.851 | -0.173 | 0.883  | 0.747  | -1.822 |
| 3/9/2016  | 0.358  | 0.248  | 0.183  | 0.162  | 0.142  | 0.341  |
| 3/10/2016 | -0.028 | -0.070 | -0.029 | 2.538  | 0.425  | -0.046 |
| 3/11/2016 | 1.641  | 1.760  | 0.321  | -0.061 | 0.091  | 0.262  |

|           |        |        |        |        |        |        |
|-----------|--------|--------|--------|--------|--------|--------|
| 3/14/2016 | -0.149 | 0.129  | -0.664 | -3.599 | 0.211  | 0.095  |
| 3/15/2016 | -0.188 | -0.511 | -0.785 | 0.690  | -1.694 | -0.048 |
| 3/16/2016 | 0.427  | 0.145  | -0.217 | 1.114  | -1.145 | 0.318  |
| 3/17/2016 | 0.546  | 1.365  | 1.609  | 2.148  | 0.461  | 0.099  |
| 3/18/2016 | 0.473  | 0.233  | -0.147 | 0.175  | 0.134  | -0.057 |
| 3/21/2016 | 0.116  | -0.143 | -0.100 | 0.646  | 0.955  | -0.809 |
| 3/22/2016 | -0.090 | -0.060 | 0.034  | 0.424  | 0.495  | 0.730  |
| 3/23/2016 | -0.574 | -0.718 | -0.424 | 0.422  | -0.603 | 0.803  |
| 3/24/2016 | -0.018 | -0.540 | -0.472 | -0.028 | 0.765  | 0.228  |
| 3/28/2016 | 0.007  | 0.350  | 0.586  | -0.590 | 0.000  | 0.000  |
| 3/29/2016 | 0.862  | 0.508  | -0.090 | 0.044  | 0.000  | 0.000  |
| 3/30/2016 | 0.552  | 1.090  | 0.730  | -0.514 | -1.543 | -0.005 |
| 3/31/2016 | -0.220 | -0.322 | 0.899  | 0.078  | 0.504  | 0.535  |
| 4/1/2016  | 0.618  | -0.504 | -0.106 | -0.057 | 0.262  | -0.595 |
| 4/4/2016  | -0.284 | -0.030 | 0.261  | 1.043  | -1.294 | 0.053  |
| 4/5/2016  | -1.001 | -1.390 | -0.123 | 0.757  | 0.784  | -0.085 |
| 4/6/2016  | 0.925  | 0.807  | -0.312 | -0.888 | -0.452 | 0.242  |
| 4/7/2016  | -1.291 | -0.800 | -0.037 | 0.090  | 0.590  | 0.386  |
| 4/8/2016  | 0.238  | 0.610  | 0.358  | -0.398 | 0.145  | -0.733 |
| 4/11/2016 | -0.187 | 0.091  | 0.472  | -0.639 | -2.240 | -0.531 |
| 4/12/2016 | 0.855  | 0.817  | -0.037 | -0.268 | -0.025 | -0.688 |
| 4/13/2016 | 1.189  | 1.399  | 0.270  | 0.537  | 1.166  | 0.017  |
| 4/14/2016 | 0.043  | 0.400  | 0.106  | 0.291  | 0.211  | 0.103  |
| 4/15/2016 | -0.086 | -0.074 | -0.274 | 0.389  | 0.321  | 0.390  |
| 4/18/2016 | 0.575  | 0.274  | -0.164 | 1.418  | -1.135 | 0.050  |
| 4/19/2016 | 0.338  | 1.094  | 0.505  | 1.495  | 0.775  | 0.169  |
| 4/20/2016 | 0.046  | 0.109  | 0.061  | -0.534 | 0.868  | 0.486  |
| 4/21/2016 | -0.510 | -0.285 | -0.148 | -0.307 | 0.723  | 0.570  |
| 4/22/2016 | -0.152 | -0.242 | -0.343 | -0.037 | 0.081  | 0.403  |
| 4/25/2016 | -0.099 | -0.250 | -0.276 | -0.273 | -0.257 | -0.552 |
| 4/26/2016 | 0.038  | 0.184  | 0.825  | 1.653  | -0.102 | -0.264 |
| 4/27/2016 | -0.013 | 0.000  | -0.037 | 0.252  | 0.246  | -0.372 |
| 4/28/2016 | -0.987 | -0.449 | 0.699  | -0.032 | 0.358  | 0.882  |
| 4/29/2016 | -0.490 | -0.473 | 0.985  | 1.379  | 0.956  | 0.583  |
| 5/2/2016  | 0.774  | 0.325  | 0.007  | -0.150 | 0.000  | 0.000  |
| 5/3/2016  | -0.811 | -1.091 | -1.036 | -1.469 | 0.000  | 0.000  |
| 5/4/2016  | -0.588 | -0.869 | -0.336 | -0.536 | -0.408 | -0.822 |
| 5/5/2016  | -0.109 | -0.226 | 0.271  | 0.962  | -0.100 | 0.077  |
| 5/6/2016  | 0.355  | 0.143  | -0.099 | 0.061  | 0.206  | 0.343  |
| 5/9/2016  | 0.090  | -0.060 | -0.339 | 0.999  | 1.065  | -0.224 |
| 5/10/2016 | 1.179  | 1.184  | -0.261 | -0.120 | -0.187 | 0.068  |
| 5/11/2016 | -0.983 | -0.545 | -0.050 | -0.852 | 0.732  | 0.476  |
| 5/12/2016 | -0.075 | -0.247 | -0.126 | -0.170 | 0.753  | 0.253  |
| 5/13/2016 | -0.844 | -0.928 | -0.161 | -0.728 | 2.305  | 0.032  |
| 5/16/2016 | 1.012  | 0.823  | -0.404 | -1.000 | 1.424  | -0.373 |
| 5/17/2016 | -0.989 | -0.444 | 0.059  | 0.210  | -1.078 | -0.852 |
| 5/18/2016 | 0.154  | -0.083 | -0.547 | 0.674  | 1.297  | 0.277  |

|           |        |        |        |        |         |        |
|-----------|--------|--------|--------|--------|---------|--------|
| 5/19/2016 | -0.357 | -0.842 | -0.593 | -0.978 | 1.965   | 0.529  |
| 5/20/2016 | 0.620  | 0.691  | -0.410 | -0.056 | 0.174   | 0.083  |
| 5/23/2016 | -0.220 | -0.280 | -0.230 | -0.803 | -0.655  | -0.184 |
| 5/24/2016 | 1.370  | 1.124  | 0.281  | -0.008 | 0.086   | 0.212  |
| 5/25/2016 | 0.780  | 0.963  | -0.163 | 0.112  | 4.128   | -0.060 |
| 5/26/2016 | -0.034 | 0.223  | 0.057  | -0.041 | 3.027   | -0.158 |
| 5/27/2016 | 0.459  | 0.230  | 0.233  | 0.067  | -0.646  | 0.078  |
| 5/31/2016 | 0.002  | -0.126 | -0.509 | -0.642 | -5.030  | -1.703 |
| 6/1/2016  | 0.003  | -0.111 | 0.226  | 0.824  | -4.176  | 0.000  |
| 6/2/2016  | 0.291  | 0.044  | 0.157  | 0.375  | 1.011   | 0.000  |
| 6/3/2016  | -0.312 | 0.267  | 0.416  | 0.522  | 3.065   | 0.058  |
| 6/6/2016  | 0.401  | 0.494  | 0.960  | 0.096  | -0.728  | -0.326 |
| 6/7/2016  | 0.006  | 0.521  | -0.276 | 0.394  | -0.959  | 0.440  |
| 6/8/2016  | 0.352  | 0.314  | 0.007  | 0.405  | -0.325  | 0.388  |
| 6/9/2016  | -0.161 | -0.607 | -0.682 | -0.549 | 0.608   | 0.448  |
| 6/10/2016 | -0.813 | -1.360 | -0.850 | -0.015 | 0.342   | 0.586  |
| 6/13/2016 | -0.858 | -1.243 | 0.105  | -1.110 | 0.199   | -0.591 |
| 6/14/2016 | -0.264 | -0.946 | -0.753 | -0.709 | -0.452  | -0.494 |
| 6/15/2016 | -0.150 | 0.228  | -0.248 | -1.014 | 3.356   | 0.503  |
| 6/16/2016 | 0.340  | -0.274 | -0.742 | -0.206 | 2.305   | 0.231  |
| 6/17/2016 | -0.345 | 0.493  | 0.556  | 0.361  | 2.227   | -0.022 |
| 6/20/2016 | 0.493  | 1.667  | 0.958  | -1.576 | -25.037 | -0.131 |
| 6/21/2016 | 0.297  | 0.320  | 0.343  | 0.449  | -4.529  | -0.384 |
| 6/22/2016 | -0.146 | -0.022 | 0.390  | -1.180 | 1.419   | -0.715 |
| 6/23/2016 | 1.332  | 1.445  | 0.668  | 1.160  | 2.275   | -0.673 |
| 6/24/2016 | -3.700 | -5.050 | -1.326 | -0.532 | -1.930  | -1.769 |
| 6/27/2016 | -1.763 | -2.234 | -1.229 | -3.489 | -2.407  | -1.290 |
| 6/28/2016 | 1.670  | 1.678  | 0.458  | 0.607  | -1.204  | -0.337 |
| 6/29/2016 | 1.701  | 2.182  | 1.151  | -0.103 | 1.085   | 0.015  |
| 6/30/2016 | 1.370  | 1.204  | 0.305  | 0.046  | -1.221  | 0.484  |
| 7/1/2016  | 0.187  | 0.411  | 0.710  | -0.063 | -0.725  | 0.003  |
| 7/5/2016  | -0.702 | -0.891 | -0.217 | 2.255  | -0.935  | -0.208 |
| 7/6/2016  | 0.491  | -0.331 | -0.050 | 0.000  | 0.000   | 0.340  |
| 7/7/2016  | -0.057 | 0.241  | 0.394  | 0.000  | 0.000   | 0.000  |
| 7/8/2016  | 1.507  | 1.137  | 0.066  | 0.000  | -0.833  | 0.000  |
| 7/11/2016 | 0.371  | 0.874  | 0.062  | 2.533  | -0.070  | -0.557 |
| 7/12/2016 | 0.710  | 0.896  | -0.215 | -0.185 | 0.428   | -0.968 |
| 7/13/2016 | 0.052  | 0.226  | -0.226 | 1.170  | -0.770  | 0.056  |
| 7/14/2016 | 0.614  | 0.603  | 0.353  | 0.911  | -0.377  | -0.591 |
| 7/15/2016 | -0.111 | -0.094 | -0.183 | -0.054 | -1.933  | -0.445 |
| 7/18/2016 | 0.291  | 0.203  | -0.232 | 0.402  | -1.854  | -0.852 |
| 7/19/2016 | -0.083 | -0.305 | -0.281 | -0.116 | -1.010  | -0.360 |
| 7/20/2016 | 0.447  | 0.457  | 0.284  | -1.095 | -1.320  | 0.434  |
| 7/21/2016 | -0.237 | -0.072 | 0.260  | -0.506 | -2.363  | 0.152  |
| 7/22/2016 | 0.527  | 0.101  | -0.222 | 0.072  | -1.626  | -0.185 |
| 7/25/2016 | -0.244 | -0.203 | -0.126 | 0.684  | 0.983   | 0.672  |
| 7/26/2016 | 0.055  | 0.094  | -0.020 | 0.791  | 1.104   | 1.237  |

|           |        |        |        |        |        |        |
|-----------|--------|--------|--------|--------|--------|--------|
| 7/27/2016 | -0.028 | 0.094  | 0.167  | 2.590  | -0.609 | 0.774  |
| 7/28/2016 | 0.139  | 0.022  | 0.353  | 1.051  | -1.120 | 0.557  |
| 7/29/2016 | 0.273  | 0.720  | 0.559  | 0.091  | 0.215  | 0.083  |
| 8/1/2016  | 0.090  | -0.187 | 0.145  | -0.935 | -1.070 | 0.057  |
| 8/2/2016  | -0.698 | -0.700 | 0.208  | 0.603  | 0.382  | 0.906  |
| 8/3/2016  | 0.266  | -0.196 | -0.307 | 0.708  | -0.734 | 0.218  |
| 8/4/2016  | 0.007  | 0.261  | 1.188  | 0.802  | -0.139 | -1.136 |
| 8/5/2016  | 0.898  | 0.577  | 0.121  | -0.080 | -1.562 | 0.371  |
| 8/8/2016  | -0.136 | 0.251  | 0.101  | 0.330  | 0.854  | -0.371 |
| 8/9/2016  | 0.015  | 0.487  | 0.096  | -0.856 | -1.777 | 0.026  |
| 8/10/2016 | -0.243 | -0.079 | 0.037  | 0.539  | 1.069  | 0.095  |
| 8/11/2016 | 0.430  | 0.485  | -0.043 | 1.119  | -0.339 | -0.019 |
| 8/12/2016 | -0.170 | -0.007 | -0.486 | -0.173 | -0.298 | 0.222  |
| 8/15/2016 | 0.264  | 0.199  | 0.326  | 0.854  | -0.375 | 0.090  |
| 8/16/2016 | -0.557 | -0.420 | -0.392 | -0.473 | 0.228  | 1.211  |
| 8/17/2016 | 0.146  | 0.014  | -0.079 | -0.245 | 0.374  | 0.503  |
| 8/18/2016 | 0.140  | 0.349  | 0.129  | -0.057 | -6.661 | -0.039 |
| 8/19/2016 | -0.105 | -0.292 | -0.285 | 0.073  | 2.975  | -0.646 |
| 8/22/2016 | -0.086 | -0.036 | 0.033  | -0.673 | 3.908  | -1.518 |
| 8/23/2016 | 0.225  | 0.341  | 0.370  | -0.447 | 0.372  | 0.702  |
| 8/24/2016 | -0.482 | -0.427 | -1.488 | 0.189  | -2.203 | 0.188  |
| 8/25/2016 | -0.091 | -0.207 | -0.083 | -0.649 | 5.651  | -5.561 |
| 8/26/2016 | -0.117 | -0.043 | -0.041 | 0.128  | -0.441 | -3.972 |
| 8/29/2016 | 0.502  | -0.007 | -0.769 | -1.048 | -0.847 | -2.424 |
| 8/30/2016 | -0.149 | -0.057 | 0.046  | 0.166  | 0.074  | -0.433 |
| 8/31/2016 | -0.188 | -0.294 | -0.545 | 0.340  | 0.165  | 2.213  |
| 9/1/2016  | -0.007 | 0.143  | 0.080  | 0.019  | 0.690  | -0.869 |
| 9/2/2016  | 0.369  | 0.636  | 0.405  | 0.150  | -0.050 | -0.310 |
| 9/6/2016  | 0.180  | 0.667  | 0.581  | 0.728  | -0.599 | -1.299 |
| 9/7/2016  | -0.062 | 0.071  | -0.012 | -0.268 | 0.658  | 0.319  |
| 9/8/2016  | -0.357 | -0.191 | 0.182  | 0.533  | 0.132  | -0.081 |
| 9/9/2016  | -2.352 | -2.104 | -0.820 | -0.173 | -0.045 | 0.754  |
| 9/12/2016 | 1.473  | 0.274  | -0.163 | 0.000  | 0.000  | 0.000  |
| 9/13/2016 | -1.381 | -1.197 | -0.046 | 0.000  | 0.000  | 0.000  |
| 9/14/2016 | 0.024  | -0.131 | 0.066  | 0.000  | -0.726 | -0.357 |
| 9/15/2016 | 1.041  | 0.721  | 0.019  | -1.076 | 0.142  | 0.080  |
| 9/16/2016 | -0.313 | -0.560 | -0.065 | -0.142 | 0.388  | 0.030  |
| 9/19/2016 | -0.017 | 0.422  | 0.431  | -0.061 | -0.018 | 0.816  |
| 9/20/2016 | 0.116  | 0.036  | 0.820  | 0.435  | 0.541  | 0.156  |
| 9/21/2016 | 0.995  | 1.048  | 0.201  | -0.836 | -0.705 | 0.341  |
| 9/22/2016 | 0.653  | 1.150  | 0.781  | 0.185  | 0.428  | 0.778  |
| 9/23/2016 | -0.526 | -0.627 | 0.085  | -0.026 | -0.451 | 0.574  |
| 9/26/2016 | -0.952 | -0.912 | 0.451  | 0.569  | -0.389 | 0.136  |
| 9/27/2016 | 0.736  | 0.339  | 0.831  | -0.269 | 0.293  | 0.179  |
| 9/28/2016 | 0.339  | 0.359  | -0.367 | -0.425 | 0.306  | -0.175 |
| 9/29/2016 | -0.967 | -0.294 | -0.425 | 0.033  | -0.572 | 1.540  |
| 9/30/2016 | 0.790  | 0.316  | 0.117  | 0.087  | -0.216 | 1.009  |

|            |        |        |        |         |        |        |
|------------|--------|--------|--------|---------|--------|--------|
| 10/3/2016  | -0.374 | -0.136 | 0.152  | 1.629   | -0.230 | 1.615  |
| 10/4/2016  | -0.425 | -0.259 | -2.532 | 0.385   | -0.060 | -0.656 |
| 10/5/2016  | 0.386  | 0.237  | 2.676  | 1.685   | -0.791 | -0.077 |
| 10/6/2016  | 0.048  | -0.036 | -0.140 | 0.020   | -0.774 | -0.381 |
| 10/7/2016  | -0.225 | -0.309 | 0.089  | 0.353   | -0.658 | 0.068  |
| 10/10/2016 | 0.383  | 0.431  | -0.309 | 0.190   | 0.929  | 0.039  |
| 10/11/2016 | -1.177 | -1.124 | -1.002 | -0.848  | -0.154 | -0.527 |
| 10/12/2016 | 0.117  | -0.276 | 0.073  | -0.410  | -0.098 | -0.223 |
| 10/13/2016 | -0.292 | -0.415 | 0.284  | 1.981   | -0.648 | -0.001 |
| 10/14/2016 | 0.034  | 0.321  | 0.801  | -0.060  | -0.359 | 0.338  |
| 10/17/2016 | -0.290 | -0.350 | 0.398  | -1.505  | -1.376 | -1.090 |
| 10/18/2016 | 0.570  | 0.735  | 0.358  | -0.196  | -0.389 | 0.474  |
| 10/19/2016 | 0.141  | 0.289  | 0.414  | -0.484  | -1.040 | -0.497 |
| 10/20/2016 | -0.199 | -0.123 | 0.425  | 0.720   | 0.441  | 0.000  |
| 10/21/2016 | -0.082 | -0.188 | -0.258 | -0.006  | 0.647  | 0.000  |
| 10/24/2016 | 0.496  | 0.326  | -0.104 | -0.599  | -1.156 | 0.502  |
| 10/25/2016 | -0.336 | -0.268 | -0.043 | 0.063   | 0.882  | -0.135 |
| 10/26/2016 | -0.201 | -0.123 | 0.170  | -0.054  | 0.682  | -0.020 |
| 10/27/2016 | -0.188 | -0.320 | 0.115  | 0.823   | 0.057  | 0.214  |
| 10/28/2016 | -0.530 | -0.321 | -0.168 | 0.612   | 0.196  | 0.050  |
| 10/31/2016 | 0.052  | 0.022  | 0.249  | 0.850   | -0.729 | 0.051  |
| 11/1/2016  | -0.727 | -0.402 | -0.337 | 0.514   | 0.288  | 0.572  |
| 11/2/2016  | -0.675 | -0.684 | 0.231  | 0.913   | -0.573 | 0.905  |
| 11/3/2016  | -0.410 | -0.384 | 0.201  | -18.581 | 0.207  | 1.021  |
| 11/4/2016  | -0.129 | -0.408 | 0.030  | -5.796  | -1.192 | 0.031  |
| 11/7/2016  | 2.257  | 1.652  | 0.305  | 1.040   | -0.763 | -0.595 |
| 11/8/2016  | 0.361  | 0.394  | 0.680  | -0.884  | -0.197 | -0.373 |
| 11/9/2016  | 1.165  | 0.138  | -0.631 | 1.691   | -1.238 | -0.578 |
| 11/10/2016 | 0.219  | 0.341  | -0.638 | 3.209   | 0.274  | 0.599  |
| 11/11/2016 | -0.010 | -0.283 | -0.762 | -0.070  | 0.332  | 0.086  |
| 11/14/2016 | -0.009 | -0.321 | -0.537 | 2.584   | -1.638 | 0.214  |
| 11/15/2016 | 0.679  | 0.567  | 0.803  | -0.017  | 0.367  | -0.381 |
| 11/16/2016 | -0.076 | -0.196 | 0.009  | 0.966   | -0.705 | 0.459  |
| 11/17/2016 | 0.509  | 0.428  | 0.277  | 0.264   | -0.344 | 0.009  |
| 11/18/2016 | -0.297 | -0.573 | -0.076 | -1.085  | -0.106 | -0.773 |
| 11/21/2016 | 0.594  | 0.740  | 0.195  | -2.978  | -0.437 | -0.361 |
| 11/22/2016 | 0.207  | 0.267  | -0.428 | 0.260   | -0.490 | -0.187 |
| 11/23/2016 | 0.086  | -0.188 | -0.207 | -0.334  | 0.506  | -0.041 |
| 11/25/2016 | 0.460  | 0.641  | 0.102  | -0.648  | -0.613 | -0.850 |
| 11/28/2016 | -0.468 | -0.424 | 0.508  | -0.129  | -0.169 | -0.398 |
| 11/29/2016 | 0.169  | 0.065  | 0.214  | -0.854  | -0.468 | -0.460 |
| 11/30/2016 | -0.474 | -0.137 | 0.078  | 1.472   | 1.180  | 0.050  |
| 12/1/2016  | -0.334 | -0.152 | 0.306  | 0.094   | -0.460 | -0.233 |
| 12/2/2016  | 0.012  | -0.022 | -0.055 | 0.149   | 1.943  | -0.132 |
| 12/5/2016  | 0.578  | 0.511  | 0.398  | -0.038  | -0.322 | -0.371 |
| 12/6/2016  | 0.373  | 0.616  | 0.809  | 0.438   | 0.211  | -0.911 |
| 12/7/2016  | 1.333  | 1.334  | 0.225  | -0.671  | 0.392  | -0.297 |

|            |        |        |        |        |        |        |
|------------|--------|--------|--------|--------|--------|--------|
| 12/8/2016  | 0.244  | 0.296  | -0.049 | -0.484 | 0.300  | -0.584 |
| 12/9/2016  | 0.642  | 0.379  | -0.076 | 0.712  | 0.020  | -1.210 |
| 12/12/2016 | -0.104 | 0.021  | 0.211  | 0.318  | -0.170 | 0.000  |
| 12/13/2016 | 0.628  | 0.774  | 0.063  | -0.801 | 1.711  | 0.000  |
| 12/14/2016 | -0.719 | -0.592 | 0.002  | -0.307 | 1.130  | 0.151  |
| 12/15/2016 | 0.401  | -0.483 | -0.637 | -0.009 | 0.799  | -0.800 |
| 12/16/2016 | -0.260 | -0.063 | -0.775 | 1.770  | -0.619 | -0.260 |
| 12/19/2016 | 0.227  | 0.182  | -0.048 | 1.109  | -0.643 | 0.091  |
| 12/20/2016 | 0.426  | 0.189  | -0.115 | -0.259 | -0.583 | -0.086 |
| 12/21/2016 | -0.285 | -0.084 | 0.256  | -0.131 | 0.123  | -0.330 |
| 12/22/2016 | -0.169 | -0.147 | -0.288 | 2.252  | -0.054 | 0.584  |
| 12/23/2016 | 0.136  | 0.056  | 0.176  | 2.217  | -0.769 | -0.058 |
| 12/27/2016 | 0.222  | 0.091  | 0.021  | -1.865 | 0.222  | 0.000  |
| 12/28/2016 | -0.816 | -0.520 | -0.055 | 0.198  | 0.787  | 0.000  |
| 12/29/2016 | -0.031 | 0.169  | 0.283  | 0.741  | 0.372  | -0.126 |
| 12/30/2016 | -0.473 | -0.091 | -0.006 | 1.544  | 0.370  | 2.176  |
| 1/3/2017   | 0.826  | 0.400  | -0.168 | -0.411 | -1.771 | -0.725 |
| 1/4/2017   | 0.536  | 0.809  | 0.184  | 1.302  | -1.025 | -1.174 |
| 1/5/2017   | -0.064 | 0.444  | -0.092 | 3.467  | 0.950  | -0.780 |
| 1/6/2017   | 0.368  | 0.014  | -0.204 | 1.541  | 0.188  | -1.781 |
| 1/9/2017   | -0.285 | -0.333 | -0.097 | 0.029  | 2.132  | -1.134 |
| 1/10/2017  | 0.003  | 0.160  | 0.322  | 1.139  | -1.575 | -1.159 |
| 1/11/2017  | 0.219  | 0.007  | -0.075 | -0.602 | -0.015 | -1.381 |
| 1/12/2017  | -0.217 | 0.360  | 0.694  | 0.572  | 0.334  | -1.224 |
| 1/13/2017  | 0.146  | 0.193  | 0.453  | -0.381 | 0.191  | -0.936 |
| 1/17/2017  | -0.399 | -0.269 | 0.585  | -1.192 | 0.415  | 0.734  |
| 1/18/2017  | 0.155  | 0.110  | 0.065  | -0.250 | 0.054  | -0.209 |
| 1/19/2017  | -0.329 | -0.547 | -0.360 | -1.799 | 2.272  | 0.232  |
| 1/20/2017  | 0.322  | 0.388  | -0.184 | 1.169  | 0.366  | -0.001 |
| 1/23/2017  | -0.223 | -0.076 | 0.142  | 0.546  | -0.114 | -0.177 |
| 1/24/2017  | 0.616  | 0.469  | 0.311  | -0.413 | -0.352 | -0.766 |
| 1/25/2017  | 0.836  | 0.843  | 0.367  | 0.024  | 0.062  | -0.588 |
| 1/26/2017  | -0.117 | -0.123 | -0.373 | 0.061  | 0.551  | -0.527 |
| 1/27/2017  | -0.009 | -0.034 | -0.175 | 0.587  | 0.114  | -0.714 |
| 1/30/2017  | -0.586 | -0.597 | -0.104 | -1.492 | -1.621 | -1.162 |
| 1/31/2017  | -0.088 | -0.062 | 0.084  | -1.155 | -0.115 | 1.286  |
| 2/1/2017   | 0.157  | 0.110  | 0.040  | -0.624 | -0.690 | 0.458  |
| 2/2/2017   | 0.038  | 0.082  | 0.152  | 1.071  | 0.575  | 0.870  |
| 2/3/2017   | 0.731  | 0.555  | 0.352  | 0.632  | -0.759 | 0.639  |
| 2/6/2017   | -0.208 | -0.397 | -0.049 | 1.139  | -3.779 | 0.800  |
| 2/7/2017   | 0.086  | -0.069 | -0.083 | 0.711  | -0.288 | 0.408  |
| 2/8/2017   | 0.105  | 0.213  | -0.156 | 1.369  | 0.524  | 0.595  |
| 2/9/2017   | 0.541  | 0.335  | -0.360 | 0.392  | -1.046 | 0.124  |
| 2/10/2017  | 0.310  | 0.368  | -0.147 | -0.439 | 0.795  | 0.070  |
| 2/13/2017  | 0.581  | 0.495  | -0.022 | 0.995  | -0.830 | -0.506 |
| 2/14/2017  | 0.532  | 0.074  | 0.218  | -0.299 | -1.392 | -0.408 |
| 2/15/2017  | 0.544  | 0.600  | 0.303  | 0.055  | 0.376  | 0.062  |

|           |        |        |        |        |        |        |
|-----------|--------|--------|--------|--------|--------|--------|
| 2/16/2017 | 0.009  | 0.168  | 0.924  | 1.921  | 0.046  | 0.265  |
| 2/17/2017 | 0.158  | -0.040 | -0.021 | -0.189 | 0.777  | -0.277 |
| 2/21/2017 | 0.658  | 0.422  | -0.225 | 0.582  | -0.173 | -0.206 |
| 2/22/2017 | -0.038 | 0.020  | 0.158  | -2.335 | 0.061  | 0.533  |
| 2/23/2017 | 0.049  | 0.114  | 0.385  | -1.746 | 1.211  | 0.708  |
| 2/24/2017 | 0.142  | -0.288 | -0.337 | 0.370  | -0.677 | 0.370  |
| 2/27/2017 | 0.009  | -0.013 | 0.175  | -0.366 | 0.984  | -0.066 |
| 2/28/2017 | -0.261 | -0.181 | -0.283 | -0.024 | -0.176 | -0.377 |
| 3/1/2017  | 1.312  | 0.962  | -0.125 | -1.152 | -1.567 | -1.664 |
| 3/2/2017  | -0.561 | -0.373 | -0.016 | 1.149  | 0.143  | -0.497 |
| 3/3/2017  | 0.101  | 0.020  | -0.377 | 0.370  | 0.331  | -0.335 |
| 3/6/2017  | -0.356 | -0.180 | 0.177  | -0.543 | 0.416  | -0.118 |
| 3/7/2017  | -0.269 | -0.241 | 0.227  | -1.876 | 1.683  | -0.129 |
| 3/8/2017  | -0.097 | -0.275 | 0.047  | -0.395 | 1.247  | -0.684 |
| 3/9/2017  | 0.042  | 0.007  | -0.604 | 0.663  | -1.992 | 0.651  |
| 3/10/2017 | 0.376  | 0.516  | 0.227  | 0.509  | 0.065  | 1.913  |
| 3/13/2017 | -0.024 | 0.220  | 0.207  | -0.072 | -0.957 | 1.655  |
| 3/14/2017 | -0.268 | -0.374 | 0.132  | -1.033 | 1.642  | 1.071  |
| 3/15/2017 | 0.787  | 0.627  | 0.081  | -0.434 | 0.408  | -1.386 |
| 3/16/2017 | -0.116 | 0.623  | 0.804  | 1.017  | 0.968  | -0.043 |
| 3/17/2017 | -0.237 | -0.093 | -0.002 | 0.083  | 1.153  | 1.357  |
| 3/20/2017 | -0.195 | -0.073 | 0.326  | -0.155 | 0.325  | 1.038  |
| 3/21/2017 | -1.271 | -0.664 | 0.106  | -0.135 | -2.158 | 0.224  |
| 3/22/2017 | 0.186  | -0.220 | 0.090  | -0.441 | 2.148  | 0.865  |
| 3/23/2017 | -0.128 | 0.100  | 0.037  | -0.595 | 0.295  | 0.802  |
| 3/24/2017 | -0.076 | 0.033  | 0.126  | -0.460 | -0.314 | 0.542  |
| 3/27/2017 | -0.103 | -0.067 | -0.094 | -0.163 | 0.015  | 0.836  |
| 3/28/2017 | 0.709  | 0.738  | -0.104 | 0.322  | 0.271  | 0.316  |
| 3/29/2017 | 0.011  | -0.152 | -0.102 | -0.297 | -0.839 | -0.227 |
| 3/30/2017 | 0.262  | 0.186  | 0.129  | -0.855 | 0.360  | 0.509  |
| 3/31/2017 | -0.175 | -0.372 | -0.582 | -0.220 | 0.024  | 0.335  |
| 4/3/2017  | -0.126 | -0.253 | -0.212 | -0.387 | -1.063 | 0.035  |
| 4/4/2017  | 0.050  | 0.073  | 0.263  | 1.107  | -0.260 | -0.158 |
| 4/5/2017  | -0.307 | -0.187 | -0.169 | 0.080  | 1.110  | 0.216  |
| 4/6/2017  | 0.100  | -0.033 | 0.079  | -1.003 | -0.273 | 0.909  |
| 4/7/2017  | -0.118 | -0.100 | 0.053  | 0.143  | 0.029  | 0.479  |
| 4/10/2017 | 0.028  | 0.040  | 0.065  | -1.074 | -0.724 | -0.476 |
| 4/11/2017 | -0.175 | -0.027 | 0.036  | 0.612  | -0.324 | -0.326 |
| 4/12/2017 | -0.352 | -0.241 | 0.789  | -0.229 | 0.565  | 0.992  |
| 4/13/2017 | -0.637 | -0.550 | 0.693  | -0.335 | -0.540 | 0.315  |
| 4/17/2017 | 0.900  | 0.651  | 0.045  | 0.013  | 0.000  | 0.000  |
| 4/18/2017 | -0.230 | -0.463 | 0.227  | 0.478  | 0.000  | 0.000  |
| 4/19/2017 | -0.180 | -0.182 | 0.300  | -0.056 | 0.607  | 0.364  |
| 4/20/2017 | 0.778  | 0.678  | 0.594  | 0.018  | 0.205  | 0.169  |
| 4/21/2017 | -0.357 | -0.254 | 0.105  | -0.427 | -0.513 | -0.273 |
| 4/24/2017 | 1.079  | 1.649  | 0.435  | -0.173 | 1.800  | 0.203  |
| 4/25/2017 | 0.640  | 0.598  | 0.218  | 0.070  | 0.379  | -1.094 |

|           |        |        |        |        |        |        |
|-----------|--------|--------|--------|--------|--------|--------|
| 4/26/2017 | -0.045 | -0.033 | 0.238  | 0.466  | 0.349  | 0.804  |
| 4/27/2017 | 0.108  | -0.085 | -0.072 | 0.370  | 1.351  | -0.144 |
| 4/28/2017 | -0.228 | -0.177 | 0.204  | 0.782  | -0.501 | -0.286 |
| 5/1/2017  | 0.259  | 0.249  | 0.000  | 0.000  | 0.000  | 0.000  |
| 5/2/2017  | 0.119  | 0.190  | 0.000  | 0.000  | 0.000  | 0.000  |
| 5/3/2017  | -0.069 | -0.124 | -0.033 | 0.123  | -0.859 | 0.024  |
| 5/4/2017  | 0.138  | 0.203  | -0.319 | 0.509  | -0.076 | 0.743  |
| 5/5/2017  | 0.324  | 0.509  | 0.811  | -0.195 | 0.690  | 0.628  |
| 5/8/2017  | 0.066  | 0.059  | 0.175  | 0.135  | 0.569  | 0.251  |
| 5/9/2017  | -0.076 | -0.176 | 0.137  | 0.183  | 1.327  | -0.497 |
| 5/10/2017 | 0.104  | 0.104  | -0.049 | -0.003 | 2.813  | -0.027 |
| 5/11/2017 | -0.212 | -0.202 | 0.143  | -0.116 | 2.565  | 0.966  |
| 5/12/2017 | -0.112 | 0.078  | 0.539  | 0.246  | 0.127  | 0.679  |
| 5/15/2017 | 0.485  | 0.468  | 0.232  | 0.025  | -2.423 | -0.012 |
| 5/16/2017 | -0.046 | 0.253  | 0.266  | -0.266 | 0.826  | -0.199 |
| 5/17/2017 | -1.920 | -1.322 | 0.957  | 0.539  | 1.776  | 0.504  |
| 5/18/2017 | 0.382  | -0.243 | -0.406 | 0.102  | 0.866  | 1.349  |
| 5/19/2017 | 0.612  | 0.753  | 1.050  | 0.017  | 0.004  | 0.514  |
| 5/22/2017 | 0.505  | 0.494  | 0.664  | -0.899 | 0.022  | 0.942  |
| 5/23/2017 | 0.242  | 0.117  | 0.508  | 0.087  | 0.294  | 0.428  |
| 5/24/2017 | 0.224  | 0.013  | 0.331  | -0.078 | 1.453  | 2.259  |
| 5/25/2017 | 0.473  | 0.336  | 0.243  | 0.842  | 1.071  | 1.290  |
| 5/26/2017 | 0.016  | -0.110 | 0.168  | 0.037  | 2.231  | 0.631  |
| 5/30/2017 | -0.054 | -0.129 | 0.050  | -0.037 | 1.126  | -1.419 |
| 5/31/2017 | -0.096 | 0.039  | 0.409  | 0.731  | -0.318 | 2.233  |
| 6/1/2017  | 0.737  | 0.542  | 0.794  | 0.207  | 1.600  | 0.000  |
| 6/2/2017  | 0.470  | 0.616  | 0.781  | 0.433  | 2.500  | 0.000  |
| 6/5/2017  | -0.104 | -0.186 | 0.717  | 0.076  | 1.906  | 0.149  |
| 6/6/2017  | -0.302 | -0.263 | 0.393  | 0.455  | -0.008 | -1.036 |
| 6/7/2017  | 0.227  | 0.045  | 0.212  | 0.554  | 0.177  | 0.703  |
| 6/8/2017  | -0.010 | -0.109 | -0.015 | 0.700  | 0.681  | -0.007 |
| 6/9/2017  | -0.169 | 0.000  | 0.604  | -0.704 | 0.911  | 0.386  |
| 6/12/2017 | -0.123 | -0.245 | -0.338 | -0.898 | 0.076  | -0.068 |
| 6/13/2017 | 0.396  | 0.476  | 0.467  | 0.289  | -0.242 | 0.997  |
| 6/14/2017 | -0.029 | 0.077  | 0.689  | 0.472  | 2.467  | -0.200 |
| 6/15/2017 | -0.219 | -0.714 | 0.445  | -1.140 | 0.732  | 0.578  |
| 6/16/2017 | -0.019 | 0.322  | 0.771  | 0.648  | -0.095 | 0.181  |
| 6/19/2017 | 0.914  | 0.712  | 0.068  | 0.689  | 0.249  | -0.867 |
| 6/20/2017 | -0.646 | -0.699 | -0.087 | -0.101 | 0.190  | 0.045  |
| 6/21/2017 | 0.008  | -0.180 | 0.282  | -0.369 | -2.474 | 0.806  |
| 6/22/2017 | -0.016 | 0.077  | 0.057  | 0.426  | -1.707 | 0.293  |
| 6/23/2017 | 0.135  | 0.148  | 0.522  | 0.249  | -2.183 | -0.133 |
| 6/26/2017 | 0.034  | 0.199  | 0.319  | 0.000  | 0.000  | 0.000  |
| 6/27/2017 | -0.839 | -0.431 | 0.068  | 0.000  | 0.000  | 0.000  |
| 6/28/2017 | 0.860  | 0.745  | 0.917  | 0.000  | 2.460  | -0.756 |
| 6/29/2017 | -0.866 | -0.578 | 0.306  | 0.238  | 0.691  | -0.478 |
| 6/30/2017 | 0.133  | -0.155 | -0.325 | -0.277 | -0.154 | 0.010  |

|           |        |        |        |        |         |        |
|-----------|--------|--------|--------|--------|---------|--------|
| 7/3/2017  | 0.213  | 0.283  | -0.072 | 0.614  | -1.394  | -0.034 |
| 7/5/2017  | 0.222  | -0.026 | 0.004  | 0.222  | -1.592  | -0.895 |
| 7/6/2017  | -0.951 | -0.587 | -0.033 | 0.517  | 0.070   | 0.122  |
| 7/7/2017  | 0.664  | 0.207  | -0.239 | 0.934  | 0.275   | 0.393  |
| 7/10/2017 | 0.087  | 0.245  | 0.230  | 0.100  | 1.281   | -0.263 |
| 7/11/2017 | -0.147 | -0.019 | -0.108 | 1.017  | 0.985   | 0.101  |
| 7/12/2017 | 0.675  | 0.910  | 0.579  | 0.042  | 1.013   | 0.307  |
| 7/13/2017 | 0.243  | 0.274  | 0.421  | -0.077 | 0.266   | 0.328  |
| 7/14/2017 | 0.469  | 0.552  | 0.265  | -0.254 | 0.022   | 0.181  |
| 7/17/2017 | 0.014  | 0.019  | 0.404  | 0.335  | -0.120  | 0.951  |
| 7/18/2017 | 0.023  | -0.006 | 0.122  | -0.368 | 0.243   | 0.386  |
| 7/19/2017 | 0.421  | 0.366  | 0.077  | -0.739 | 1.106   | -0.110 |
| 7/20/2017 | -0.006 | 0.277  | 0.066  | 0.391  | 0.658   | 0.230  |
| 7/21/2017 | -0.054 | -0.277 | 0.284  | 0.012  | 0.457   | 0.645  |
| 7/24/2017 | -0.151 | -0.183 | -0.059 | 0.232  | 1.259   | 0.643  |
| 7/25/2017 | 0.342  | 0.385  | 0.385  | 0.205  | 1.871   | 0.542  |
| 7/26/2017 | -0.033 | 0.044  | 0.001  | 0.362  | 2.956   | 0.817  |
| 7/27/2017 | -0.321 | 0.075  | -0.020 | -0.799 | 1.236   | 0.031  |
| 7/28/2017 | -0.145 | -0.189 | 0.071  | 0.456  | 0.186   | 1.636  |
| 7/31/2017 | -0.041 | 0.107  | -0.352 | -1.090 | -2.586  | -0.367 |
| 8/1/2017  | 0.271  | 0.471  | 0.231  | 0.149  | -11.623 | -1.379 |
| 8/2/2017  | 0.126  | 0.050  | 0.202  | 0.172  | 0.901   | 0.144  |
| 8/3/2017  | -0.145 | -0.063 | -0.419 | -0.274 | 0.966   | 0.092  |
| 8/4/2017  | 0.209  | 0.000  | 0.181  | -0.014 | 1.245   | -0.514 |
| 8/7/2017  | 0.197  | 0.275  | 0.977  | 0.783  | -0.588  | 0.597  |
| 8/8/2017  | -0.192 | -0.187 | -0.140 | 0.050  | 1.067   | 0.000  |
| 8/9/2017  | -0.021 | -0.332 | 0.102  | -0.197 | 0.286   | 0.000  |
| 8/10/2017 | -1.467 | -1.155 | 0.167  | -0.125 | -0.966  | 1.011  |
| 8/11/2017 | 0.187  | -0.184 | -0.612 | 0.327  | 0.774   | 1.823  |
| 8/14/2017 | 1.084  | 0.811  | 0.344  | -0.717 | -0.422  | 2.365  |
| 8/15/2017 | -0.057 | -0.145 | -0.118 | -0.747 | -1.239  | -0.057 |
| 8/16/2017 | 0.177  | 0.246  | 0.320  | 0.157  | -1.865  | -0.923 |
| 8/17/2017 | -1.546 | -0.912 | -0.039 | -0.160 | -0.066  | -0.391 |
| 8/18/2017 | -0.226 | -0.325 | 0.310  | -0.080 | 2.011   | -0.355 |
| 8/21/2017 | 0.120  | 0.096  | 0.224  | 0.375  | 0.210   | 0.720  |
| 8/22/2017 | 0.993  | 0.661  | -0.272 | -0.567 | 0.248   | -0.099 |
| 8/23/2017 | -0.358 | -0.127 | 0.720  | 0.172  | 0.421   | 0.466  |
| 8/24/2017 | -0.187 | -0.127 | 0.552  | -0.394 | 0.027   | 0.688  |
| 8/25/2017 | 0.168  | 0.304  | 0.410  | 0.290  | 0.136   | 1.639  |
| 8/28/2017 | 0.072  | 0.108  | 1.099  | 0.875  | -1.405  | 0.770  |
| 8/29/2017 | 0.041  | -0.076 | 0.763  | 0.877  | 0.303   | -0.536 |
| 8/30/2017 | 0.369  | 0.126  | 0.483  | 0.949  | -1.073  | -0.665 |
| 8/31/2017 | 0.594  | 0.555  | 0.369  | -0.056 | 0.154   | -0.624 |
| 9/1/2017  | 0.213  | 0.351  | 0.214  | 0.000  | 0.000   | -4.262 |
| 9/5/2017  | -0.830 | -0.565 | 1.596  | 0.000  | 0.000   | -1.822 |
| 9/6/2017  | 0.231  | 0.252  | 1.787  | -0.418 | 1.683   | 0.453  |
| 9/7/2017  | -0.061 | 0.270  | 0.997  | 0.909  | -0.254  | 0.935  |

|            |        |        |        |        |        |        |
|------------|--------|--------|--------|--------|--------|--------|
| 9/8/2017   | -0.113 | 0.006  | 2.397  | 0.657  | -0.355 | 0.884  |
| 9/11/2017  | 1.139  | 0.942  | 1.925  | 0.525  | -0.371 | 0.573  |
| 9/12/2017  | 0.395  | 0.328  | 1.355  | -0.404 | -0.696 | -0.102 |
| 9/13/2017  | 0.072  | -0.080 | 4.084  | 0.183  | -0.223 | -1.338 |
| 9/14/2017  | -0.094 | -0.180 | 4.045  | 0.226  | -0.667 | 0.307  |
| 9/15/2017  | 0.170  | 0.229  | 2.493  | 0.071  | -0.731 | -0.089 |
| 9/18/2017  | 0.133  | 0.185  | -1.615 | -0.219 | -0.764 | -1.145 |
| 9/19/2017  | 0.122  | 0.278  | -2.895 | -0.276 | 0.331  | 0.817  |
| 9/20/2017  | 0.002  | 0.117  | -0.290 | -0.503 | 0.378  | 0.461  |
| 9/21/2017  | -0.344 | -0.413 | -0.358 | -0.346 | 0.182  | 0.589  |
| 9/22/2017  | 0.024  | 0.173  | 0.171  | 0.119  | 0.746  | -0.074 |
| 9/25/2017  | -0.249 | -0.327 | 1.539  | -0.259 | -0.374 | -0.199 |
| 9/26/2017  | 0.012  | -0.310 | 1.307  | -0.254 | -1.223 | -0.215 |
| 9/27/2017  | 0.338  | 0.192  | 1.429  | -0.804 | 0.144  | -0.546 |
| 9/28/2017  | 0.182  | 0.235  | 1.255  | -0.031 | 1.225  | -0.629 |
| 9/29/2017  | 0.371  | 0.462  | 0.375  | 0.024  | 0.275  | -0.566 |
| 10/2/2017  | 0.422  | 0.215  | -0.065 | 0.376  | -0.110 | -0.472 |
| 10/3/2017  | 0.224  | 0.306  | 0.656  | 0.185  | 0.012  | 0.169  |
| 10/4/2017  | 0.104  | 0.061  | 0.686  | 1.098  | 0.475  | -0.532 |
| 10/5/2017  | 0.518  | 0.263  | 1.942  | -0.324 | 0.531  | -0.218 |
| 10/6/2017  | -0.011 | -0.122 | -0.317 | -0.177 | 1.630  | -0.217 |
| 10/9/2017  | -0.212 | -0.067 | 1.496  | 0.230  | 0.972  | -0.447 |
| 10/10/2017 | 0.238  | 0.433  | 0.682  | -0.268 | -0.163 | -0.056 |
| 10/11/2017 | 0.229  | 0.158  | 2.275  | -0.112 | -0.339 | -1.002 |
| 10/12/2017 | -0.256 | -0.085 | 1.115  | 0.452  | -0.160 | -0.300 |
| 10/13/2017 | 0.096  | 0.231  | 1.230  | 0.175  | 0.210  | -0.314 |
| 10/16/2017 | 0.209  | 0.133  | 0.492  | -1.841 | 0.259  | -0.320 |
| 10/17/2017 | 0.121  | -0.109 | 0.066  | -0.307 | -0.278 | -0.510 |
| 10/18/2017 | 0.174  | 0.188  | -0.405 | 0.538  | -0.294 | -0.563 |
| 10/19/2017 | 0.080  | 0.121  | 0.281  | 0.410  | 0.096  | -0.999 |
| 10/20/2017 | 0.400  | 0.079  | -0.081 | -0.480 | -0.360 | 0.000  |
| 10/23/2017 | -0.393 | -0.290 | -0.230 | 0.520  | -1.099 | 0.000  |
| 10/24/2017 | 0.224  | 0.115  | -0.422 | 0.413  | 1.068  | 1.482  |
| 10/25/2017 | -0.435 | -0.382 | -0.236 | -0.088 | 0.608  | 0.000  |
| 10/26/2017 | 0.177  | 0.079  | -0.418 | -0.368 | -1.088 | 0.000  |
| 10/27/2017 | 0.982  | 0.442  | -0.070 | -0.261 | 0.169  | 0.000  |
| 10/30/2017 | -0.376 | 0.006  | 0.252  | 0.628  | 0.062  | 0.196  |
| 10/31/2017 | 0.101  | 0.097  | 0.749  | 0.768  | 0.230  | 1.049  |
| 11/1/2017  | 0.164  | 0.247  | 0.385  | 0.048  | 0.513  | 1.850  |
| 11/2/2017  | 0.045  | 0.078  | 0.130  | -0.377 | 0.324  | 0.275  |
| 11/3/2017  | 0.415  | 0.102  | -0.073 | 0.384  | -0.244 | 0.518  |
| 11/6/2017  | -0.008 | 0.042  | -0.062 | -0.541 | -0.023 | -0.591 |
| 11/7/2017  | -0.015 | -0.030 | 0.271  | -0.303 | -0.221 | -0.928 |
| 11/8/2017  | 0.186  | 0.186  | 0.468  | 0.332  | 0.343  | 0.483  |
| 11/9/2017  | -0.439 | -0.409 | 0.421  | 0.753  | -0.206 | -0.082 |
| 11/10/2017 | -0.058 | -0.102 | -0.378 | 0.975  | 0.236  | -0.590 |
| 11/13/2017 | 0.062  | -0.254 | -0.169 | 0.000  | -1.145 | -0.790 |

|            |        |        |        |        |        |        |
|------------|--------|--------|--------|--------|--------|--------|
| 11/14/2017 | -0.228 | -0.230 | 0.286  | 0.126  | -0.039 | -0.234 |
| 11/15/2017 | -0.522 | -0.547 | -0.493 | -0.339 | -0.700 | 1.187  |
| 11/16/2017 | 0.910  | 0.722  | -4.504 | -0.821 | 0.619  | 0.446  |
| 11/17/2017 | -0.342 | -0.151 | -6.717 | 0.044  | 0.104  | 0.147  |
| 11/20/2017 | 0.137  | 0.109  | -5.953 | -0.466 | 0.012  | 1.468  |
| 11/21/2017 | 0.676  | 0.585  | -5.556 | 0.079  | -1.416 | 2.137  |
| 11/22/2017 | -0.099 | 0.186  | -1.799 | 0.259  | 0.987  | 1.715  |
| 11/24/2017 | 0.224  | 0.485  | -0.631 | 1.019  | 0.713  | -1.616 |
| 11/27/2017 | 0.001  | -0.287 | 2.753  | 0.203  | -0.138 | 0.816  |
| 11/28/2017 | 0.977  | 0.568  | 2.701  | 0.841  | 0.376  | 0.000  |
| 11/29/2017 | -0.047 | -0.024 | 2.437  | 0.260  | 0.798  | 0.000  |
| 11/30/2017 | 0.710  | 0.446  | 0.466  | -0.052 | 0.727  | 0.158  |
| 12/1/2017  | -0.192 | -0.351 | -0.072 | 0.000  | 0.000  | -0.364 |
| 12/4/2017  | -0.096 | 0.167  | -1.295 | 0.000  | 0.000  | -0.004 |
| 12/5/2017  | -0.370 | -0.345 | -2.588 | -0.554 | 1.354  | -0.477 |
| 12/6/2017  | -0.049 | -0.341 | -0.760 | -1.196 | 2.573  | 0.073  |
| 12/7/2017  | 0.201  | 0.203  | -0.014 | 0.199  | 1.262  | 0.258  |
| 12/8/2017  | 0.561  | 0.471  | -1.796 | -0.101 | -0.349 | -0.037 |
| 12/11/2017 | 0.400  | 0.404  | -0.231 | 0.142  | -1.482 | 0.419  |
| 12/12/2017 | 0.208  | 0.124  | 0.452  | 1.023  | 0.260  | 0.000  |
| 12/13/2017 | -0.097 | 0.041  | -0.806 | -0.181 | -1.549 | 0.000  |
| 12/14/2017 | -0.384 | -0.349 | -0.160 | 0.326  | -1.751 | -0.608 |
| 12/15/2017 | 0.920  | 0.391  | -0.035 | -0.248 | 1.208  | -0.205 |
| 12/18/2017 | 0.573  | 0.888  | 0.872  | -0.246 | -0.347 | -0.981 |
| 12/19/2017 | -0.338 | -0.376 | -0.567 | -0.332 | -0.187 | -0.077 |
| 12/20/2017 | -0.082 | -0.024 | 0.248  | 0.001  | 0.318  | 0.188  |
| 12/21/2017 | 0.124  | 0.241  | -0.636 | -0.062 | 0.518  | 0.626  |
| 12/22/2017 | -0.071 | -0.065 | 0.397  | -0.386 | 0.160  | 0.133  |
| 12/26/2017 | -0.179 | -0.053 | -0.449 | 1.496  | -0.015 | 0.000  |
| 12/27/2017 | 0.088  | 0.200  | 1.959  | 0.151  | -0.678 | 0.000  |
| 12/28/2017 | 0.170  | 0.211  | -0.792 | 0.846  | 1.052  | -0.239 |
| 12/29/2017 | -0.542 | -0.152 | 1.690  | 0.420  | 0.652  | 1.172  |
| 1/2/2018   | 0.789  | 0.677  | -0.967 | 0.280  | -0.224 | 0.140  |
| 1/3/2018   | 0.521  | 0.412  | 0.833  | -0.068 | 0.338  | -0.185 |
| 1/4/2018   | 0.497  | 0.825  | 0.015  | -0.228 | 2.579  | 0.490  |
| 1/5/2018   | 0.716  | 0.642  | -0.077 | 0.088  | 0.681  | 1.440  |
| 1/8/2018   | 0.072  | 0.017  | -0.251 | 0.286  | 1.708  | 0.037  |
| 1/9/2018   | 0.121  | 0.091  | 0.304  | 0.448  | 1.556  | 0.177  |
| 1/10/2018  | -0.156 | -0.051 | -0.450 | 0.386  | 3.685  | -0.058 |
| 1/11/2018  | 0.626  | 0.404  | -0.100 | 0.311  | 3.641  | 0.391  |
| 1/12/2018  | 0.776  | 0.652  | 0.079  | 0.953  | -1.264 | 0.775  |
| 1/16/2018  | -0.249 | 0.181  | 0.129  | 0.956  | 3.731  | 1.207  |
| 1/17/2018  | 0.941  | 0.512  | -0.289 | 0.181  | 1.002  | 0.237  |
| 1/18/2018  | -0.137 | -0.050 | -0.716 | 0.313  | 0.382  | 0.616  |
| 1/19/2018  | 0.411  | 0.431  | -0.529 | 0.228  | 1.237  | 1.109  |
| 1/22/2018  | 0.784  | 0.602  | 0.529  | -0.130 | -0.686 | -0.026 |
| 1/23/2018  | 0.185  | 0.432  | 0.083  | -0.179 | -2.076 | 0.194  |

|           |        |        |        |        |        |        |
|-----------|--------|--------|--------|--------|--------|--------|
| 1/24/2018 | -0.117 | 0.077  | 0.456  | 0.503  | -1.370 | -0.652 |
| 1/25/2018 | 0.018  | 0.088  | 0.477  | 0.616  | -0.032 | 0.611  |
| 1/26/2018 | 1.203  | 0.693  | -0.257 | -0.406 | 1.061  | 0.745  |
| 1/29/2018 | -0.661 | -0.649 | -0.574 | 0.235  | 0.466  | -0.015 |
| 1/30/2018 | -1.172 | -0.982 | 0.335  | 0.176  | 0.383  | -0.100 |
| 1/31/2018 | 0.071  | 0.033  | 0.252  | -0.220 | -0.686 | 0.237  |
| 2/1/2018  | -0.222 | -0.078 | 0.036  | 1.171  | 0.075  | 0.650  |
| 2/2/2018  | -2.087 | -1.863 | -0.134 | -0.036 | 0.511  | 0.441  |
| 2/5/2018  | -4.155 | -3.109 | 0.154  | -0.669 | 0.075  | 0.524  |
| 2/6/2018  | 1.881  | -0.176 | -0.533 | -1.468 | -1.701 | -0.231 |
| 2/7/2018  | -0.503 | 0.012  | 0.039  | 0.134  | -0.057 | -1.396 |
| 2/8/2018  | -3.907 | -2.689 | -0.822 | 0.012  | -0.323 | 1.266  |
| 2/9/2018  | 1.558  | 0.205  | -0.063 | -0.111 | -1.181 | -0.393 |
| 2/12/2018 | 1.389  | 1.232  | 0.217  | -0.297 | -3.153 | -1.192 |
| 2/13/2018 | 0.334  | 0.249  | -0.082 | 0.201  | -0.511 | 0.259  |
| 2/14/2018 | 1.306  | 1.290  | 0.786  | 0.100  | 2.255  | 0.323  |
| 2/15/2018 | 1.210  | 1.112  | 0.212  | 1.188  | 1.835  | -0.348 |
| 2/16/2018 | 0.078  | 0.306  | 0.051  | 0.069  | -0.529 | 0.503  |
| 2/20/2018 | -0.572 | -0.637 | -0.595 | -0.079 | -1.678 | 0.752  |
| 2/21/2018 | -0.568 | -0.372 | 0.303  | 0.094  | 0.940  | -0.207 |
| 2/22/2018 | 0.093  | -0.006 | -0.232 | 0.324  | 0.375  | -0.961 |
| 2/23/2018 | 1.547  | 1.119  | -0.348 | 0.065  | 0.547  | 0.256  |
| 2/26/2018 | 1.225  | 0.947  | 0.176  | -0.309 | -0.116 | -0.009 |
| 2/27/2018 | -1.261 | -0.877 | -0.089 | 0.016  | -0.305 | 0.294  |
| 2/28/2018 | -1.074 | -1.147 | -1.119 | -0.150 | 1.277  | 1.229  |
| 3/1/2018  | -1.356 | -1.261 | 0.057  | 0.125  | -1.232 | 0.643  |
| 3/2/2018  | 0.484  | -0.124 | -0.383 | 0.434  | 0.607  | -0.360 |
| 3/5/2018  | 1.035  | 0.777  | -0.177 | 0.656  | -0.263 | 0.016  |
| 3/6/2018  | 0.279  | 0.561  | 0.615  | 1.116  | 0.512  | 0.339  |
| 3/7/2018  | -0.033 | -0.122 | 0.105  | 1.009  | -0.943 | 0.813  |
| 3/8/2018  | 0.527  | 0.402  | -0.260 | 0.563  | 0.837  | -0.371 |
| 3/9/2018  | 1.713  | 1.121  | -0.062 | 0.166  | -0.153 | -0.008 |
| 3/12/2018 | -0.005 | 0.287  | 0.117  | 0.492  | -1.104 | 0.334  |
| 3/13/2018 | -0.628 | -0.402 | 0.474  | 0.683  | -0.204 | 1.049  |
| 3/14/2018 | -0.562 | -0.496 | -0.042 | -0.212 | -0.478 | 0.924  |
| 3/15/2018 | -0.059 | -0.064 | -0.178 | 0.402  | -1.801 | -0.266 |
| 3/16/2018 | 0.100  | 0.098  | -0.378 | -0.036 | -1.174 | 1.095  |
| 3/19/2018 | -1.375 | -1.110 | -0.267 | 0.067  | 0.305  | 1.702  |
| 3/20/2018 | 0.180  | 0.029  | 0.464  | -0.403 | -0.897 | 0.391  |
| 3/21/2018 | -0.342 | -0.117 | -0.198 | -0.812 | 0.381  | 1.407  |
| 3/22/2018 | -2.613 | -1.723 | 0.145  | 0.051  | 0.161  | 0.599  |
| 3/23/2018 | -2.297 | -1.893 | -0.013 | 0.262  | 1.115  | 0.212  |
| 3/26/2018 | 2.855  | 1.648  | 0.739  | 0.407  | 0.662  | -0.413 |
| 3/27/2018 | -1.790 | -0.635 | 0.119  | -0.016 | 0.257  | -0.182 |
| 3/28/2018 | -0.244 | -0.373 | -0.995 | -0.143 | -2.205 | -0.182 |
| 3/29/2018 | 1.270  | 0.852  | -0.403 | 0.133  | 1.499  | 0.825  |
| 4/2/2018  | -2.274 | -1.281 | -0.091 | 0.542  | 0.000  | 0.000  |

|           |        |        |        |        |        |        |
|-----------|--------|--------|--------|--------|--------|--------|
| 4/3/2018  | 1.249  | 0.489  | 0.020  | -1.223 | 0.000  | 0.000  |
| 4/4/2018  | 1.302  | 0.583  | 0.040  | 0.407  | -0.275 | 0.720  |
| 4/5/2018  | 0.575  | 0.948  | -0.206 | -0.400 | -0.017 | 0.900  |
| 4/6/2018  | -2.227 | -1.362 | -0.181 | -0.002 | 0.446  | -0.538 |
| 4/9/2018  | 0.336  | 0.408  | 0.303  | 0.258  | -0.662 | -0.605 |
| 4/10/2018 | 1.612  | 1.433  | 0.072  | 0.829  | -1.276 | 0.310  |
| 4/11/2018 | -0.650 | -0.349 | 0.979  | 0.479  | 1.073  | 0.455  |
| 4/12/2018 | 0.915  | 0.396  | 0.150  | -0.769 | -0.522 | -0.550 |
| 4/13/2018 | -0.383 | -0.106 | 0.367  | 0.234  | 0.380  | -0.615 |
| 4/16/2018 | 0.825  | 0.454  | -0.047 | -0.416 | -0.257 | -0.679 |
| 4/17/2018 | 1.064  | 0.732  | 1.382  | 0.367  | 0.757  | -1.170 |
| 4/18/2018 | -0.033 | 0.373  | -0.041 | -0.014 | 0.296  | -1.376 |
| 4/19/2018 | -0.481 | -0.233 | 0.618  | 0.491  | -0.360 | -0.580 |
| 4/20/2018 | -0.936 | -0.843 | -0.010 | 0.091  | 0.423  | 0.402  |
| 4/23/2018 | -0.003 | -0.118 | -0.481 | -0.097 | 0.462  | -1.183 |
| 4/24/2018 | -1.278 | -0.703 | -0.298 | 0.382  | -0.094 | -0.249 |
| 4/25/2018 | 0.208  | -0.202 | 0.701  | -0.228 | -0.328 | -0.003 |
| 4/26/2018 | 0.941  | 0.775  | -0.145 | 0.697  | -0.158 | -0.748 |
| 4/27/2018 | 0.304  | 0.265  | 0.559  | 0.376  | 0.633  | -0.279 |
| 4/30/2018 | -0.859 | -0.400 | -0.114 | -0.226 | 0.721  | 0.193  |
| 5/1/2018  | 0.399  | -0.124 | 0.000  | 0.000  | 0.000  | 0.000  |
| 5/2/2018  | -0.768 | -0.432 | 0.000  | 0.000  | 0.000  | 0.000  |
| 5/3/2018  | -0.219 | -0.279 | 0.022  | -0.725 | 0.463  | -0.323 |
| 5/4/2018  | 1.357  | 0.841  | 0.356  | 0.183  | -0.316 | 1.841  |
| 5/7/2018  | 0.304  | 0.318  | 0.254  | -1.066 | -0.451 | 0.049  |
| 5/8/2018  | -0.128 | -0.100 | -0.342 | -0.031 | -0.409 | -0.176 |
| 5/9/2018  | 0.867  | 0.663  | 0.410  | -0.756 | -0.293 | 0.989  |
| 5/10/2018 | 0.978  | 0.734  | 0.200  | -0.882 | 0.300  | -0.968 |
| 5/11/2018 | 0.203  | 0.417  | 0.177  | 0.080  | -0.148 | -0.685 |
| 5/14/2018 | 0.122  | 0.208  | 0.218  | -0.679 | -0.859 | -0.315 |
| 5/15/2018 | -0.780 | -0.811 | -0.008 | -0.661 | -0.764 | -0.481 |
| 5/16/2018 | 0.442  | 0.169  | 0.043  | -0.504 | 0.168  | 1.008  |
| 5/17/2018 | -0.203 | 0.023  | -0.675 | -0.266 | -0.854 | 0.191  |
| 5/18/2018 | -0.343 | -0.291 | 0.034  | -0.175 | -0.650 | -0.082 |
| 5/21/2018 | 0.703  | 0.436  | -0.369 | -0.791 | -0.017 | -1.081 |
| 5/22/2018 | -0.185 | 0.012  | 0.426  | -0.386 | -0.623 | -0.290 |
| 5/23/2018 | 0.262  | -0.308 | -0.219 | -0.348 | -0.252 | -0.801 |
| 5/24/2018 | -0.141 | -0.280 | 0.147  | 0.043  | -1.253 | -0.612 |
| 5/25/2018 | -0.103 | -0.345 | -0.074 | 0.093  | -1.690 | -0.934 |
| 5/29/2018 | -1.264 | -1.391 | -0.216 | 0.168  | -1.932 | -0.395 |
| 5/30/2018 | 1.135  | 0.727  | 0.000  | -0.473 | -0.549 | -0.423 |
| 5/31/2018 | -0.650 | -0.366 | 1.034  | -0.755 | -0.678 | -0.450 |
| 6/1/2018  | 1.152  | 0.807  | 1.035  | -0.268 | -0.747 | 0.000  |
| 6/4/2018  | 0.576  | 0.655  | 0.590  | 0.021  | 0.022  | 0.000  |
| 6/5/2018  | 0.070  | -0.157 | 0.606  | -1.027 | 3.609  | 0.910  |
| 6/6/2018  | 0.876  | 0.825  | 0.879  | 0.352  | 0.652  | 1.611  |
| 6/7/2018  | -0.144 | -0.006 | 1.009  | 1.098  | 0.512  | 0.295  |

|           |        |        |        |        |        |        |
|-----------|--------|--------|--------|--------|--------|--------|
| 6/8/2018  | 0.267  | -0.035 | 0.049  | -0.182 | -1.562 | -0.397 |
| 6/11/2018 | 0.097  | 0.312  | 0.310  | -0.194 | 0.170  | 0.445  |
| 6/12/2018 | 0.169  | 0.029  | 0.732  | -0.104 | 0.022  | -0.204 |
| 6/13/2018 | -0.512 | -0.277 | -0.457 | 0.422  | -0.388 | -0.401 |
| 6/14/2018 | 0.232  | -0.017 | -0.337 | -0.554 | -0.796 | 0.028  |
| 6/15/2018 | -0.005 | -0.394 | -1.077 | 0.000  | -0.048 | 0.000  |
| 6/18/2018 | -0.324 | -0.478 | -0.832 | 0.000  | 0.344  | 0.000  |
| 6/19/2018 | -0.396 | -0.650 | -1.931 | -1.130 | -1.676 | -1.768 |
| 6/20/2018 | -0.026 | 0.235  | -0.208 | 0.468  | 0.652  | -1.424 |
| 6/21/2018 | -0.621 | -0.564 | -1.119 | 0.062  | -0.555 | 0.264  |
| 6/22/2018 | 0.079  | 0.447  | -0.194 | 0.553  | -0.268 | 1.099  |
| 6/25/2018 | -1.345 | -1.341 | -0.931 | -0.141 | 0.327  | -0.049 |
| 6/26/2018 | 0.159  | 0.119  | -1.361 | -1.105 | -0.271 | 0.153  |
| 6/27/2018 | -0.966 | -0.602 | -0.754 | -0.308 | -0.335 | 0.494  |
| 6/28/2018 | 0.655  | 0.191  | -0.086 | 0.445  | -0.198 | -0.310 |
| 6/29/2018 | 0.078  | 0.553  | 0.355  | -0.150 | 0.440  | -0.621 |
| 7/2/2018  | 0.392  | -0.357 | 0.198  | -0.293 | -0.897 | -0.636 |
| 7/3/2018  | -0.605 | -0.018 | 0.253  | -0.690 | -0.648 | -1.309 |
| 7/5/2018  | 0.887  | 0.677  | 0.310  | -0.345 | 0.509  | 1.640  |
| 7/6/2018  | 0.846  | 0.825  | 0.299  | 0.371  | 0.824  | 0.203  |
| 7/9/2018  | 0.866  | 0.812  | 0.735  | -0.801 | -0.828 | 0.684  |
| 7/10/2018 | 0.380  | 0.227  | -0.469 | 0.174  | -0.698 | 0.412  |
| 7/11/2018 | -0.706 | -0.927 | -0.106 | -0.641 | -0.551 | -0.897 |
| 7/12/2018 | 0.877  | 0.683  | 0.157  | -0.475 | 0.011  | -0.266 |
| 7/13/2018 | 0.112  | 0.262  | 0.857  | -0.554 | -0.095 | -0.198 |
| 7/16/2018 | 0.037  | -0.046 | 0.516  | -0.401 | 0.076  | 0.182  |
| 7/17/2018 | 0.478  | 0.220  | 0.540  | -1.240 | -1.176 | -0.014 |
| 7/18/2018 | 0.159  | 0.174  | -0.230 | -0.122 | -1.370 | 0.742  |
| 7/19/2018 | -0.386 | -0.342 | 2.655  | -0.569 | -1.631 | 0.596  |
| 7/20/2018 | -0.142 | 0.243  | 1.741  | 1.076  | 0.846  | -0.414 |
| 7/23/2018 | 0.281  | 0.023  | 0.668  | 0.334  | 0.839  | 0.101  |
| 7/24/2018 | 0.487  | 0.577  | -0.301 | 0.683  | -0.148 | 0.120  |
| 7/25/2018 | 0.971  | 0.568  | -1.271 | -0.439 | -0.247 | 0.436  |
| 7/26/2018 | 0.142  | -0.132 | 0.115  | 0.318  | 0.141  | 0.096  |
| 7/27/2018 | -0.619 | -0.212 | -0.389 | 0.514  | 1.055  | -0.221 |
| 7/30/2018 | -0.455 | -0.288 | 0.106  | 0.560  | 1.014  | -0.330 |
| 7/31/2018 | 0.438  | 0.219  | 0.094  | 0.781  | -0.550 | -1.125 |
| 8/1/2018  | 0.077  | -0.109 | -0.136 | -0.008 | -0.867 | 0.021  |
| 8/2/2018  | 0.517  | -0.115 | -0.448 | 0.554  | 0.520  | 0.664  |
| 8/3/2018  | 0.515  | 0.454  | 0.114  | -0.225 | 0.213  | 0.268  |
| 8/6/2018  | 0.224  | 0.086  | -0.777 | -0.586 | 0.147  | -0.255 |
| 8/7/2018  | 0.273  | 0.400  | 0.208  | 0.491  | -1.195 | 0.272  |
| 8/8/2018  | 0.075  | 0.000  | -0.684 | 0.310  | -0.254 | 1.238  |
| 8/9/2018  | -0.113 | -0.143 | -0.612 | -0.004 | -0.533 | 0.428  |
| 8/10/2018 | -0.798 | -1.201 | -0.690 | -0.719 | -0.481 | -0.340 |
| 8/13/2018 | -0.383 | -0.562 | -0.385 | -1.656 | -0.917 | -0.008 |
| 8/14/2018 | 0.605  | 0.510  | 0.049  | -0.531 | 0.422  | 0.410  |

|            |        |        |         |        |        |        |
|------------|--------|--------|---------|--------|--------|--------|
| 8/15/2018  | -0.604 | -0.918 | -0.388  | -0.208 | -1.014 | -0.447 |
| 8/16/2018  | 0.823  | 0.675  | 0.036   | 0.037  | -0.547 | -0.746 |
| 8/17/2018  | 0.358  | 0.324  | 0.377   | 0.512  | 0.719  | 0.286  |
| 8/20/2018  | 0.219  | 0.283  | -0.051  | 0.075  | -2.366 | -0.367 |
| 8/21/2018  | 0.180  | 0.294  | 1.354   | 0.000  | 0.000  | 0.000  |
| 8/22/2018  | -0.065 | 0.264  | -0.742  | 0.000  | 0.000  | 0.000  |
| 8/23/2018  | -0.134 | -0.310 | -0.228  | 0.000  | 0.090  | -0.453 |
| 8/24/2018  | 0.597  | 0.556  | 1.073   | -0.091 | -0.201 | -0.134 |
| 8/27/2018  | 0.806  | 0.854  | -0.031  | -0.194 | 1.141  | -1.447 |
| 8/28/2018  | 0.076  | 0.142  | -0.239  | 1.339  | 0.972  | 0.591  |
| 8/29/2018  | 0.644  | 0.441  | -0.099  | 0.161  | -0.992 | -0.154 |
| 8/30/2018  | -0.452 | -0.429 | 0.048   | 0.411  | -1.886 | -0.603 |
| 8/31/2018  | 0.085  | -0.232 | 0.304   | -0.374 | -1.460 | -2.958 |
| 9/4/2018   | -0.194 | -0.603 | -1.337  | -1.080 | 0.922  | 0.057  |
| 9/5/2018   | -0.316 | -0.475 | -0.257  | -0.776 | -1.477 | -1.002 |
| 9/6/2018   | -0.403 | -0.448 | 1.351   | -0.503 | -1.807 | -0.631 |
| 9/7/2018   | -0.270 | -0.300 | 0.777   | -0.748 | 0.808  | -0.707 |
| 9/10/2018  | 0.191  | 0.219  | -0.010  | -0.227 | -1.791 | -0.583 |
| 9/11/2018  | 0.357  | 0.196  | -0.592  | 0.000  | -2.808 | -1.041 |
| 9/12/2018  | -0.093 | 0.155  | -0.292  | 0.000  | -1.758 | -0.788 |
| 9/13/2018  | 0.663  | 0.499  | -0.406  | 0.033  | -0.760 | -1.677 |
| 9/14/2018  | -0.053 | 0.194  | -0.540  | -0.336 | 2.304  | 0.899  |
| 9/17/2018  | -0.648 | -0.291 | -0.897  | -1.809 | -0.412 | -0.427 |
| 9/18/2018  | 0.443  | 0.491  | 0.353   | 0.423  | 0.808  | 0.235  |
| 9/19/2018  | 0.113  | 0.279  | -0.597  | -1.722 | -0.058 | -1.446 |
| 9/20/2018  | 0.896  | 0.921  | 0.140   | 0.445  | 0.546  | -4.668 |
| 9/21/2018  | -0.104 | 0.259  | -0.067  | -0.013 | 0.789  | -1.872 |
| 9/24/2018  | -0.455 | -0.320 | -0.103  | 0.004  | -0.207 | 2.429  |
| 9/25/2018  | -0.158 | 0.056  | -0.111  | 1.071  | 1.758  | 0.163  |
| 9/26/2018  | -0.376 | -0.225 | 0.486   | 1.029  | 0.065  | 0.532  |
| 9/27/2018  | 0.288  | 0.034  | 0.751   | 0.087  | -0.429 | 0.148  |
| 9/28/2018  | 0.033  | -0.271 | 0.110   | -0.458 | 0.126  | -0.697 |
| 10/1/2018  | 0.376  | 0.209  | 0.471   | -1.015 | -0.143 | -0.309 |
| 10/2/2018  | -0.005 | -0.215 | 3.027   | -0.107 | 0.013  | -0.121 |
| 10/3/2018  | 0.032  | 0.034  | 1.169   | -0.351 | 0.100  | 0.073  |
| 10/4/2018  | -0.817 | -0.863 | -1.144  | -0.714 | -0.078 | 0.321  |
| 10/5/2018  | -0.545 | -0.612 | 0.520   | -0.457 | -0.592 | 0.023  |
| 10/8/2018  | -0.015 | -0.293 | 2.917   | -1.728 | 0.405  | -0.338 |
| 10/9/2018  | -0.217 | -0.161 | 8.150   | 0.143  | -0.009 | -0.171 |
| 10/10/2018 | -3.237 | -2.273 | 8.461   | 0.055  | -0.061 | 0.000  |
| 10/11/2018 | -2.064 | -2.205 | 9.826   | -1.064 | -0.646 | 0.000  |
| 10/12/2018 | 1.479  | 0.977  | -2.166  | -0.057 | 0.332  | -2.303 |
| 10/15/2018 | -0.711 | -0.461 | -10.316 | 0.958  | 0.557  | -1.758 |
| 10/16/2018 | 2.132  | 1.777  | 0.681   | 0.744  | 0.108  | 0.626  |
| 10/17/2018 | 0.013  | -0.047 | 1.536   | 0.051  | -0.522 | -0.139 |
| 10/18/2018 | -1.508 | -1.221 | 1.228   | -0.806 | 0.105  | 0.670  |
| 10/19/2018 | 0.054  | 0.018  | 0.319   | -0.087 | 0.217  | 1.611  |

|            |        |        |         |        |        |        |
|------------|--------|--------|---------|--------|--------|--------|
| 10/22/2018 | -0.396 | -0.358 | 0.626   | 0.344  | 0.360  | 0.268  |
| 10/23/2018 | -0.446 | -0.962 | -1.116  | -0.112 | -0.217 | -0.544 |
| 10/24/2018 | -3.080 | -2.224 | 0.472   | -1.325 | -0.291 | -0.116 |
| 10/25/2018 | 2.011  | 0.892  | -2.210  | -0.970 | 0.100  | 0.533  |
| 10/26/2018 | -1.769 | -1.158 | -2.288  | -0.051 | 0.013  | -0.204 |
| 10/29/2018 | -0.586 | -0.236 | -0.301  | -0.137 | 1.231  | -0.683 |
| 10/30/2018 | 1.401  | 1.001  | -0.518  | -0.417 | -1.170 | -0.484 |
| 10/31/2018 | 1.053  | 1.119  | -1.238  | 0.229  | -2.231 | -0.833 |
| 11/1/2018  | 1.001  | 0.835  | -1.253  | -0.009 | -0.316 | 0.408  |
| 11/2/2018  | -0.737 | -0.145 | -0.949  | -0.042 | 0.400  | 1.907  |
| 11/5/2018  | 0.437  | 0.181  | 0.402   | 0.193  | -0.521 | -0.877 |
| 11/6/2018  | 0.589  | 0.451  | -0.861  | 0.442  | 0.334  | -1.962 |
| 11/7/2018  | 2.183  | 1.625  | -0.320  | 0.880  | -0.254 | 0.184  |
| 11/8/2018  | -0.164 | -0.053 | 1.092   | 0.854  | 0.347  | 0.373  |
| 11/9/2018  | -0.903 | -0.902 | 0.825   | 0.114  | -0.138 | 1.191  |
| 11/12/2018 | -1.910 | -1.586 | 0.483   | -0.959 | -0.508 | -0.139 |
| 11/13/2018 | -0.056 | -0.115 | 1.755   | 0.101  | 0.098  | -0.570 |
| 11/14/2018 | -0.833 | -0.639 | 1.384   | 0.147  | -0.076 | -0.271 |
| 11/15/2018 | 1.118  | 0.651  | -0.090  | 0.944  | -1.400 | -0.845 |
| 11/16/2018 | 0.248  | 0.284  | 0.882   | 0.159  | 1.761  | 0.224  |
| 11/19/2018 | -1.583 | -1.045 | 0.225   | 1.211  | -0.143 | -0.212 |
| 11/20/2018 | -1.861 | -1.706 | -6.403  | 0.000  | -0.058 | -0.049 |
| 11/21/2018 | 0.230  | 0.366  | 0.391   | 0.000  | -0.842 | 0.195  |
| 11/23/2018 | -0.588 | -0.540 | 0.593   | -0.689 | -0.104 | -0.275 |
| 11/26/2018 | 1.588  | 1.200  | 0.402   | -2.019 | -1.580 | 0.384  |
| 11/27/2018 | 0.410  | 0.154  | -0.203  | 0.416  | -0.896 | 0.177  |
| 11/28/2018 | 2.342  | 1.475  | -0.338  | 0.480  | -0.472 | 0.647  |
| 11/29/2018 | -0.372 | 0.181  | 1.333   | 0.265  | -1.449 | 0.261  |
| 11/30/2018 | 0.959  | 0.368  | -0.550  | 0.080  | 1.597  | 0.759  |
| 12/3/2018  | 1.047  | 1.256  | -0.263  | -0.941 | 0.231  | 0.130  |
| 12/4/2018  | -3.304 | -2.332 | -0.994  | -0.511 | 1.523  | 0.208  |
| 12/6/2018  | -0.127 | -1.353 | -0.955  | -0.866 | -1.791 | -0.492 |
| 12/7/2018  | -2.527 | -1.322 | 0.609   | -0.514 | 0.430  | -0.686 |
| 12/10/2018 | 0.131  | -0.620 | -0.212  | 0.302  | -0.509 | -1.019 |
| 12/11/2018 | -0.063 | 0.107  | -0.538  | 0.674  | -0.158 | -1.050 |
| 12/12/2018 | 0.492  | 1.018  | -0.482  | 0.394  | -0.498 | 0.000  |
| 12/13/2018 | 0.069  | 0.056  | -0.931  | 0.152  | -0.112 | 0.000  |
| 12/14/2018 | -2.010 | -1.552 | -0.222  | -0.827 | 0.517  | 0.648  |
| 12/17/2018 | -2.140 | -1.423 | -1.572  | 1.169  | -0.219 | -0.356 |
| 12/18/2018 | 0.172  | -0.308 | -0.468  | -0.215 | 0.223  | -0.344 |
| 12/19/2018 | -1.454 | -0.773 | 0.341   | 0.169  | -0.447 | -0.639 |
| 12/20/2018 | -1.502 | -1.512 | -0.548  | 0.332  | -0.571 | 0.026  |
| 12/21/2018 | -2.040 | -1.455 | -66.683 | 0.071  | 0.188  | -1.055 |
| 12/24/2018 | -2.735 | -1.775 | -0.531  | -1.335 | 3.283  | 1.129  |
| 12/26/2018 | 4.810  | 2.604  | -0.071  | 0.288  | 0.208  | 0.000  |
| 12/27/2018 | 0.823  | 0.573  | 0.047   | 0.549  | -1.070 | 0.000  |
| 12/28/2018 | -0.067 | 0.452  | 0.371   | -0.079 | -1.012 | 0.588  |

|            |        |        |        |        |        |        |
|------------|--------|--------|--------|--------|--------|--------|
| 12/31/2018 | 0.898  | 0.697  | -0.019 | 0.738  | 0.512  | -0.861 |
| 1/2/2019   | 0.027  | -0.130 | 0.137  | 0.061  | -0.892 | -0.597 |
| 1/3/2019   | -2.561 | -1.514 | -0.079 | -0.091 | -2.395 | -0.530 |
| 1/4/2019   | 3.364  | 2.658  | 0.287  | -0.171 | -0.625 | -1.312 |
| 1/7/2019   | 0.661  | 0.781  | 0.447  | 0.042  | -0.652 | 0.182  |
| 1/8/2019   | 0.951  | 0.756  | 0.085  | -0.200 | -2.742 | 0.891  |
| 1/9/2019   | 0.266  | 0.751  | 0.124  | -0.008 | -0.670 | 0.683  |
| 1/10/2019  | 0.341  | 0.370  | 0.149  | -0.023 | 2.217  | 1.599  |
| 1/11/2019  | 0.026  | 0.013  | -0.102 | 0.035  | 0.660  | 0.506  |
| 1/14/2019  | -0.603 | -0.433 | 0.375  | -0.445 | -0.102 | 0.296  |
| 1/15/2019  | 1.130  | 0.820  | -0.245 | 1.218  | 0.522  | 0.268  |
| 1/16/2019  | 0.345  | 0.125  | 0.625  | -0.118 | -0.111 | 1.066  |
| 1/17/2019  | 0.691  | 0.423  | -0.165 | 0.315  | -0.518 | 0.499  |
| 1/18/2019  | 1.259  | 1.239  | 0.107  | 0.050  | 0.039  | 0.673  |
| 1/22/2019  | -1.362 | -1.041 | -0.362 | 0.481  | -0.131 | 0.738  |
| 1/23/2019  | 0.330  | 0.130  | 0.273  | 0.426  | 0.889  | 0.311  |
| 1/24/2019  | -0.015 | 0.087  | 0.253  | 0.123  | 0.695  | 0.088  |
| 1/25/2019  | 0.769  | 0.873  | -0.107 | 0.340  | 2.001  | 1.339  |
| 1/28/2019  | -0.896 | -0.694 | -0.129 | 1.925  | -0.418 | 0.544  |
| 1/29/2019  | -0.234 | -0.012 | 0.064  | 0.383  | -0.888 | 0.765  |
| 1/30/2019  | 1.515  | 1.067  | 0.134  | 0.442  | 0.019  | 0.485  |
| 1/31/2019  | 0.696  | 0.844  | 0.593  | -0.248 | -2.022 | 1.279  |
| 2/1/2019   | -0.129 | -0.006 | 0.066  | 0.006  | 1.035  | 2.174  |
| 2/4/2019   | 0.659  | 0.356  | -0.102 | 0.802  | 0.416  | 0.772  |
| 2/5/2019   | 0.501  | 0.631  | -0.394 | 1.116  | -0.162 | 1.843  |
| 2/6/2019   | -0.193 | -0.186 | -0.477 | 0.286  | 1.136  | 1.552  |
| 2/7/2019   | -0.929 | -1.013 | -0.268 | -0.366 | 3.806  | -0.018 |
| 2/8/2019   | -0.051 | -0.328 | 0.332  | 0.071  | 1.176  | -0.133 |
| 2/11/2019  | 0.048  | 0.018  | -0.467 | 0.001  | 0.931  | 0.060  |
| 2/12/2019  | 1.286  | 1.095  | 0.625  | 1.172  | 0.812  | 0.377  |
| 2/13/2019  | 0.303  | 0.372  | -1.004 | 0.001  | -1.590 | 0.044  |
| 2/14/2019  | -0.345 | -0.204 | -0.299 | -0.014 | 0.573  | -0.825 |
| 2/15/2019  | 1.048  | 0.879  | 0.021  | -0.318 | 0.485  | -0.984 |
| 2/19/2019  | 0.191  | 0.457  | 0.512  | 0.959  | -0.615 | -1.036 |
| 2/20/2019  | 0.127  | 0.384  | 0.948  | 0.030  | 0.704  | -0.857 |
| 2/21/2019  | -0.199 | -0.183 | 0.614  | -0.291 | -0.040 | -0.024 |
| 2/22/2019  | 0.683  | 0.431  | -0.239 | -0.494 | -0.213 | -0.141 |
| 2/25/2019  | 0.090  | 0.224  | -0.177 | -0.910 | 0.369  | 0.350  |
| 2/26/2019  | -0.038 | 0.047  | -0.003 | 0.200  | -0.160 | -0.063 |
| 2/27/2019  | -0.159 | -0.029 | 0.225  | -0.798 | -1.724 | -0.332 |
| 2/28/2019  | -0.303 | -0.436 | 0.317  | -0.157 | -2.247 | -0.947 |
| 3/1/2019   | 0.660  | 0.453  | -0.516 | 0.319  | 0.028  | 0.095  |
| 3/4/2019   | -0.406 | -0.300 | -0.322 | -0.051 | 2.192  | 0.324  |
| 3/5/2019   | -0.118 | -0.130 | -0.704 | -0.561 | 0.689  | 0.055  |
| 3/6/2019   | -0.663 | -0.414 | -0.318 | -0.339 | -0.441 | 1.120  |
| 3/7/2019   | -0.833 | -0.797 | -0.418 | 0.585  | -0.837 | 1.279  |
| 3/8/2019   | -0.158 | -0.491 | -0.941 | -0.091 | -0.036 | 0.241  |

|           |        |        |        |        |        |        |
|-----------|--------|--------|--------|--------|--------|--------|
| 3/11/2019 | 1.575  | 1.222  | 0.355  | 0.410  | -1.364 | -0.676 |
| 3/12/2019 | 0.397  | 0.467  | 0.017  | 0.150  | -1.103 | -0.616 |
| 3/13/2019 | 0.643  | 0.612  | -0.426 | 0.017  | -0.089 | -0.257 |
| 3/14/2019 | 0.028  | 0.064  | 0.548  | -1.057 | -0.233 | 0.493  |
| 3/15/2019 | 0.538  | 0.637  | -0.625 | -0.001 | -0.342 | 1.062  |
| 3/18/2019 | 0.438  | 0.436  | 0.146  | -0.073 | -0.146 | 0.793  |
| 3/19/2019 | 0.015  | 0.110  | -0.103 | -0.042 | 0.380  | -0.798 |
| 3/20/2019 | -0.379 | -0.424 | -0.532 | 0.466  | 1.103  | 0.456  |
| 3/21/2019 | 1.027  | 0.753  | 1.061  | 0.096  | -0.636 | 0.819  |
| 3/22/2019 | -1.862 | -1.565 | -1.114 | -0.600 | 0.992  | -0.395 |
| 3/25/2019 | -0.168 | -0.352 | -0.097 | -0.105 | -0.499 | -1.088 |
| 3/26/2019 | 0.688  | 0.768  | 0.007  | -0.038 | 0.074  | -1.084 |
| 3/27/2019 | -0.435 | -0.427 | -0.467 | -0.525 | -0.870 | -0.618 |
| 3/28/2019 | 0.304  | 0.064  | -0.255 | 0.379  | 0.471  | -0.261 |
| 3/29/2019 | 0.689  | 0.602  | 0.063  | -0.802 | -0.602 | 1.238  |
| 4/1/2019  | 1.080  | 1.101  | 0.536  | 1.305  | -0.586 | 1.010  |
| 4/2/2019  | 0.038  | 0.052  | -0.114 | 0.918  | -1.379 | 0.415  |
| 4/3/2019  | 0.405  | 0.574  | 0.012  | 0.074  | -2.546 | 0.473  |
| 4/4/2019  | 0.199  | 0.017  | 0.145  | 0.128  | 0.049  | -0.342 |
| 4/5/2019  | 0.377  | 0.309  | 0.542  | -0.055 | -0.269 | -0.030 |
| 4/8/2019  | 0.178  | 0.200  | 0.108  | 0.072  | -1.249 | -0.339 |
| 4/9/2019  | -0.668 | -0.399 | 0.332  | -0.248 | -0.149 | -0.885 |
| 4/10/2019 | 0.378  | 0.206  | 0.299  | -0.013 | 1.044  | -0.136 |
| 4/11/2019 | -0.082 | -0.126 | -0.543 | 0.276  | 0.858  | 0.114  |
| 4/12/2019 | 0.649  | 0.416  | 0.052  | 0.328  | 0.180  | -0.095 |
| 4/15/2019 | -0.008 | 0.091  | 0.086  | -0.233 | 0.238  | -0.122 |
| 4/16/2019 | 0.073  | 0.080  | -0.680 | -0.009 | 0.364  | -0.150 |
| 4/17/2019 | -0.055 | -0.068 | 0.425  | -0.071 | 0.805  | 0.486  |
| 4/18/2019 | 0.157  | -0.017 | -0.706 | -0.053 | -0.245 | -0.417 |
| 4/22/2019 | 0.014  | 0.028  | 0.162  | 0.469  | 0.000  | 0.000  |
| 4/23/2019 | 0.813  | 0.533  | -0.272 | -0.579 | 0.000  | 0.000  |
| 4/24/2019 | -0.150 | -0.277 | -0.704 | 0.211  | -0.389 | 0.131  |
| 4/25/2019 | -0.072 | -0.062 | -0.058 | -0.112 | 0.346  | -0.050 |
| 4/26/2019 | 0.579  | 0.362  | -0.204 | 0.098  | -1.027 | -0.474 |
| 4/29/2019 | 0.122  | 0.096  | -0.307 | -0.137 | -0.959 | -0.461 |
| 4/30/2019 | -0.073 | 0.259  | 0.266  | 1.019  | -0.181 | -0.218 |
| 5/1/2019  | -0.633 | -0.378 | 0.000  | 0.000  | 0.000  | 0.000  |
| 5/2/2019  | -0.220 | -0.391 | 0.000  | 0.000  | 0.000  | 0.000  |
| 5/3/2019  | 0.979  | 0.735  | -0.083 | -0.019 | 0.310  | -0.545 |
| 5/6/2019  | -0.459 | -0.542 | 0.256  | -2.046 | -0.572 | -1.230 |
| 5/7/2019  | -1.692 | -1.351 | -0.649 | 0.921  | -0.005 | -0.113 |
| 5/8/2019  | -0.219 | -0.155 | 0.509  | -0.823 | -0.865 | -0.572 |
| 5/9/2019  | -0.434 | -0.710 | -0.386 | 0.193  | -0.365 | -0.869 |
| 5/10/2019 | 0.368  | 0.347  | 0.705  | 0.252  | -0.401 | -1.461 |
| 5/13/2019 | -2.472 | -1.811 | 0.077  | -0.586 | -2.546 | -1.167 |
| 5/14/2019 | 0.788  | 0.522  | -0.362 | 0.450  | 0.709  | -2.889 |
| 5/15/2019 | 0.537  | 0.531  | 0.063  | -0.190 | 0.557  | -0.047 |

|           |        |        |        |        |        |        |
|-----------|--------|--------|--------|--------|--------|--------|
| 5/16/2019 | 0.980  | 0.684  | -0.059 | -0.359 | -1.908 | -0.431 |
| 5/17/2019 | -0.569 | -0.463 | -0.754 | -0.213 | -0.296 | -0.296 |
| 5/20/2019 | -0.685 | -0.535 | 1.118  | -0.625 | -0.758 | -0.119 |
| 5/21/2019 | 0.787  | 0.587  | -0.818 | 0.326  | 1.142  | 1.057  |
| 5/22/2019 | -0.287 | -0.261 | 0.343  | 0.246  | -0.729 | -0.350 |
| 5/23/2019 | -1.053 | -1.070 | -0.059 | 0.119  | 0.339  | 0.010  |
| 5/24/2019 | 0.102  | 0.334  | -0.039 | -0.399 | 0.664  | 0.108  |
| 5/28/2019 | -0.904 | -0.511 | -0.433 | 0.980  | 4.144  | 3.004  |
| 5/29/2019 | -0.681 | -0.917 | -0.038 | -0.514 | -0.144 | 0.127  |
| 5/30/2019 | 0.196  | 0.125  | -0.176 | -0.659 | -1.659 | -0.705 |
| 5/31/2019 | -1.322 | -0.972 | -0.452 | -0.007 | -1.266 | -0.099 |
| 6/3/2019  | -0.272 | 0.072  | 0.135  | 0.263  | 0.220  | 0.266  |
| 6/4/2019  | 2.109  | 1.456  | -0.245 | 0.190  | 0.128  | 0.426  |
| 6/5/2019  | 0.837  | 0.858  | -0.223 | 0.000  | -0.031 | 0.000  |
| 6/6/2019  | 0.589  | 0.397  | -0.085 | 0.000  | -1.854 | 0.000  |
| 6/7/2019  | 1.029  | 1.049  | 0.118  | 0.000  | 0.197  | -0.157 |
| 6/10/2019 | 0.508  | 0.460  | -0.114 | 0.793  | -0.839 | -0.558 |
| 6/11/2019 | 0.068  | 0.246  | 0.254  | 0.422  | -0.089 | 0.087  |
| 6/12/2019 | -0.117 | -0.201 | 0.072  | -0.271 | 0.016  | 0.304  |
| 6/13/2019 | 0.426  | 0.086  | -0.514 | -0.160 | -0.315 | -0.198 |
| 6/14/2019 | -0.106 | -0.270 | -0.394 | 0.367  | 0.435  | -0.566 |
| 6/17/2019 | -0.035 | -0.080 | -0.608 | 1.264  | -0.215 | -0.306 |
| 6/18/2019 | 0.967  | 0.945  | 0.637  | 0.895  | -0.184 | 0.012  |
| 6/19/2019 | 0.291  | 0.563  | -0.332 | 0.221  | 0.654  | -0.413 |
| 6/20/2019 | 0.843  | 1.004  | 0.899  | 0.089  | 0.307  | -0.183 |
| 6/21/2019 | -0.072 | -0.163 | 0.446  | -0.252 | 0.306  | -0.381 |
| 6/24/2019 | -0.227 | 0.017  | 0.709  | -0.599 | -0.441 | 0.112  |
| 6/25/2019 | -1.023 | -0.733 | 0.820  | -0.125 | -1.141 | 0.333  |
| 6/26/2019 | -0.088 | -0.210 | -0.019 | 0.114  | 0.389  | -0.307 |
| 6/27/2019 | 0.381  | 0.328  | -0.478 | 0.118  | 0.105  | -0.497 |
| 6/28/2019 | 0.439  | 0.507  | -0.287 | -0.080 | 1.946  | 0.842  |
| 7/1/2019  | 0.877  | 0.650  | -0.099 | -0.222 | -2.909 | -0.065 |
| 7/2/2019  | 0.379  | 0.290  | -0.518 | -0.053 | -0.286 | -0.084 |
| 7/3/2019  | 0.788  | 0.611  | -0.062 | 0.532  | -0.874 | 0.694  |
| 7/5/2019  | -0.184 | -0.344 | 0.116  | -0.873 | -0.408 | -0.255 |
| 7/8/2019  | -0.519 | -0.501 | 0.243  | -0.206 | -0.318 | -0.543 |
| 7/9/2019  | 0.080  | -0.084 | -0.083 | 0.671  | -1.850 | -0.876 |
| 7/10/2019 | 0.442  | 0.413  | -0.058 | 0.216  | 1.005  | 0.619  |
| 7/11/2019 | 0.243  | 0.245  | 0.548  | -0.828 | -0.022 | 0.132  |
| 7/12/2019 | 0.442  | 0.261  | -0.088 | 0.165  | -0.863 | 0.254  |
| 7/15/2019 | 0.108  | 0.133  | 0.218  | -0.595 | -0.915 | -0.643 |
| 7/16/2019 | -0.284 | -0.233 | 0.047  | 0.690  | -0.033 | -0.055 |
| 7/17/2019 | -0.624 | -0.450 | -0.663 | 0.373  | -0.717 | 0.389  |
| 7/18/2019 | 0.443  | 0.017  | -0.380 | -0.484 | -0.492 | -0.367 |
| 7/19/2019 | -0.711 | -0.184 | 0.392  | 0.243  | 0.670  | 0.429  |
| 7/22/2019 | 0.344  | 0.156  | 0.457  | -0.190 | 0.461  | -0.353 |
| 7/23/2019 | 0.745  | 0.522  | -0.771 | 0.011  | 0.083  | -1.146 |

|           |        |        |        |        |        |        |
|-----------|--------|--------|--------|--------|--------|--------|
| 7/24/2019 | 0.460  | 0.304  | -0.167 | -0.090 | -0.968 | 0.411  |
| 7/25/2019 | -0.463 | -0.398 | -0.623 | 0.107  | -0.364 | 0.313  |
| 7/26/2019 | 0.916  | 0.409  | -0.411 | 0.080  | 0.409  | 0.073  |
| 7/29/2019 | -0.075 | -0.050 | 0.562  | -0.222 | -0.645 | 0.010  |
| 7/30/2019 | -0.304 | -0.437 | -0.447 | -0.120 | -0.773 | -0.498 |
| 7/31/2019 | -1.037 | -0.752 | 0.625  | 0.344  | -0.216 | -0.053 |
| 8/1/2019  | -0.889 | -0.639 | -0.876 | 0.164  | 0.199  | 0.819  |
| 8/2/2019  | -0.720 | -1.103 | 0.117  | 0.123  | -0.774 | 0.343  |
| 8/5/2019  | -3.033 | -2.483 | 0.026  | 0.559  | -0.832 | -0.875 |
| 8/6/2019  | 1.256  | 0.518  | 0.116  | 0.183  | -0.110 | -0.208 |
| 8/7/2019  | 0.008  | 0.209  | -0.233 | 0.463  | -0.845 | -0.321 |
| 8/8/2019  | 1.768  | 1.506  | 0.025  | 0.611  | -1.985 | 0.555  |
| 8/9/2019  | -0.626 | -0.503 | -0.425 | 0.116  | -0.667 | 0.641  |
| 8/12/2019 | -1.213 | -0.806 | 0.380  | 0.000  | 0.000  | 0.000  |
| 8/13/2019 | 1.561  | 0.783  | 0.250  | 0.000  | 0.000  | 0.000  |
| 8/14/2019 | -2.934 | -2.144 | -0.213 | 0.000  | -2.005 | 0.105  |
| 8/15/2019 | 0.116  | -0.223 | 0.011  | -0.595 | -0.526 | 0.268  |
| 8/16/2019 | 1.534  | 1.220  | 0.018  | -0.126 | 0.355  | 0.553  |
| 8/19/2019 | 1.197  | 1.073  | -0.575 | -0.364 | 0.603  | 0.284  |
| 8/20/2019 | -0.799 | -0.552 | 0.180  | 0.290  | 1.597  | -0.256 |
| 8/21/2019 | 0.853  | 0.759  | 0.145  | -0.213 | 0.798  | -0.267 |
| 8/22/2019 | -0.082 | -0.218 | -0.263 | -0.013 | 1.448  | 0.073  |
| 8/23/2019 | -2.672 | -1.725 | 0.444  | 0.375  | 0.965  | -0.254 |
| 8/26/2019 | 1.148  | 0.472  | -0.107 | 0.298  | 1.288  | -1.075 |
| 8/27/2019 | -0.331 | 0.029  | 0.014  | 0.522  | -1.497 | 0.195  |
| 8/28/2019 | 0.628  | 0.313  | -0.470 | 0.800  | -0.950 | -0.216 |
| 8/29/2019 | 1.283  | 0.957  | -0.203 | 0.988  | 0.298  | 0.061  |
| 8/30/2019 | 0.105  | 0.321  | -0.163 | -0.481 | -0.997 | -0.467 |
| 9/3/2019  | -0.605 | -0.516 | -0.019 | 0.124  | 0.136  | -3.054 |
| 9/4/2019  | 1.026  | 1.103  | 0.355  | -0.532 | -1.149 | 0.422  |
| 9/5/2019  | 1.317  | 1.136  | -0.682 | 0.655  | -0.018 | -0.242 |
| 9/6/2019  | 0.073  | 0.297  | -0.287 | -0.404 | -0.544 | -1.142 |
| 9/9/2019  | 0.131  | 0.028  | -0.019 | -0.005 | 0.251  | 0.571  |
| 9/10/2019 | 0.069  | 0.022  | -0.039 | 0.053  | 0.376  | 0.165  |
| 9/11/2019 | 0.758  | 0.659  | -0.291 | 0.042  | 0.250  | 0.100  |
| 9/12/2019 | 0.387  | 0.411  | 0.293  | 0.505  | 1.397  | 0.435  |
| 9/13/2019 | -0.089 | 0.199  | 0.388  | 0.171  | 1.118  | -0.117 |
| 9/16/2019 | -0.549 | -0.521 | -0.273 | -0.386 | 0.876  | 0.149  |
| 9/17/2019 | 0.274  | 0.266  | 0.172  | -0.764 | -0.092 | -0.068 |
| 9/18/2019 | 0.102  | 0.006  | 0.352  | 0.004  | 1.551  | 0.083  |
| 9/19/2019 | 0.042  | 0.150  | -0.123 | -0.103 | -0.869 | 0.128  |
| 9/20/2019 | -0.497 | -0.299 | -0.040 | -0.608 | -0.068 | 0.632  |
| 9/23/2019 | 0.032  | -0.128 | -0.227 | -2.876 | -0.303 | 0.051  |
| 9/24/2019 | -0.827 | -0.479 | -0.275 | -2.028 | -1.343 | 0.417  |
| 9/25/2019 | 0.659  | 0.067  | -0.092 | 1.120  | -0.134 | 0.218  |
| 9/26/2019 | -0.228 | 0.000  | -0.309 | 1.126  | 0.447  | -0.822 |
| 9/27/2019 | -0.411 | -0.341 | -0.212 | 0.284  | -0.377 | -0.377 |

|            |        |        |        |        |        |        |
|------------|--------|--------|--------|--------|--------|--------|
| 9/30/2019  | 0.506  | 0.190  | 0.575  | 1.059  | 1.396  | 0.648  |
| 10/1/2019  | -1.202 | -0.972 | 0.160  | 0.676  | -0.327 | 0.239  |
| 10/2/2019  | -1.841 | -1.817 | 0.015  | -0.356 | -3.378 | 0.170  |
| 10/3/2019  | 0.712  | 0.430  | -0.069 | -0.426 | 0.166  | 0.732  |
| 10/4/2019  | 1.455  | 1.082  | 0.273  | -0.216 | -0.804 | -0.057 |
| 10/7/2019  | -0.400 | -0.091 | 0.269  | 0.684  | -0.276 | -1.078 |
| 10/8/2019  | -1.579 | -1.192 | -0.350 | -0.581 | -0.330 | -0.149 |
| 10/9/2019  | 0.895  | 0.646  | 0.173  | -0.439 | -0.006 | 0.314  |
| 10/10/2019 | 0.632  | 0.619  | 0.918  | 0.283  | -0.422 | 0.000  |
| 10/11/2019 | 1.097  | 1.328  | 0.086  | 0.275  | 0.308  | 0.000  |
| 10/14/2019 | -0.137 | -0.134 | 0.007  | -0.246 | -0.290 | -0.461 |
| 10/15/2019 | 1.072  | 0.941  | -0.432 | -0.234 | -0.127 | -0.173 |
| 10/16/2019 | -0.196 | -0.017 | -0.336 | 0.588  | 0.447  | -0.030 |
| 10/17/2019 | 0.322  | 0.277  | 0.149  | 0.460  | -0.574 | 1.816  |
| 10/18/2019 | -0.232 | -0.155 | -0.001 | 0.187  | -0.358 | 0.555  |
| 10/21/2019 | 0.692  | 0.635  | 0.092  | -0.139 | -0.280 | 0.000  |
| 10/22/2019 | -0.236 | -0.094 | 0.052  | 0.362  | -0.061 | 0.000  |
| 10/23/2019 | 0.259  | 0.132  | -0.070 | -0.218 | -0.551 | 0.272  |
| 10/24/2019 | 0.058  | 0.236  | 0.061  | 0.453  | -0.012 | 0.656  |
| 10/25/2019 | 0.459  | 0.296  | 0.464  | -0.175 | 0.098  | 0.253  |
| 10/28/2019 | 0.680  | 0.459  | -0.025 | -0.072 | -0.098 | 0.755  |
| 10/29/2019 | -0.200 | -0.005 | -0.240 | 0.572  | -0.461 | 0.369  |
| 10/30/2019 | 0.409  | 0.158  | -0.291 | 0.079  | -0.259 | 3.392  |
| 10/31/2019 | -0.276 | -0.136 | -0.121 | 0.072  | -0.403 | 3.710  |
| 11/1/2019  | 0.918  | 0.797  | 0.110  | 0.471  | 0.840  | 3.878  |
| 11/4/2019  | 0.333  | 0.485  | 0.482  | 0.018  | 0.815  | -1.395 |
| 11/5/2019  | -0.150 | -0.081 | -0.022 | 0.361  | 0.226  | -0.771 |
| 11/6/2019  | 0.196  | 0.118  | 0.148  | -0.299 | -0.335 | 2.492  |
| 11/7/2019  | 0.315  | 0.284  | -0.286 | 0.427  | 0.086  | -0.143 |
| 11/8/2019  | 0.346  | 0.043  | 0.289  | -0.022 | 1.797  | -2.257 |
| 11/11/2019 | -0.254 | -0.188 | -0.889 | -0.033 | 0.102  | -0.982 |
| 11/12/2019 | 0.105  | 0.150  | -0.314 | -0.514 | 0.496  | -1.043 |
| 11/13/2019 | 0.118  | -0.059 | 0.286  | -0.078 | 0.286  | 0.165  |
| 11/14/2019 | 0.039  | -0.193 | 0.431  | -0.235 | 4.019  | 0.886  |
| 11/15/2019 | 0.780  | 0.771  | 0.328  | 0.444  | -0.831 | -1.140 |
| 11/18/2019 | 0.147  | 0.154  | -0.211 | -0.272 | -0.774 | -0.032 |
| 11/19/2019 | -0.141 | -0.064 | -0.341 | 0.010  | 0.214  | 0.208  |
| 11/20/2019 | -0.468 | -0.502 | -0.057 | -0.542 | 1.065  | 0.210  |
| 11/21/2019 | -0.196 | -0.230 | 0.090  | 0.202  | 0.383  | -0.275 |
| 11/22/2019 | 0.307  | 0.155  | -0.036 | 0.101  | 0.051  | -0.100 |
| 11/25/2019 | 0.768  | 0.721  | -0.190 | -0.652 | -0.452 | -0.084 |
| 11/26/2019 | 0.278  | 0.159  | -0.113 | -0.468 | -0.938 | -0.842 |
| 11/27/2019 | 0.418  | 0.313  | -0.033 | 0.121  | -0.592 | 0.605  |
| 11/29/2019 | -0.407 | -0.483 | 0.054  | 0.249  | 0.921  | 1.661  |
| 12/2/2019  | -0.835 | -0.619 | 0.349  | -0.818 | 0.063  | -0.008 |
| 12/3/2019  | -0.704 | -0.574 | -0.219 | -0.281 | 0.328  | 0.872  |
| 12/4/2019  | 0.703  | 0.526  | 0.025  | 0.359  | -0.720 | 0.467  |

|            |        |        |        |        |        |        |
|------------|--------|--------|--------|--------|--------|--------|
| 12/5/2019  | 0.177  | 0.182  | -0.422 | -0.203 | 0.214  | 0.536  |
| 12/6/2019  | 0.893  | 0.788  | 0.802  | 0.119  | -0.799 | 0.637  |
| 12/9/2019  | -0.279 | -0.117 | 0.037  | -0.582 | -0.759 | -0.308 |
| 12/10/2019 | -0.080 | -0.106 | -0.457 | 0.515  | -0.682 | -0.011 |
| 12/11/2019 | 0.246  | 0.239  | 0.134  | 0.088  | -0.053 | 0.029  |
| 12/12/2019 | 0.957  | 0.776  | 0.306  | 0.169  | 0.975  | 0.000  |
| 12/13/2019 | 0.114  | 0.598  | 0.283  | 0.359  | 0.251  | 0.000  |
| 12/16/2019 | 0.722  | 0.704  | 0.733  | 0.302  | 0.883  | -0.467 |
| 12/17/2019 | 0.056  | 0.021  | -0.176 | 0.856  | -0.498 | 0.620  |
| 12/18/2019 | -0.099 | -0.156 | 0.427  | 0.465  | -0.448 | 1.024  |
| 12/19/2019 | 0.425  | 0.218  | 0.483  | 0.417  | 0.472  | 1.440  |
| 12/20/2019 | 0.459  | 0.352  | 0.120  | 0.305  | 0.070  | 0.579  |
| 12/23/2019 | 0.051  | 0.026  | 0.295  | 0.451  | -0.869 | 0.436  |
| 12/24/2019 | 0.005  | 0.031  | 0.063  | -0.039 | -0.293 | 0.155  |
| 12/26/2019 | 0.618  | 0.433  | -0.058 | -0.012 | 0.000  | 0.000  |
| 12/27/2019 | 0.029  | 0.262  | 0.646  | 0.168  | 2.184  | 0.000  |
| 12/30/2019 | -0.557 | -0.478 | 0.128  | 0.300  | 0.121  | 0.049  |
| 12/31/2019 | 0.295  | 0.175  | 0.324  | 0.522  | 0.715  | 0.918  |
| 1/2/2020   | 0.807  | 0.764  | -0.072 | -0.733 | -0.331 | 0.346  |
| 1/3/2020   | -0.884 | -0.605 | -0.359 | 0.051  | 1.616  | 0.866  |
| 1/6/2020   | 0.308  | 0.005  | -0.138 | -1.884 | 2.032  | -0.551 |
| 1/7/2020   | -0.317 | -0.123 | -0.108 | -0.291 | 0.944  | -0.607 |
| 1/8/2020   | 0.594  | 0.195  | 1.031  | 1.301  | 2.789  | 0.167  |
| 1/9/2020   | 0.644  | 0.579  | 0.612  | 1.409  | 1.355  | 2.087  |
| 1/10/2020  | -0.221 | -0.082 | 0.436  | -0.380 | -0.979 | 0.447  |
| 1/13/2020  | 0.680  | 0.428  | 0.654  | -0.113 | 0.238  | -0.489 |
| 1/14/2020  | -0.139 | -0.020 | 0.314  | 0.495  | -0.603 | -0.691 |
| 1/15/2020  | 0.143  | 0.092  | -1.030 | 0.266  | -0.064 | -1.945 |
| 1/16/2020  | 0.897  | 0.593  | -1.008 | 0.454  | 2.238  | 0.549  |
| 1/17/2020  | 0.471  | 0.464  | -0.192 | 0.087  | 0.848  | -0.478 |
| 1/21/2020  | -0.206 | -0.312 | 1.046  | -0.044 | -1.275 | -0.078 |
| 1/22/2020  | 0.087  | 0.116  | 0.537  | 0.730  | -0.183 | -0.366 |
| 1/23/2020  | 0.045  | -0.232 | 0.022  | -0.474 | 0.962  | 0.138  |
| 1/24/2020  | -0.948 | -0.456 | -0.520 | 0.114  | -0.947 | -0.084 |
| 1/27/2020  | -1.596 | -1.601 | -0.373 | -0.352 | -1.357 | -0.806 |
| 1/28/2020  | 1.027  | 0.663  | -0.187 | -0.175 | -1.839 | -0.910 |
| 1/29/2020  | -0.020 | -0.010 | -0.028 | 0.120  | -0.076 | -0.215 |
| 1/30/2020  | 0.440  | -0.056 | -0.557 | 0.309  | 0.049  | 0.539  |
| 1/31/2020  | -1.599 | -1.238 | -0.438 | 0.434  | -1.682 | 0.456  |
| 2/3/2020   | 0.821  | 0.368  | 0.011  | -1.084 | -2.935 | 0.297  |
| 2/4/2020   | 1.562  | 1.351  | 0.536  | 0.181  | -0.379 | 0.423  |
| 2/5/2020   | 1.134  | 0.945  | 0.157  | 0.236  | -0.199 | 1.541  |
| 2/6/2020   | 0.360  | 0.570  | -0.206 | -0.162 | 1.383  | 1.891  |
| 2/7/2020   | -0.551 | -0.484 | -0.435 | -0.103 | -0.720 | -1.086 |
| 2/10/2020  | 0.852  | 0.353  | -0.003 | -0.301 | -0.794 | -0.458 |
| 2/11/2020  | 0.120  | 0.301  | 0.195  | -0.524 | -0.491 | 0.000  |
| 2/12/2020  | 0.663  | 0.570  | 0.083  | -0.691 | 0.314  | 0.000  |

|           |         |         |        |         |        |        |
|-----------|---------|---------|--------|---------|--------|--------|
| 2/13/2020 | -0.264  | -0.260  | -0.075 | 0.887   | 0.131  | -1.543 |
| 2/14/2020 | 0.173   | 0.085   | 0.518  | 0.459   | -0.674 | -0.915 |
| 2/18/2020 | -0.375  | -0.481  | -0.382 | -0.622  | -1.758 | -1.198 |
| 2/19/2020 | 0.489   | 0.441   | 0.039  | 0.167   | -0.433 | -0.788 |
| 2/20/2020 | -0.357  | -0.511  | -1.538 | 0.231   | -0.311 | -0.468 |
| 2/21/2020 | -1.152  | -0.817  | 0.165  | 1.084   | -0.129 | -0.337 |
| 2/24/2020 | -3.474  | -3.108  | 0.198  | -1.133  | -2.558 | -0.017 |
| 2/25/2020 | -2.945  | -2.503  | -0.539 | -0.287  | -0.393 | -1.104 |
| 2/26/2020 | -0.331  | -0.462  | -0.791 | -0.566  | 0.200  | -2.038 |
| 2/27/2020 | -4.737  | -3.685  | -0.641 | -0.391  | -1.420 | -1.039 |
| 2/28/2020 | -0.825  | -1.616  | -0.247 | -0.577  | -4.282 | -3.024 |
| 3/2/2020  | 4.687   | 3.388   | -0.417 | -2.102  | -1.309 | 1.464  |
| 3/3/2020  | -2.885  | -1.476  | 0.273  | -0.551  | 4.194  | 1.312  |
| 3/4/2020  | 4.176   | 2.860   | -0.012 | -1.487  | 0.373  | 0.856  |
| 3/5/2020  | -3.421  | -2.150  | -0.980 | 0.468   | 1.067  | 1.537  |
| 3/6/2020  | -1.665  | -1.971  | -1.919 | -1.393  | -2.340 | -0.383 |
| 3/9/2020  | -7.676  | -7.280  | -6.222 | -8.281  | -6.868 | -5.767 |
| 3/10/2020 | 4.903   | 2.799   | 1.508  | 3.873   | -6.654 | 0.892  |
| 3/11/2020 | -4.934  | -3.719  | 0.301  | -0.517  | -0.895 | 0.663  |
| 3/12/2020 | -9.939  | -10.220 | -0.903 | -4.584  | -7.851 | -5.090 |
| 3/13/2020 | 9.240   | 5.840   | -4.918 | -0.387  | 2.258  | -6.539 |
| 3/16/2020 | -12.548 | -9.683  | -3.565 | -12.251 | -1.531 | -2.925 |
| 3/17/2020 | 6.145   | 3.992   | -2.603 | -3.276  | 3.370  | 0.603  |
| 3/18/2020 | -4.831  | -5.061  | -1.885 | -4.449  | 1.317  | -0.597 |
| 3/19/2020 | 0.163   | 0.554   | -7.945 | 3.756   | -5.697 | -2.441 |
| 3/20/2020 | -4.633  | -2.365  | -0.432 | 1.829   | 0.330  | -0.495 |
| 3/23/2020 | -2.866  | -3.056  | -0.810 | 5.451   | -7.607 | -5.202 |
| 3/24/2020 | 8.693   | 8.207   | 0.272  | -0.057  | -1.492 | -4.293 |
| 3/25/2020 | 0.704   | 2.315   | 0.149  | -1.466  | 1.813  | 0.285  |
| 3/26/2020 | 6.022   | 4.725   | 0.124  | -0.138  | 2.343  | 1.384  |
| 3/27/2020 | -3.233  | -2.509  | -0.056 | -0.714  | 0.919  | 1.936  |
| 3/30/2020 | 3.542   | 2.323   | -0.863 | -2.469  | -3.523 | 1.386  |
| 3/31/2020 | -1.755  | -0.950  | 0.019  | -0.523  | 1.469  | 1.538  |
| 4/1/2020  | -4.554  | -3.852  | -0.503 | -1.239  | -1.884 | 0.553  |
| 4/2/2020  | 2.285   | 1.380   | -0.494 | -1.030  | -1.739 | 1.142  |
| 4/3/2020  | -1.632  | -1.394  | -1.158 | -1.293  | 1.365  | 1.277  |
| 4/6/2020  | 6.864   | 5.578   | -5.931 | -1.144  | 1.355  | -1.785 |
| 4/7/2020  | -0.182  | 0.662   | 4.721  | 0.867   | 0.654  | -2.711 |
| 4/8/2020  | 3.278   | 2.089   | 7.227  | 2.047   | 1.526  | -0.648 |
| 4/9/2020  | 1.533   | 1.443   | 3.663  | 1.794   | 2.310  | 0.056  |
| 4/13/2020 | -0.872  | -0.608  | 0.101  | 0.346   | 0.000  | 0.000  |
| 4/14/2020 | 3.193   | 2.517   | -0.572 | 0.447   | 0.000  | 0.000  |
| 4/15/2020 | -2.160  | -2.290  | -0.600 | -1.497  | 4.477  | 1.112  |
| 4/16/2020 | 0.826   | 0.313   | -1.320 | -1.308  | -3.372 | -1.100 |
| 4/17/2020 | 2.237   | 2.540   | -1.240 | -0.088  | 2.386  | 0.206  |
| 4/20/2020 | -1.748  | -1.238  | -0.732 | 0.987   | -2.140 | 1.376  |
| 4/21/2020 | -3.117  | -3.107  | -1.674 | -1.990  | -4.808 | 0.863  |

|           |        |        |        |        |        |        |
|-----------|--------|--------|--------|--------|--------|--------|
| 4/22/2020 | 2.116  | 1.731  | -1.448 | -0.201 | 2.173  | -0.668 |
| 4/23/2020 | -0.115 | 0.171  | 0.024  | 1.469  | 0.980  | -0.093 |
| 4/24/2020 | 1.362  | 0.573  | -0.880 | 0.213  | 0.785  | -0.604 |
| 4/27/2020 | 1.425  | 1.695  | -0.926 | 1.354  | 1.238  | -0.092 |
| 4/28/2020 | -0.604 | 0.048  | -0.456 | 0.878  | 1.011  | 0.117  |
| 4/29/2020 | 2.529  | 2.281  | 0.101  | 1.400  | 0.536  | 2.941  |
| 4/30/2020 | -0.866 | -0.827 | -0.552 | 1.095  | 0.188  | 0.625  |
| 5/1/2020  | -2.863 | -2.295 | 0.000  | 0.000  | 0.000  | 0.000  |
| 5/4/2020  | 0.367  | -0.429 | 0.000  | 0.000  | 0.000  | 0.000  |
| 5/5/2020  | 0.931  | 1.012  | 0.978  | 0.995  | 2.123  | 2.131  |
| 5/6/2020  | -0.630 | -0.481 | 1.124  | 0.504  | 2.890  | 2.613  |
| 5/7/2020  | 0.980  | 0.720  | 0.112  | 0.219  | -1.563 | -3.893 |
| 5/8/2020  | 1.689  | 1.649  | 0.165  | -0.609 | 0.234  | -1.559 |
| 5/11/2020 | 0.137  | 0.088  | 1.326  | 0.358  | -0.999 | -0.446 |
| 5/12/2020 | -1.981 | -1.313 | 1.738  | 0.180  | 0.346  | -1.285 |
| 5/13/2020 | -1.688 | -1.657 | -0.879 | -1.340 | -0.376 | -1.996 |
| 5/14/2020 | 1.251  | 0.121  | -0.223 | 0.078  | 0.706  | -3.199 |
| 5/15/2020 | 0.405  | 0.350  | -1.544 | 0.509  | 1.217  | 0.177  |
| 5/18/2020 | 2.909  | 2.734  | -0.077 | 0.837  | 0.036  | 3.004  |
| 5/19/2020 | -1.091 | -0.341 | -0.060 | 0.249  | 1.801  | 1.560  |
| 5/20/2020 | 1.511  | 1.466  | 0.980  | -0.349 | 1.602  | -0.769 |
| 5/21/2020 | -0.815 | -0.844 | 0.530  | -0.425 | 1.107  | -1.377 |
| 5/22/2020 | 0.188  | -0.234 | 0.225  | 0.193  | -0.583 | 1.034  |
| 5/26/2020 | 1.156  | 1.881  | 1.408  | 1.186  | 0.063  | -1.666 |
| 5/27/2020 | 1.470  | 0.996  | -0.728 | 0.486  | 4.110  | -0.002 |
| 5/28/2020 | -0.192 | 0.460  | -0.715 | -0.431 | -2.591 | -0.359 |
| 5/29/2020 | 0.426  | -0.045 | 0.554  | 0.407  | -0.240 | 0.068  |
| 6/1/2020  | 0.295  | 0.802  | 0.006  | 0.780  | 0.432  | 0.000  |
| 6/2/2020  | 0.836  | 1.041  | 1.253  | 1.108  | 0.919  | 0.000  |
| 6/3/2020  | 1.265  | 1.601  | 0.022  | 0.740  | -0.625 | 0.502  |
| 6/4/2020  | -0.270 | -0.104 | 1.237  | 1.233  | -1.049 | 0.534  |
| 6/5/2020  | 2.411  | 2.207  | 0.315  | -0.400 | -0.283 | -0.756 |
| 6/8/2020  | 1.167  | 0.897  | 0.820  | 2.406  | 0.524  | 1.185  |
| 6/9/2020  | -0.621 | -0.309 | 1.430  | -0.254 | 0.158  | -0.529 |
| 6/10/2020 | -0.245 | -0.283 | -0.018 | -1.045 | -0.482 | 0.377  |
| 6/11/2020 | -5.962 | -5.006 | -1.177 | -0.393 | -0.352 | 1.145  |
| 6/12/2020 | 1.237  | 0.404  | -0.358 | -0.839 | -0.159 | 0.034  |
| 6/15/2020 | 0.725  | 0.067  | -2.420 | -0.090 | -1.748 | 0.247  |
| 6/16/2020 | 1.909  | 2.219  | 0.144  | 1.447  | -0.233 | 1.160  |
| 6/17/2020 | -0.286 | -0.044 | -0.456 | 1.852  | -0.724 | 0.346  |
| 6/18/2020 | -0.031 | -0.159 | -0.053 | -0.573 | 0.164  | 0.186  |
| 6/19/2020 | -0.474 | -0.209 | -0.755 | -0.071 | 0.447  | -0.153 |
| 6/22/2020 | 0.651  | 0.417  | -0.335 | -0.084 | 0.134  | -1.131 |
| 6/23/2020 | 0.582  | 0.959  | 0.636  | 0.096  | -0.759 | -1.091 |
| 6/24/2020 | -2.504 | -2.370 | -0.096 | 0.286  | -0.572 | -1.079 |
| 6/25/2020 | 1.150  | 0.609  | 0.365  | -1.239 | -0.705 | -0.446 |
| 6/26/2020 | -2.648 | -1.731 | -0.729 | -0.801 | 0.187  | -0.062 |

|           |        |        |        |        |        |        |
|-----------|--------|--------|--------|--------|--------|--------|
| 6/29/2020 | 1.461  | 0.866  | 0.600  | -0.627 | 0.223  | 0.494  |
| 6/30/2020 | 1.627  | 1.173  | -0.323 | 0.475  | -0.512 | -1.057 |
| 7/1/2020  | 0.552  | 0.450  | -0.031 | 0.288  | -1.155 | -0.186 |
| 7/2/2020  | 0.464  | 0.807  | 1.108  | -0.118 | -1.687 | -0.992 |
| 7/6/2020  | 1.725  | 1.723  | -0.044 | 1.578  | 0.740  | -0.051 |
| 7/7/2020  | -1.149 | -1.036 | -1.306 | -0.218 | -0.281 | -1.856 |
| 7/8/2020  | 0.919  | 0.543  | 1.496  | 0.473  | 1.999  | -0.646 |
| 7/9/2020  | -0.430 | -0.425 | -0.294 | -0.365 | -0.116 | -1.489 |
| 7/10/2020 | 1.002  | 0.703  | 0.444  | -0.236 | -0.305 | -0.069 |
| 7/13/2020 | -0.897 | -0.198 | -0.486 | 0.457  | -0.277 | 0.494  |
| 7/14/2020 | 1.191  | 0.663  | -0.214 | -0.402 | -1.984 | -0.474 |
| 7/15/2020 | 0.714  | 1.065  | -0.533 | -0.240 | -0.194 | 0.495  |
| 7/16/2020 | -0.355 | -0.523 | -3.406 | -0.461 | 0.884  | -0.249 |
| 7/17/2020 | 0.264  | 0.233  | 0.804  | -0.045 | -0.579 | 0.266  |
| 7/20/2020 | 1.015  | 0.868  | -0.336 | -0.181 | -0.462 | -0.351 |
| 7/21/2020 | -0.018 | 0.465  | -0.782 | 0.906  | 0.589  | -1.190 |
| 7/22/2020 | 0.563  | 0.177  | 0.971  | -0.188 | 0.578  | -0.950 |
| 7/23/2020 | -1.474 | -0.894 | -0.047 | 0.018  | -0.481 | 1.044  |
| 7/24/2020 | -0.620 | -0.727 | -0.611 | 0.183  | 0.111  | 1.905  |
| 7/27/2020 | 0.753  | 0.921  | 1.157  | 0.813  | 1.655  | 1.503  |
| 7/28/2020 | -0.660 | -0.373 | -0.274 | 0.028  | 0.240  | -1.376 |
| 7/29/2020 | 1.248  | 0.776  | -0.714 | 0.250  | 0.044  | 0.023  |
| 7/30/2020 | -0.307 | -0.707 | -0.428 | 0.005  | 0.094  | -1.181 |
| 7/31/2020 | 1.008  | 0.152  | 0.386  | 0.000  | 0.000  | 0.000  |
| 8/3/2020  | 0.761  | 0.800  | -0.462 | 0.000  | 0.000  | 0.000  |
| 8/4/2020  | 0.279  | 0.545  | -0.265 | 0.349  | 1.656  | -1.194 |
| 8/5/2020  | 0.691  | 0.825  | -0.529 | 1.027  | 0.758  | -0.940 |
| 8/6/2020  | 0.817  | 0.354  | -0.555 | 0.868  | -0.614 | 0.906  |
| 8/7/2020  | 0.003  | -0.251 | -0.221 | -0.057 | 1.302  | 1.111  |
| 8/10/2020 | 0.259  | 0.185  | -0.991 | 0.681  | -0.184 | -0.437 |
| 8/11/2020 | -0.829 | -0.056 | -0.390 | -0.192 | 1.120  | -1.354 |
| 8/12/2020 | 1.538  | 1.384  | -0.073 | 0.409  | -0.203 | 0.564  |
| 8/13/2020 | -0.218 | -0.162 | -0.653 | 0.630  | 0.804  | -1.453 |
| 8/14/2020 | -0.010 | -0.269 | 0.805  | -0.120 | -0.797 | 0.061  |
| 8/17/2020 | 0.279  | 0.324  | 0.024  | 0.903  | 0.532  | 1.834  |
| 8/18/2020 | 0.360  | 0.273  | -0.016 | -0.097 | -0.210 | -0.423 |
| 8/19/2020 | -0.397 | -0.177 | 0.041  | 0.089  | 0.238  | 0.685  |
| 8/20/2020 | 0.476  | -0.218 | -0.268 | 0.000  | 0.286  | 1.636  |
| 8/21/2020 | 0.450  | 0.228  | 0.235  | 0.000  | -0.558 | 0.100  |
| 8/24/2020 | 1.008  | 1.096  | 0.746  | 0.968  | 0.482  | 0.858  |
| 8/25/2020 | 0.434  | 0.275  | 0.499  | 0.150  | -0.447 | 1.046  |
| 8/26/2020 | 1.177  | 0.977  | 0.154  | -0.235 | 0.516  | 0.984  |
| 8/27/2020 | 0.145  | -0.178 | 0.335  | -0.493 | -0.398 | 2.139  |
| 8/28/2020 | 0.645  | 0.513  | 0.929  | -0.056 | 0.377  | 1.032  |
| 8/31/2020 | -0.171 | -0.222 | -0.411 | 0.320  | 0.977  | 0.830  |
| 9/1/2020  | 0.752  | 0.467  | 1.067  | 0.575  | 0.186  | 0.716  |
| 9/2/2020  | 1.505  | 1.089  | -0.483 | -0.547 | -0.089 | 0.695  |

|            |        |        |        |        |        |        |
|------------|--------|--------|--------|--------|--------|--------|
| 9/3/2020   | -3.776 | -2.702 | -0.613 | -0.055 | -0.062 | -0.105 |
| 9/4/2020   | -0.778 | -1.053 | -0.770 | -0.587 | 0.783  | -1.751 |
| 9/8/2020   | -3.036 | -1.847 | -0.611 | -0.531 | -1.315 | -1.973 |
| 9/9/2020   | 2.080  | 1.615  | -0.068 | 0.187  | -0.905 | 0.606  |
| 9/10/2020  | -1.864 | -1.123 | -0.698 | 0.884  | 1.499  | 2.071  |
| 9/11/2020  | 0.000  | 0.015  | 0.350  | -0.225 | 0.714  | 0.477  |
| 9/14/2020  | 1.261  | 1.077  | 0.071  | -0.479 | -0.130 | -0.195 |
| 9/15/2020  | 0.499  | 0.424  | 0.559  | -0.619 | 0.000  | 0.085  |
| 9/16/2020  | -0.663 | -0.267 | 0.099  | -0.016 | -0.929 | 0.045  |
| 9/17/2020  | -0.948 | -0.902 | 0.350  | -0.532 | -0.249 | -1.014 |
| 9/18/2020  | -1.179 | -0.777 | 0.027  | 0.180  | 0.436  | 0.525  |
| 9/21/2020  | -1.072 | -1.598 | -0.982 | -0.343 | -0.276 | -0.465 |
| 9/22/2020  | 1.099  | 0.613  | 0.319  | 0.073  | 0.228  | -0.001 |
| 9/23/2020  | -2.411 | -1.604 | -1.886 | -0.128 | 0.838  | -0.086 |
| 9/24/2020  | 0.376  | -0.206 | -0.307 | -0.948 | 0.974  | 0.020  |
| 9/25/2020  | 1.641  | 1.071  | -0.122 | -0.258 | 1.593  | 0.705  |
| 9/28/2020  | 1.582  | 1.611  | -0.242 | 0.358  | 0.459  | 0.422  |
| 9/29/2020  | -0.477 | -0.319 | 0.102  | 0.458  | 0.331  | -0.164 |
| 9/30/2020  | 0.913  | 0.391  | 0.497  | -0.105 | 1.517  | -0.076 |
| 10/1/2020  | 0.562  | 0.441  | -0.725 | 0.055  | -0.170 | -0.298 |
| 10/2/2020  | -1.083 | -0.790 | -0.895 | 0.298  | 0.755  | -0.397 |
| 10/5/2020  | 1.828  | 1.737  | -0.568 | 0.265  | 3.006  | -0.082 |
| 10/6/2020  | -1.494 | -0.905 | 0.904  | 1.029  | 4.854  | -0.522 |
| 10/7/2020  | 1.745  | 1.108  | -0.562 | 0.729  | -2.052 | 0.671  |
| 10/8/2020  | 0.739  | 0.715  | -0.002 | -0.227 | 0.804  | -1.157 |
| 10/9/2020  | 0.919  | 0.829  | 0.512  | 0.495  | -0.237 | 0.601  |
| 10/12/2020 | 1.905  | 1.438  | -0.067 | 0.210  | 0.024  | 0.322  |
| 10/13/2020 | -0.685 | -0.580 | -0.069 | -0.448 | -0.898 | -0.424 |
| 10/14/2020 | -0.725 | -0.450 | -0.042 | 1.213  | 0.135  | -0.125 |
| 10/15/2020 | -0.156 | -0.851 | -0.828 | -0.347 | -0.380 | -0.190 |
| 10/16/2020 | 0.004  | 0.200  | -0.037 | -0.209 | 2.117  | 0.094  |
| 10/19/2020 | -1.716 | -0.922 | 0.145  | -0.527 | -0.048 | -0.375 |
| 10/20/2020 | 0.553  | 0.332  | 0.350  | 0.198  | -0.072 | 0.000  |
| 10/21/2020 | -0.191 | -0.156 | 0.203  | 0.030  | -1.506 | 0.000  |
| 10/22/2020 | 0.463  | 0.131  | 0.176  | -0.218 | -0.018 | 0.532  |
| 10/23/2020 | 0.337  | 0.331  | -0.261 | 0.439  | 1.283  | -0.107 |
| 10/26/2020 | -1.833 | -1.583 | 0.562  | -2.064 | 0.422  | -0.850 |
| 10/27/2020 | -0.154 | -0.249 | -0.424 | 0.209  | 0.958  | 0.005  |
| 10/28/2020 | -3.743 | -3.283 | 0.069  | -0.254 | -0.006 | -0.078 |
| 10/29/2020 | 1.268  | 0.520  | -0.397 | 0.000  | -0.060 | -0.269 |
| 10/30/2020 | -1.283 | -1.132 | -0.609 | 0.000  | 3.279  | -0.074 |
| 11/2/2020  | 1.048  | 1.263  | -0.035 | -0.912 | 1.085  | 0.138  |
| 11/3/2020  | 1.837  | 2.014  | 0.867  | 0.783  | -1.090 | -0.324 |
| 11/4/2020  | 2.407  | 2.060  | -0.282 | -0.032 | 0.115  | -0.259 |
| 11/5/2020  | 2.075  | 2.112  | 0.432  | 0.766  | 0.397  | 0.904  |
| 11/6/2020  | -0.111 | 0.074  | -0.249 | 0.229  | 2.981  | 0.476  |
| 11/9/2020  | 0.968  | 1.303  | 0.663  | 1.752  | 3.639  | -0.818 |

|            |        |        |        |        |        |        |
|------------|--------|--------|--------|--------|--------|--------|
| 11/10/2020 | -0.373 | 0.141  | 0.938  | 0.948  | 0.258  | 1.070  |
| 11/11/2020 | 0.828  | 0.786  | 0.281  | -0.638 | 2.629  | 2.427  |
| 11/12/2020 | -0.935 | -0.704 | 0.939  | 0.251  | 5.133  | -0.637 |
| 11/13/2020 | 1.267  | 0.834  | -0.514 | 0.411  | -3.277 | 0.456  |
| 11/16/2020 | 1.014  | 1.202  | 0.815  | 0.213  | -2.674 | 0.238  |
| 11/17/2020 | -0.540 | -0.218 | 1.566  | 0.415  | 0.163  | -0.016 |
| 11/18/2020 | -1.139 | -0.639 | 1.824  | -0.216 | 1.497  | -0.668 |
| 11/19/2020 | 0.335  | -0.033 | -0.627 | -0.258 | -1.229 | -1.285 |
| 11/20/2020 | -0.713 | -0.307 | -0.147 | 0.964  | -1.484 | 0.468  |
| 11/23/2020 | 0.379  | 0.211  | 0.714  | -0.247 | -3.436 | 0.158  |
| 11/24/2020 | 1.657  | 1.544  | 0.203  | 1.078  | 0.964  | -0.492 |
| 11/25/2020 | -0.145 | -0.005 | 0.354  | 0.813  | 1.933  | 0.574  |
| 11/27/2020 | 0.278  | 0.452  | 0.342  | -1.378 | -0.021 | -1.121 |
| 11/30/2020 | -0.441 | -0.796 | 0.710  | 0.381  | -1.325 | 0.980  |
| 12/1/2020  | 1.208  | 1.171  | 0.230  | 0.437  | 1.421  | -0.433 |
| 12/2/2020  | 0.239  | 0.308  | 0.114  | 0.168  | -0.402 | 0.781  |
| 12/3/2020  | -0.151 | 0.149  | 0.207  | 0.333  | -0.884 | 0.062  |
| 12/4/2020  | 0.706  | 0.714  | -0.071 | 0.024  | 0.782  | 0.508  |
| 12/7/2020  | -0.212 | -0.194 | 0.048  | 0.047  | -0.549 | -1.076 |
| 12/8/2020  | 0.277  | 0.134  | 0.679  | 0.132  | -0.297 | -0.453 |
| 12/9/2020  | -0.771 | -0.417 | 0.111  | 0.174  | 0.032  | 0.057  |
| 12/10/2020 | -0.259 | -0.163 | -0.255 | 0.136  | -3.510 | -0.395 |
| 12/11/2020 | -0.112 | -0.335 | -0.282 | 1.302  | 0.726  | 0.582  |
| 12/14/2020 | -0.467 | -0.196 | 0.045  | 0.069  | 0.633  | 0.147  |
| 12/15/2020 | 1.413  | 0.889  | 0.072  | 0.318  | 1.499  | -0.342 |
| 12/16/2020 | 0.204  | 0.467  | 1.275  | 0.468  | 1.514  | -0.575 |
| 12/17/2020 | 0.473  | 0.552  | -0.529 | 0.325  | 1.116  | -0.186 |
| 12/18/2020 | -0.512 | -0.506 | 0.701  | -0.342 | -0.282 | 1.246  |
| 12/21/2020 | -0.087 | -0.675 | 0.259  | -2.785 | -0.272 | 0.011  |
| 12/22/2020 | -0.172 | -0.172 | 0.457  | 0.777  | 1.004  | 2.409  |
| 12/23/2020 | 0.080  | 0.334  | 0.154  | 0.315  | -0.201 | 0.976  |
| 12/24/2020 | 0.312  | 0.347  | -0.154 | -0.170 | 0.980  | 0.339  |
| 12/28/2020 | 1.093  | 0.892  | -0.163 | -0.674 | 0.215  | 0.152  |
| 12/29/2020 | -0.213 | 0.251  | 0.231  | 0.074  | -0.241 | 0.073  |
| 12/30/2020 | -0.066 | 0.114  | 0.384  | 0.505  | -0.357 | 0.457  |
| 12/31/2020 | 0.572  | 0.146  | -0.235 | 0.387  | -0.264 | 0.678  |
| 1/4/2021   | -1.561 | -0.653 | 0.336  | 0.354  | 2.995  | -0.113 |
| 1/5/2021   | 0.709  | 0.508  | -0.519 | -0.264 | -3.106 | 0.154  |
| 1/6/2021   | 0.416  | 0.505  | 0.054  | 0.142  | 0.285  | 0.557  |
| 1/7/2021   | 1.403  | 1.168  | -0.169 | 0.305  | 0.625  | -0.024 |
| 1/8/2021   | 0.341  | 0.751  | 0.238  | -0.091 | -0.084 | 0.126  |
| 1/11/2021  | -0.554 | -0.697 | -0.585 | 1.056  | -0.047 | -0.210 |
| 1/12/2021  | -0.047 | 0.067  | 0.708  | 0.428  | -0.410 | -0.180 |
| 1/13/2021  | 0.347  | 0.295  | -0.226 | -0.226 | 0.084  | 0.083  |
| 1/14/2021  | -0.409 | -0.112 | 0.489  | 0.562  | 1.638  | 1.808  |
| 1/15/2021  | -0.667 | -0.754 | -0.608 | 0.109  | 0.660  | -0.329 |
| 1/19/2021  | 0.812  | 0.633  | -0.111 | 0.502  | -0.366 | -0.832 |

|           |        |        |        |        |        |        |
|-----------|--------|--------|--------|--------|--------|--------|
| 1/20/2021 | 1.482  | 1.175  | 0.334  | 0.099  | 0.484  | -0.653 |
| 1/21/2021 | 0.281  | 0.296  | 0.141  | 0.417  | -0.082 | -0.265 |
| 1/22/2021 | -0.234 | -0.393 | -0.584 | 0.264  | -0.165 | 0.015  |
| 1/25/2021 | 0.456  | 0.252  | -0.076 | -0.238 | 0.211  | 0.860  |
| 1/26/2021 | 0.028  | -0.133 | 0.093  | 0.443  | 0.328  | 0.202  |
| 1/27/2021 | -2.519 | -2.083 | -1.030 | -0.117 | 1.110  | -0.282 |
| 1/28/2021 | 0.890  | 0.311  | 0.632  | -0.113 | 1.522  | -0.166 |
| 1/29/2021 | -1.966 | -1.804 | -0.421 | -0.045 | 0.314  | -0.431 |
| 2/1/2021  | 1.505  | 1.375  | 0.040  | -0.252 | -0.453 | -0.747 |
| 2/2/2021  | 1.222  | 1.142  | 0.110  | 0.481  | -1.570 | 0.782  |
| 2/3/2021  | 0.253  | 0.348  | -0.079 | 0.224  | 0.177  | 1.441  |
| 2/4/2021  | 0.963  | 0.529  | 0.020  | -0.211 | -0.289 | 0.882  |
| 2/5/2021  | 0.415  | 0.522  | -0.283 | 0.020  | -2.068 | -0.237 |
| 2/8/2021  | 0.599  | 0.624  | -0.189 | -0.285 | 0.316  | 0.284  |
| 2/9/2021  | -0.161 | 0.026  | 0.000  | -0.412 | -2.136 | 0.875  |
| 2/10/2021 | 0.033  | 0.149  | 0.107  | -0.185 | -1.935 | 0.335  |
| 2/11/2021 | 0.121  | 0.153  | -0.136 | 0.166  | -0.529 | 2.070  |
| 2/12/2021 | 0.337  | 0.362  | -0.515 | -0.319 | 0.076  | 0.740  |
| 2/16/2021 | -0.034 | 0.378  | -2.130 | 0.332  | -1.553 | 0.646  |
| 2/17/2021 | -0.013 | -0.291 | -0.373 | -1.002 | -0.264 | 0.089  |
| 2/18/2021 | -0.367 | -0.458 | 0.928  | 0.266  | -1.716 | -0.276 |
| 2/19/2021 | -0.218 | -0.031 | 0.525  | -0.414 | 0.358  | 0.655  |
| 2/22/2021 | -0.713 | -0.605 | 0.211  | 0.470  | 0.011  | 0.037  |
| 2/23/2021 | 0.194  | 0.114  | 0.097  | -0.713 | 0.751  | -0.273 |
| 2/24/2021 | 0.885  | 0.346  | -0.404 | -0.576 | 0.536  | -0.270 |
| 2/25/2021 | -2.411 | -1.237 | -0.665 | 1.237  | -0.952 | -0.341 |
| 2/26/2021 | -0.441 | -1.365 | -0.518 | -0.285 | -0.675 | 0.008  |
| 3/1/2021  | 2.223  | 1.912  | 0.303  | -0.451 | -0.090 | -0.018 |
| 3/2/2021  | -0.798 | -0.415 | -0.768 | 0.066  | -0.421 | -0.096 |
| 3/3/2021  | -1.260 | -0.603 | 0.010  | -0.230 | 0.500  | -0.736 |
| 3/4/2021  | -1.139 | -1.038 | -0.269 | -0.359 | -1.575 | -0.373 |
| 3/5/2021  | 1.956  | 0.842  | 0.008  | -0.439 | 0.102  | -0.363 |
| 3/8/2021  | -0.485 | -0.272 | -0.682 | -0.088 | 0.527  | -1.833 |
| 3/9/2021  | 1.220  | 1.116  | 0.225  | -0.010 | -2.235 | 0.559  |
| 3/10/2021 | 0.524  | 0.485  | -0.221 | -0.398 | -0.243 | 2.318  |
| 3/11/2021 | 0.939  | 1.020  | 0.523  | 0.408  | 0.145  | 0.316  |
| 3/12/2021 | 0.065  | -0.070 | 0.002  | 0.268  | 0.818  | -0.020 |
| 3/15/2021 | 0.674  | 0.374  | -1.578 | -0.043 | -1.224 | 0.108  |
| 3/16/2021 | 0.131  | 0.247  | -0.113 | 0.171  | -1.310 | 0.173  |
| 3/17/2021 | 0.267  | 0.035  | 0.500  | 0.192  | -0.236 | 0.206  |
| 3/18/2021 | -1.317 | -0.617 | 0.112  | -0.571 | 1.957  | 1.415  |
| 3/19/2021 | -0.062 | -0.375 | 0.100  | -0.078 | 1.408  | 0.758  |
| 3/22/2021 | 0.794  | 0.489  | 0.583  | -1.043 | -0.148 | 0.143  |
| 3/23/2021 | -0.711 | -0.659 | -0.171 | -0.668 | -0.608 | 0.889  |
| 3/24/2021 | -0.540 | -0.628 | 0.418  | 0.600  | 0.961  | 0.186  |
| 3/25/2021 | 0.468  | 0.233  | 0.109  | 0.776  | 0.946  | -0.129 |
| 3/26/2021 | 1.679  | 1.493  | 0.002  | 0.241  | -0.577 | -1.614 |

|           |        |        |        |        |        |        |
|-----------|--------|--------|--------|--------|--------|--------|
| 3/29/2021 | -0.008 | 0.039  | -0.006 | -0.727 | 1.693  | -4.260 |
| 3/30/2021 | -0.366 | -0.321 | 0.523  | 0.190  | -0.453 | 0.279  |
| 3/31/2021 | 0.340  | 0.074  | -1.102 | -0.600 | 0.050  | -0.918 |
| 4/1/2021  | 1.202  | 1.050  | 1.129  | 0.589  | -1.717 | 1.638  |
| 4/5/2021  | 1.511  | 1.243  | 0.129  | -1.185 | 0.000  | 0.000  |
| 4/6/2021  | -0.133 | 0.030  | -0.160 | 0.210  | 0.000  | 0.000  |
| 4/7/2021  | 0.338  | 0.263  | 0.351  | 0.121  | -0.725 | -0.013 |
| 4/8/2021  | 0.359  | 0.346  | 0.047  | 0.425  | 0.714  | -0.971 |
| 4/9/2021  | 0.870  | 0.555  | 0.265  | 0.077  | 0.361  | 1.272  |
| 4/12/2021 | -0.154 | -0.168 | 0.347  | 0.426  | -1.167 | 0.850  |
| 4/13/2021 | 0.197  | 0.243  | -0.064 | -0.714 | 0.404  | 0.772  |
| 4/14/2021 | -0.425 | -0.088 | 0.434  | -0.493 | 0.058  | 0.909  |
| 4/15/2021 | 1.151  | 0.968  | 0.053  | 0.435  | 0.425  | 1.469  |
| 4/16/2021 | 0.390  | 0.419  | -0.137 | 0.062  | 0.298  | 0.107  |
| 4/19/2021 | -0.443 | -0.240 | 0.750  | 1.067  | 0.314  | -1.226 |
| 4/20/2021 | -0.707 | -0.908 | -0.002 | 1.023  | 0.958  | 0.634  |
| 4/21/2021 | 0.904  | 0.455  | -0.379 | -0.184 | 0.826  | 0.626  |
| 4/22/2021 | -0.989 | -0.371 | 0.172  | 0.004  | 0.586  | -0.759 |
| 4/23/2021 | 1.141  | 0.775  | 0.021  | 0.375  | 0.372  | 0.125  |
| 4/26/2021 | 0.182  | 0.294  | 0.741  | -0.081 | -0.444 | 0.619  |
| 4/27/2021 | 0.048  | -0.079 | -0.028 | 0.288  | 0.489  | 0.089  |
| 4/28/2021 | -0.073 | 0.083  | 0.178  | -0.256 | -0.222 | 0.967  |
| 4/29/2021 | 0.784  | 0.483  | 0.192  | 0.157  | -0.183 | 0.688  |
| 4/30/2021 | -0.770 | -0.893 | 0.015  | -0.201 | 0.217  | -0.025 |
| 5/3/2021  | 0.258  | 0.319  | 0.483  | 0.436  | 0.078  | 0.547  |
| 5/4/2021  | -0.723 | -0.806 | 0.009  | 0.259  | -0.528 | 0.699  |
| 5/5/2021  | 0.030  | 0.412  | 0.700  | 0.332  | -0.941 | 0.156  |
| 5/6/2021  | 0.939  | 0.749  | -0.395 | 0.798  | 0.214  | 1.074  |
| 5/7/2021  | 0.661  | 0.867  | 0.249  | 0.248  | 1.311  | 0.634  |
| 5/10/2021 | -1.049 | -0.554 | 0.035  | 0.476  | -0.294 | 0.397  |
| 5/11/2021 | -0.854 | -1.279 | 0.261  | -0.397 | 0.394  | -0.470 |
| 5/12/2021 | -2.157 | -1.616 | 0.289  | 0.109  | -0.155 | -1.214 |
| 5/13/2021 | 1.359  | 0.452  | 0.620  | 0.000  | 0.000  | -0.874 |
| 5/14/2021 | 1.426  | 1.481  | -0.070 | 0.000  | 0.000  | 0.000  |
| 5/17/2021 | -0.237 | -0.120 | 2.875  | 0.000  | 0.078  | 0.000  |
| 5/18/2021 | -0.905 | -0.133 | 0.670  | 0.418  | 0.089  | -0.978 |
| 5/19/2021 | -0.196 | -0.622 | -0.677 | 0.146  | -1.480 | -0.973 |
| 5/20/2021 | 0.987  | 0.925  | -0.717 | -0.948 | 0.378  | 0.836  |
| 5/21/2021 | -0.076 | 0.029  | 0.549  | 0.466  | -0.028 | 1.202  |
| 5/24/2021 | 1.001  | 0.727  | 0.595  | 0.118  | -0.006 | 4.053  |
| 5/25/2021 | -0.151 | 0.062  | -0.187 | -0.674 | -0.474 | 1.459  |
| 5/26/2021 | 0.133  | 0.132  | -0.137 | -0.617 | -0.119 | -0.259 |
| 5/27/2021 | -0.019 | -0.119 | -0.128 | -0.898 | -0.102 | -1.736 |
| 5/28/2021 | 0.109  | 0.329  | -0.966 | 0.419  | 0.998  | 1.714  |
| 6/1/2021  | -0.126 | 0.311  | -0.948 | 0.248  | -0.365 | 0.000  |
| 6/2/2021  | 0.198  | 0.139  | 1.481  | 0.096  | 0.304  | 0.000  |
| 6/3/2021  | -0.326 | -0.385 | -0.481 | 0.098  | -0.157 | -0.297 |

|           |        |        |        |        |        |        |
|-----------|--------|--------|--------|--------|--------|--------|
| 6/4/2021  | 0.840  | 0.776  | -0.297 | 0.052  | 0.890  | -0.349 |
| 6/7/2021  | 0.065  | 0.065  | 0.793  | 0.318  | 0.056  | 0.171  |
| 6/8/2021  | -0.042 | 0.020  | 0.389  | -0.375 | 0.150  | 0.993  |
| 6/9/2021  | -0.170 | -0.179 | 0.507  | 0.073  | 0.599  | 0.198  |
| 6/10/2021 | 0.444  | 0.345  | -0.644 | -0.141 | 0.226  | 0.371  |
| 6/11/2021 | 0.203  | 0.146  | 0.009  | 0.191  | -0.199 | -0.017 |
| 6/14/2021 | 0.235  | 0.194  | -0.051 | 0.767  | 0.066  | 0.096  |
| 6/15/2021 | -0.222 | -0.028 | 0.971  | -0.501 | -0.415 | 0.300  |
| 6/16/2021 | -0.466 | -0.271 | 1.204  | -0.471 | -0.078 | 0.407  |
| 6/17/2021 | -0.023 | -0.439 | 1.190  | -0.889 | 0.249  | -0.138 |
| 6/18/2021 | -1.387 | -1.378 | -0.929 | -0.029 | 0.937  | -0.530 |
| 6/21/2021 | 1.334  | 0.835  | -0.577 | 1.310  | -0.159 | 0.360  |
| 6/22/2021 | 0.537  | 0.523  | 0.338  | 0.113  | -0.352 | 0.246  |
| 6/23/2021 | -0.184 | -0.053 | 0.447  | 0.245  | -0.475 | -0.347 |
| 6/24/2021 | 0.505  | 0.488  | 0.363  | -0.303 | 0.448  | -0.349 |
| 6/25/2021 | 0.317  | 0.421  | 0.515  | -0.187 | 0.297  | 0.289  |
| 6/28/2021 | 0.346  | 0.000  | -2.090 | 0.277  | 0.060  | 0.028  |
| 6/29/2021 | 0.097  | -0.004 | 0.031  | -0.880 | 0.521  | -0.046 |
| 6/30/2021 | 0.102  | -0.182 | -0.990 | 0.196  | 0.561  | 0.099  |
| 7/1/2021  | 0.516  | 0.311  | 0.540  | 0.098  | -0.758 | 0.685  |
| 7/2/2021  | 0.885  | 0.559  | 0.341  | -0.055 | 0.153  | -0.156 |
| 7/6/2021  | -0.057 | -0.136 | 0.355  | -1.567 | 0.774  | 0.466  |
| 7/7/2021  | 0.394  | 0.193  | 1.291  | 0.702  | 0.385  | 0.694  |
| 7/8/2021  | -0.921 | -0.983 | 0.759  | 0.157  | 0.173  | 1.198  |
| 7/9/2021  | 1.065  | 0.919  | 1.438  | -0.097 | -0.373 | -0.153 |
| 7/12/2021 | 0.366  | 0.580  | -0.511 | 0.154  | -0.739 | -0.857 |
| 7/13/2021 | -0.245 | -0.068 | -0.166 | 0.230  | -0.071 | 0.022  |
| 7/14/2021 | 0.235  | 0.032  | 0.996  | 0.108  | -0.033 | 0.532  |
| 7/15/2021 | -0.321 | -0.432 | -0.167 | -0.182 | 0.229  | 1.333  |
| 7/16/2021 | -0.779 | -0.688 | -0.811 | 0.144  | 0.098  | -0.130 |
| 7/19/2021 | -1.643 | -1.734 | -0.476 | 0.325  | 0.624  | -0.129 |
| 7/20/2021 | 1.452  | 0.846  | -1.803 | -0.174 | 0.000  | 0.000  |
| 7/21/2021 | 0.824  | 0.916  | 0.778  | 0.000  | 0.000  | 0.000  |
| 7/22/2021 | 0.301  | 0.399  | 0.058  | 0.000  | 0.701  | 0.032  |
| 7/23/2021 | 1.102  | 0.633  | -0.061 | 0.286  | 0.204  | -0.206 |
| 7/26/2021 | 0.282  | 0.100  | -0.466 | -0.138 | 0.032  | 0.275  |
| 7/27/2021 | -0.564 | -0.588 | 0.312  | 0.220  | 0.332  | -1.173 |
| 7/28/2021 | -0.105 | -0.004 | -0.118 | 0.121  | -0.520 | -0.240 |
| 7/29/2021 | 0.361  | 0.927  | 1.416  | 0.685  | -0.124 | 0.784  |
| 7/30/2021 | -0.718 | -0.798 | 0.125  | -0.043 | 0.000  | -0.260 |
| 8/2/2021  | -0.186 | 0.308  | 0.184  | 1.015  | -0.156 | -0.612 |
| 8/3/2021  | 0.790  | 0.490  | -0.374 | -0.222 | -0.005 | -0.502 |
| 8/4/2021  | -0.445 | -0.235 | -0.322 | -0.152 | -0.578 | 0.119  |
| 8/5/2021  | 0.571  | 0.406  | 0.450  | 0.247  | 0.087  | 0.259  |
| 8/6/2021  | 0.189  | -0.083 | -0.693 | -0.011 | -0.510 | 1.315  |
| 8/9/2021  | -0.184 | -0.068 | 0.529  | 0.060  | 0.358  | 0.911  |
| 8/10/2021 | 0.075  | 0.175  | -0.276 | 0.359  | 0.016  | -0.167 |

|            |        |        |        |        |        |        |
|------------|--------|--------|--------|--------|--------|--------|
| 8/11/2021  | 0.290  | 0.325  | 0.349  | 0.411  | 0.384  | -0.062 |
| 8/12/2021  | 0.357  | 0.178  | -0.303 | -0.294 | -0.097 | 0.059  |
| 8/13/2021  | 0.236  | 0.256  | 1.152  | 0.555  | 0.221  | 0.286  |
| 8/16/2021  | 0.394  | -0.083 | -0.367 | 0.682  | 0.420  | 0.783  |
| 8/17/2021  | -0.778 | -0.795 | 0.667  | -0.529 | 0.418  | 2.806  |
| 8/18/2021  | -1.150 | -0.726 | -0.574 | -0.083 | -0.295 | -0.463 |
| 8/19/2021  | 0.226  | -0.578 | -0.066 | -0.133 | 0.300  | -1.485 |
| 8/20/2021  | 0.894  | 0.454  | 0.835  | -0.082 | -0.354 | 0.719  |
| 8/23/2021  | 0.772  | 1.040  | 0.191  | 1.134  | -0.193 | 0.726  |
| 8/24/2021  | 0.173  | 0.459  | 0.311  | 0.340  | 0.032  | -0.014 |
| 8/25/2021  | 0.221  | 0.099  | -1.023 | -0.064 | -0.458 | -0.561 |
| 8/26/2021  | -0.573 | -0.502 | 0.463  | 0.465  | -0.043 | 0.311  |
| 8/27/2021  | 0.891  | 0.667  | -0.312 | 0.605  | -0.124 | 0.018  |
| 8/30/2021  | 0.461  | 0.432  | 0.322  | 0.389  | -0.461 | -0.724 |
| 8/31/2021  | -0.159 | 0.043  | -0.342 | -0.610 | -0.136 | -1.790 |
| 9/1/2021   | 0.032  | 0.282  | 1.060  | 0.428  | 0.434  | -0.411 |
| 9/2/2021   | 0.178  | 0.230  | 0.035  | 0.185  | 0.895  | -1.022 |
| 9/3/2021   | -0.021 | 0.058  | -0.192 | 0.319  | -0.258 | -1.088 |
| 9/7/2021   | -0.291 | -0.047 | 0.837  | -0.962 | 0.081  | -1.141 |
| 9/8/2021   | -0.159 | -0.355 | -1.516 | 0.083  | 0.113  | 0.534  |
| 9/9/2021   | -0.533 | -0.537 | 0.848  | 1.026  | -0.641 | 0.893  |
| 9/10/2021  | -0.837 | -0.418 | 0.520  | -0.448 | 0.254  | 0.496  |
| 9/13/2021  | 0.375  | 0.193  | 0.232  | -0.051 | -0.178 | 0.286  |
| 9/14/2021  | -0.580 | -0.336 | -0.682 | 0.230  | 0.507  | -0.178 |
| 9/15/2021  | 0.804  | 0.308  | -0.255 | -0.043 | -0.242 | -0.284 |
| 9/16/2021  | -0.157 | -0.229 | 0.076  | -0.628 | -0.070 | 0.590  |
| 9/17/2021  | -1.016 | -0.805 | -0.090 | 0.507  | 0.000  | 1.491  |
| 9/20/2021  | -1.760 | -1.643 | 0.724  | -1.163 | -0.135 | -0.644 |
| 9/21/2021  | -0.108 | 0.065  | -0.479 | -0.551 | 0.038  | -1.968 |
| 9/22/2021  | 0.800  | 0.794  | 0.733  | 0.367  | -0.590 | -0.460 |
| 9/23/2021  | 1.192  | 1.062  | 0.930  | 0.669  | 0.114  | -0.050 |
| 9/24/2021  | 0.098  | -0.087 | -0.718 | 0.213  | 0.928  | -0.113 |
| 9/27/2021  | -0.326 | -0.131 | -0.180 | -0.452 | -0.668 | -0.015 |
| 9/28/2021  | -2.145 | -1.860 | -0.120 | 0.013  | 0.964  | -0.424 |
| 9/29/2021  | 0.104  | -0.166 | 0.590  | -0.336 | 1.225  | -0.127 |
| 9/30/2021  | -1.203 | -0.840 | 0.634  | 0.215  | 0.749  | 0.527  |
| 10/1/2021  | 1.198  | 0.560  | 0.990  | -0.441 | 0.026  | 1.205  |
| 10/4/2021  | -1.452 | -0.921 | -0.108 | -0.186 | -0.966 | 0.071  |
| 10/5/2021  | 1.060  | 0.672  | 0.307  | -0.453 | 0.892  | -1.494 |
| 10/6/2021  | 0.479  | -0.025 | 0.731  | 0.243  | 0.451  | -0.124 |
| 10/7/2021  | 0.833  | 1.157  | 0.863  | 0.161  | 0.470  | -0.801 |
| 10/8/2021  | -0.187 | 0.028  | -0.605 | 0.505  | 0.099  | -0.778 |
| 10/11/2021 | -0.682 | -0.234 | -0.422 | 0.294  | -0.977 | 0.000  |
| 10/12/2021 | -0.364 | -0.409 | 0.274  | 0.224  | 0.967  | 0.000  |
| 10/13/2021 | 0.293  | 0.337  | 0.186  | 0.324  | 0.689  | -0.216 |
| 10/14/2021 | 1.779  | 1.491  | 0.216  | 0.967  | 0.736  | 0.408  |
| 10/15/2021 | 0.795  | 0.949  | 0.729  | 0.104  | 0.924  | 0.909  |

|            |        |        |        |        |        |        |
|------------|--------|--------|--------|--------|--------|--------|
| 10/18/2021 | 0.262  | 0.075  | -0.503 | 0.857  | -0.310 | -0.289 |
| 10/19/2021 | 0.738  | 0.661  | 0.456  | -0.209 | -0.046 | -1.100 |
| 10/20/2021 | 0.351  | 0.427  | 0.717  | -0.239 | 0.808  | 0.000  |
| 10/21/2021 | 0.246  | 0.066  | -0.490 | 0.199  | -0.162 | 0.000  |
| 10/22/2021 | -0.303 | 0.062  | 0.893  | -0.140 | -0.046 | 0.491  |
| 10/25/2021 | 0.151  | 0.280  | -0.427 | 0.171  | -0.107 | -1.118 |
| 10/26/2021 | 0.378  | 0.427  | 0.622  | 1.086  | -0.112 | -0.300 |
| 10/27/2021 | -0.300 | -0.291 | -0.930 | 0.453  | 0.264  | 0.002  |
| 10/28/2021 | 0.948  | 0.828  | 0.252  | 0.942  | 0.490  | 0.768  |
| 10/29/2021 | 0.126  | -0.150 | -0.492 | -0.508 | 0.252  | -0.043 |
| 11/1/2021  | -0.078 | 0.374  | -0.192 | 0.140  | -0.727 | -0.990 |
| 11/2/2021  | 0.532  | 0.253  | 0.283  | 0.732  | -0.916 | -0.368 |
| 11/3/2021  | 0.707  | 0.509  | -0.507 | 0.106  | 0.286  | -0.022 |
| 11/4/2021  | 0.581  | 0.563  | 0.274  | -0.517 | -0.245 | -0.869 |
| 11/5/2021  | 0.474  | 0.231  | 0.036  | -0.441 | 1.032  | -1.107 |
| 11/8/2021  | 0.203  | 0.095  | 0.237  | -0.169 | 0.444  | -0.163 |
| 11/9/2021  | -0.009 | -0.284 | 1.150  | 0.267  | 1.022  | 0.620  |
| 11/10/2021 | -0.932 | -0.643 | -0.979 | -0.801 | -0.285 | 1.037  |
| 11/11/2021 | 0.037  | 0.000  | -0.581 | -0.003 | -1.491 | -0.250 |
| 11/12/2021 | 0.803  | 0.563  | 0.566  | -0.320 | 0.496  | -0.576 |
| 11/15/2021 | -0.013 | 0.027  | 1.233  | -0.372 | -0.015 | -0.579 |
| 11/16/2021 | 0.309  | 0.235  | 0.094  | -0.429 | -0.177 | -0.173 |
| 11/17/2021 | -0.256 | -0.258 | 0.551  | -0.069 | -0.910 | -0.433 |
| 11/18/2021 | 0.572  | 0.311  | 0.477  | -0.203 | -0.435 | 0.104  |
| 11/19/2021 | -0.110 | -0.193 | -0.531 | 0.150  | -0.473 | -0.394 |
| 11/22/2021 | -0.412 | -0.403 | -1.843 | -0.186 | 0.170  | -2.010 |
| 11/23/2021 | 0.265  | -0.095 | 0.019  | 0.067  | -1.060 | -0.639 |
| 11/24/2021 | 0.195  | 0.008  | -0.253 | -0.084 | -0.432 | -1.246 |
| 11/26/2021 | -2.419 | -2.261 | -0.957 | -0.230 | -0.413 | 1.154  |
| 11/29/2021 | 1.297  | 0.772  | -1.972 | -1.380 | -0.042 | -0.448 |
| 11/30/2021 | -1.799 | -1.551 | -0.838 | 0.236  | -0.568 | -0.845 |
| 12/1/2021  | -0.998 | -0.067 | 1.135  | 1.027  | -0.079 | -0.903 |
| 12/2/2021  | 1.301  | 0.716  | -0.377 | -0.064 | -0.768 | -1.005 |
| 12/3/2021  | -0.786 | -0.768 | -0.151 | -0.241 | -0.517 | -1.379 |
| 12/6/2021  | 1.266  | 0.869  | 0.938  | 0.474  | -0.177 | -0.995 |
| 12/7/2021  | 2.034  | 2.094  | 0.019  | 0.244  | 0.198  | -0.809 |
| 12/8/2021  | 0.295  | 0.259  | 2.136  | 0.148  | 0.437  | 1.693  |
| 12/9/2021  | -0.508 | -0.584 | -0.253 | -0.208 | 0.969  | 0.623  |
| 12/10/2021 | 0.878  | 0.531  | 0.093  | 0.364  | 1.480  | 1.372  |
| 12/13/2021 | -0.930 | -0.922 | -0.415 | 0.080  | 0.528  | 0.000  |
| 12/14/2021 | -0.730 | -0.756 | 0.372  | -0.217 | -0.773 | 0.000  |
| 12/15/2021 | 1.716  | 1.174  | -1.487 | -0.310 | 0.338  | 0.212  |
| 12/16/2021 | -0.921 | -0.215 | 1.024  | -0.007 | 0.047  | 0.261  |
| 12/17/2021 | -1.110 | -1.026 | -1.311 | -0.026 | -0.239 | -0.021 |
| 12/20/2021 | -1.080 | -1.244 | -0.156 | -0.602 | 0.952  | 0.290  |
| 12/21/2021 | 1.690  | 1.550  | 0.285  | -0.015 | -0.501 | 0.968  |
| 12/22/2021 | 0.908  | 1.045  | 0.339  | 0.179  | -0.290 | 0.817  |

|            |        |        |        |        |        |        |
|------------|--------|--------|--------|--------|--------|--------|
| 12/23/2021 | 0.532  | 0.750  | 0.379  | 0.766  | -0.213 | 1.509  |
| 12/27/2021 | 1.379  | 1.001  | 1.635  | 0.008  | -1.303 | 0.000  |
| 12/28/2021 | -0.112 | 0.079  | -0.665 | 0.297  | 0.016  | 0.000  |
| 12/29/2021 | 0.117  | 0.098  | -0.102 | 0.796  | 1.303  | -0.479 |
| 12/30/2021 | -0.308 | -0.312 | -0.506 | 0.209  | -0.172 | -1.065 |
| 12/31/2021 | -0.301 | -0.053 | 0.402  | -0.248 | 2.581  | 1.178  |
| 1/3/2022   | 0.586  | 0.458  | 0.046  | -0.638 | -0.132 | 0.290  |
| 1/4/2022   | -0.069 | 0.251  | 0.088  | 0.165  | -1.826 | 1.087  |
| 1/5/2022   | -1.908 | -1.309 | 0.409  | 0.340  | -0.233 | 0.502  |
| 1/6/2022   | -0.155 | -0.612 | 0.212  | 0.274  | 0.026  | 0.562  |
| 1/7/2022   | -0.243 | -0.099 | 0.216  | 0.594  | 0.228  | -0.018 |
| 1/10/2022  | -0.159 | -0.252 | 0.102  | -0.210 | 0.696  | -1.746 |
| 1/11/2022  | 0.886  | 0.860  | -0.105 | 0.150  | -0.154 | -0.677 |
| 1/12/2022  | 0.253  | 0.800  | 0.471  | 0.608  | 0.892  | -1.338 |
| 1/13/2022  | -1.346 | -0.937 | 0.325  | 0.297  | 0.138  | -1.050 |
| 1/14/2022  | 0.097  | -0.217 | 0.003  | 0.869  | -0.168 | 0.217  |
| 1/18/2022  | -1.960 | -1.452 | 0.192  | -1.118 | 0.087  | -0.342 |
| 1/19/2022  | -1.006 | -0.853 | -0.273 | -0.537 | -0.020 | -0.479 |
| 1/20/2022  | -1.151 | -0.351 | -0.009 | 0.068  | 1.080  | 0.971  |
| 1/21/2022  | -1.712 | -1.658 | -0.008 | 0.103  | -0.922 | 0.027  |
| 1/24/2022  | 0.223  | -0.741 | -0.283 | -0.557 | -0.367 | -0.305 |
| 1/25/2022  | -1.258 | -0.989 | -0.562 | -0.610 | -0.118 | -1.117 |
| 1/26/2022  | 0.002  | 0.278  | -0.089 | -0.048 | -0.302 | -1.109 |
| 1/27/2022  | -0.322 | -0.899 | 0.061  | -0.469 | -0.556 | -0.270 |
| 1/28/2022  | 2.585  | 1.693  | 0.884  | 0.126  | 1.170  | 0.779  |
| 1/31/2022  | 1.585  | 1.527  | -0.613 | 0.393  | 0.853  | 1.377  |
| 2/1/2022   | 0.562  | 0.757  | 0.262  | 0.454  | 1.789  | 1.512  |
| 2/2/2022   | 1.248  | 1.050  | -0.072 | 0.578  | -0.788 | 0.767  |
| 2/3/2022   | -2.760 | -1.527 | -0.075 | 0.400  | 0.035  | 0.383  |
| 2/4/2022   | 0.515  | 0.345  | -0.130 | -0.019 | 0.060  | 0.120  |
| 2/7/2022   | -0.431 | -0.106 | 0.257  | -0.207 | -0.115 | -0.218 |
| 2/8/2022   | 0.938  | 0.543  | 0.118  | -0.104 | -0.276 | 0.827  |
| 2/9/2022   | 1.381  | 1.358  | 0.356  | 0.177  | 0.251  | -0.952 |
| 2/10/2022  | -1.860 | -1.129 | 0.617  | 0.364  | 0.515  | 0.650  |
| 2/11/2022  | -2.106 | -1.571 | -0.097 | -0.396 | -0.550 | -0.408 |
| 2/14/2022  | -0.262 | -0.872 | 0.125  | -1.323 | 0.335  | -0.267 |
| 2/15/2022  | 1.688  | 1.282  | -0.125 | 0.209  | -0.145 | -0.963 |
| 2/16/2022  | 0.093  | 0.353  | 1.096  | -0.027 | -0.140 | 0.523  |
| 2/17/2022  | -2.229 | -1.540 | 0.929  | -0.229 | 0.385  | 0.264  |
| 2/18/2022  | -0.759 | -0.851 | 0.038  | -0.641 | -0.150 | 0.019  |
| 2/22/2022  | -0.970 | -1.223 | -0.856 | -1.188 | 0.359  | -0.303 |
| 2/23/2022  | -1.898 | -1.317 | -0.040 | -0.450 | -0.454 | -1.683 |
| 2/24/2022  | 1.322  | -0.450 | -1.339 | -4.743 | -0.180 | -3.309 |
| 2/25/2022  | 2.185  | 2.289  | 0.590  | 1.329  | 0.739  | 1.360  |
| 2/28/2022  | -0.574 | -0.174 | -0.630 | -0.066 | 0.189  | -0.338 |
| 3/1/2022   | -1.841 | -1.542 | 0.026  | 0.099  | -0.144 | -0.089 |
| 3/2/2022   | 1.890  | 1.071  | -0.130 | -0.846 | -1.059 | 1.125  |

|           |        |        |        |        |        |        |
|-----------|--------|--------|--------|--------|--------|--------|
| 3/3/2022  | -0.471 | -0.538 | 0.175  | -0.402 | -0.121 | 1.124  |
| 3/4/2022  | -1.083 | -1.620 | -0.716 | -1.037 | -0.590 | 0.344  |
| 3/7/2022  | -3.240 | -2.752 | 1.129  | -4.996 | 0.761  | -1.460 |
| 3/8/2022  | -0.757 | -0.811 | -0.719 | -0.311 | -0.529 | -1.259 |
| 3/9/2022  | 2.764  | 2.853  | -0.768 | 1.713  | 0.634  | -1.190 |
| 3/10/2022 | -0.523 | -0.264 | 1.282  | -1.181 | -0.352 | 0.135  |
| 3/11/2022 | -1.237 | -1.080 | 0.214  | 0.909  | 0.897  | 0.468  |
| 3/14/2022 | -0.689 | -0.587 | -1.884 | 0.111  | -0.110 | -0.078 |
| 3/15/2022 | 2.314  | 1.209  | 0.121  | -0.466 | -0.325 | 0.197  |
| 3/16/2022 | 2.363  | 2.502  | 0.786  | 0.968  | -0.286 | 0.208  |
| 3/17/2022 | 1.037  | 1.603  | -0.615 | 1.461  | 0.176  | -1.209 |
| 3/18/2022 | 1.159  | 0.886  | 0.352  | -0.505 | -0.241 | -0.354 |
| 3/21/2022 | -0.083 | 0.028  | 0.447  | -1.960 | -0.580 | 0.898  |
| 3/22/2022 | 1.235  | 1.041  | -0.144 | -0.212 | 0.035  | 0.709  |
| 3/23/2022 | -1.275 | -0.773 | 0.665  | -0.691 | -0.487 | -0.562 |
| 3/24/2022 | 1.525  | 0.888  | 0.231  | -0.211 | -1.032 | -0.405 |
| 3/25/2022 | 0.444  | 0.253  | -0.300 | 0.162  | 0.067  | 0.375  |
| 3/28/2022 | 0.918  | 0.454  | 0.294  | -1.185 | -1.140 | -0.675 |
| 3/29/2022 | 1.230  | 1.488  | 0.316  | 1.237  | 0.099  | -0.202 |
| 3/30/2022 | -0.732 | -0.381 | 1.116  | -0.094 | 0.181  | -0.705 |
| 3/31/2022 | -1.711 | -1.427 | -0.302 | 0.309  | -0.863 | -1.294 |
| 4/1/2022  | 0.237  | 0.051  | -0.366 | -0.389 | -0.923 | -0.277 |
| 4/4/2022  | 0.970  | 0.837  | 0.537  | 0.805  | -0.369 | 0.990  |
| 4/5/2022  | -1.384 | -1.046 | -0.227 | -0.202 | 0.769  | 0.263  |
| 4/6/2022  | -1.230 | -1.318 | -0.276 | -0.077 | -0.131 | -0.619 |
| 4/7/2022  | 0.300  | 0.032  | -0.678 | -0.718 | -0.016 | -0.342 |
| 4/8/2022  | -0.416 | -0.072 | 2.599  | 0.059  | -0.174 | -0.166 |
| 4/11/2022 | -1.796 | -1.494 | 0.096  | -1.393 | 1.042  | -1.038 |
| 4/12/2022 | -0.383 | -0.424 | 0.534  | 0.225  | 1.201  | 0.707  |
| 4/13/2022 | 1.157  | 0.891  | 0.174  | 0.162  | 1.009  | 1.018  |
| 4/14/2022 | -1.373 | -0.858 | 0.231  | -0.534 | 0.265  | -0.018 |
| 4/18/2022 | 0.024  | -0.139 | -0.049 | 0.438  | 0.000  | 0.000  |
| 4/19/2022 | 1.682  | 0.831  | -0.125 | -0.665 | 0.000  | 0.000  |
| 4/20/2022 | 0.044  | 0.502  | -0.137 | -0.162 | -1.014 | -0.175 |
| 4/21/2022 | -1.316 | -1.026 | -0.256 | 0.165  | 0.245  | -0.175 |
| 4/22/2022 | -2.833 | -2.615 | 0.459  | -0.097 | 0.626  | -1.108 |
| 4/25/2022 | 0.781  | -0.272 | -0.156 | -0.289 | 1.005  | -0.555 |
| 4/26/2022 | -3.096 | -2.310 | -0.073 | -0.090 | -0.579 | -1.743 |
| 4/27/2022 | 0.261  | -0.056 | 0.077  | -0.501 | -0.425 | -1.358 |
| 4/28/2022 | 2.418  | 1.886  | 0.249  | 0.972  | 0.122  | -0.781 |
| 4/29/2022 | -3.945 | -2.153 | 0.306  | 0.188  | 0.278  | 0.000  |
| 5/2/2022  | 0.611  | -0.082 | 0.137  | 0.000  | 0.000  | 0.000  |
| 5/3/2022  | 0.400  | 0.478  | 0.075  | 0.000  | 0.000  | 0.000  |
| 5/4/2022  | 2.945  | 1.740  | 0.040  | 0.000  | -0.066 | 0.000  |
| 5/5/2022  | -3.831 | -2.546 | -1.099 | -0.245 | 1.762  | -1.188 |
| 5/6/2022  | -0.541 | -0.717 | -0.527 | -0.223 | 0.808  | -2.125 |
| 5/9/2022  | -3.073 | -3.067 | -0.267 | -1.424 | 0.777  | -0.068 |

|           |        |        |        |        |        |        |
|-----------|--------|--------|--------|--------|--------|--------|
| 5/10/2022 | 0.289  | 0.144  | -0.232 | -1.677 | 1.690  | -0.790 |
| 5/11/2022 | -1.892 | -0.694 | -0.021 | -0.016 | -0.778 | 0.150  |
| 5/12/2022 | -0.349 | -0.785 | -0.297 | -1.531 | -0.374 | -0.944 |
| 5/13/2022 | 2.382  | 2.189  | 0.229  | 0.611  | 0.636  | -2.078 |
| 5/16/2022 | -0.515 | -0.129 | 0.008  | -0.212 | -0.831 | 0.166  |
| 5/17/2022 | 2.135  | 1.966  | 0.421  | 0.446  | 0.000  | 0.398  |
| 5/18/2022 | -4.251 | -2.795 | -0.801 | -0.200 | -1.648 | -2.120 |
| 5/19/2022 | -0.758 | -0.818 | -0.221 | 0.679  | 0.973  | -2.339 |
| 5/20/2022 | -0.055 | 0.394  | 0.088  | -0.319 | -0.522 | -0.704 |
| 5/23/2022 | 2.004  | 1.831  | 0.367  | -0.124 | -0.163 | -2.716 |
| 5/24/2022 | -0.917 | -0.712 | -0.780 | -0.939 | -1.797 | -0.878 |
| 5/25/2022 | 0.898  | 0.557  | -0.442 | -0.649 | -0.698 | 0.548  |
| 5/26/2022 | 2.007  | 1.390  | -0.484 | 0.254  | 0.420  | 1.135  |
| 5/27/2022 | 2.504  | 2.056  | 0.505  | -0.490 | 0.740  | 0.380  |
| 5/31/2022 | -0.461 | -0.047 | -0.580 | -0.143 | -1.949 | -0.194 |
| 6/1/2022  | -0.727 | -0.672 | 0.536  | 0.110  | -0.857 | 0.000  |
| 6/2/2022  | 1.774  | 1.186  | -0.387 | 0.660  | -0.590 | 0.000  |
| 6/3/2022  | -1.869 | -1.104 | -0.150 | 0.317  | 0.574  | 0.775  |
| 6/6/2022  | 0.359  | 0.414  | 0.452  | 0.245  | 0.201  | 0.205  |
| 6/7/2022  | 0.791  | 0.395  | -0.718 | 0.515  | -0.021 | 0.178  |
| 6/8/2022  | -1.093 | -0.645 | -0.494 | 0.276  | -0.129 | -0.004 |
| 6/9/2022  | -2.398 | -2.114 | 0.264  | -0.605 | -1.422 | -0.448 |
| 6/10/2022 | -3.127 | -2.946 | -0.653 | -0.746 | 1.025  | -0.496 |
| 6/13/2022 | -3.913 | -3.570 | -0.349 | -1.539 | -0.186 | -1.111 |
| 6/14/2022 | -0.344 | -0.703 | -0.397 | -1.772 | -1.884 | -0.755 |
| 6/15/2022 | 1.675  | 1.116  | -0.726 | 0.135  | -1.453 | -1.693 |
| 6/16/2022 | -3.178 | -2.273 | -0.204 | -0.512 | 0.043  | -1.853 |
| 6/17/2022 | 0.480  | -0.326 | -0.258 | -0.955 | -0.937 | -1.700 |
| 6/21/2022 | 2.555  | 2.271  | -0.841 | 0.673  | -0.755 | -1.610 |
| 6/22/2022 | 0.066  | -0.325 | 0.516  | -0.878 | 1.616  | -1.567 |
| 6/23/2022 | 1.062  | 0.353  | -0.507 | -1.287 | 0.806  | -0.256 |
| 6/24/2022 | 3.069  | 2.582  | -0.331 | 0.508  | -1.064 | -0.913 |
| 6/27/2022 | -0.443 | 0.233  | -0.790 | -0.677 | -0.016 | -0.346 |
| 6/28/2022 | -2.265 | -1.356 | -0.547 | -0.243 | 0.761  | 1.064  |
| 6/29/2022 | 0.106  | -0.343 | -0.176 | -0.101 | -0.155 | 3.962  |
| 6/30/2022 | -1.003 | -1.271 | -0.677 | 0.034  | -0.193 | 2.853  |
| 7/1/2022  | 0.959  | 0.333  | -0.405 | -1.375 | 0.582  | 0.511  |
| 7/5/2022  | 0.397  | -0.253 | -1.091 | -3.631 | -2.049 | 4.827  |
| 7/6/2022  | 0.422  | 0.221  | -0.475 | 0.489  | -0.120 | 1.205  |
| 7/7/2022  | 1.529  | 1.573  | -0.457 | 1.174  | 0.369  | 1.056  |
| 7/8/2022  | -0.049 | 0.078  | -0.810 | -0.035 | -0.027 | 0.878  |
| 7/11/2022 | -1.209 | -1.137 | 1.242  | -0.150 | -1.277 | 0.000  |
| 7/12/2022 | -0.871 | -0.787 | -0.065 | -0.471 | -0.115 | 0.000  |
| 7/13/2022 | -0.457 | -0.330 | -0.055 | 0.378  | -0.044 | 0.047  |
| 7/14/2022 | -0.130 | -0.881 | -1.230 | -1.424 | -0.496 | 2.903  |
| 7/15/2022 | 1.910  | 1.783  | 0.125  | 0.498  | 0.144  | -1.283 |
| 7/18/2022 | -0.954 | 0.009  | -0.595 | 0.479  | 0.721  | -2.567 |

|           |        |        |        |        |        |        |
|-----------|--------|--------|--------|--------|--------|--------|
| 7/19/2022 | 2.645  | 2.224  | -0.048 | 1.956  | -0.362 | -2.422 |
| 7/20/2022 | 0.479  | 0.479  | 1.124  | 0.497  | -0.989 | -0.757 |
| 7/21/2022 | 1.049  | 0.581  | 0.079  | 0.844  | -1.050 | 0.552  |
| 7/22/2022 | -0.930 | -0.458 | 0.294  | -0.239 | -0.823 | 0.956  |
| 7/25/2022 | -0.015 | 0.023  | -0.225 | -0.783 | -0.858 | 1.005  |
| 7/26/2022 | -1.328 | -0.876 | -0.624 | -0.050 | -2.814 | -0.598 |
| 7/27/2022 | 2.784  | 1.781  | -0.612 | -0.550 | -0.914 | 1.356  |
| 7/28/2022 | 1.146  | 1.235  | 0.172  | 0.518  | -1.854 | 2.295  |
| 7/29/2022 | 1.454  | 1.194  | -1.263 | 0.081  | 3.178  | 0.524  |
| 8/1/2022  | -0.226 | 0.009  | 1.511  | 0.395  | 0.624  | -1.561 |
| 8/2/2022  | -0.761 | -0.954 | 0.051  | -0.616 | 1.500  | 0.560  |
| 8/3/2022  | 1.879  | 1.006  | -0.061 | -0.047 | 0.097  | -0.003 |
| 8/4/2022  | 0.043  | 0.298  | 0.810  | 1.404  | 0.752  | 0.639  |
| 8/5/2022  | -0.265 | -0.193 | 0.111  | 0.257  | -0.495 | 0.852  |
| 8/8/2022  | -0.208 | 0.105  | -0.091 | 0.628  | -0.217 | 1.651  |
| 8/9/2022  | -0.460 | -0.439 | 1.720  | -0.012 | -0.596 | 0.000  |
| 8/10/2022 | 2.216  | 1.879  | 0.613  | 0.662  | 0.505  | 0.000  |
| 8/11/2022 | -0.200 | 0.104  | -0.156 | 0.292  | -1.249 | 1.536  |
| 8/12/2022 | 1.798  | 1.094  | -0.730 | -0.274 | 0.710  | -1.511 |
| 8/15/2022 | 0.466  | 0.239  | -0.169 | -0.828 | -1.047 | 0.304  |
| 8/16/2022 | 0.258  | 0.072  | -0.721 | 0.056  | -0.134 | 0.266  |
| 8/17/2022 | -0.736 | -0.653 | -0.866 | 0.670  | -0.356 | -0.471 |
| 8/18/2022 | 0.141  | 0.124  | 0.010  | 0.476  | -0.592 | -0.610 |
| 8/19/2022 | -1.348 | -1.296 | 0.170  | -0.383 | -0.112 | -0.761 |
| 8/22/2022 | -2.214 | -1.815 | -0.983 | -0.398 | -0.797 | -1.165 |
| 8/23/2022 | -0.351 | -0.283 | 3.474  | -0.176 | 0.739  | -1.016 |
| 8/24/2022 | 0.180  | 0.084  | 0.596  | -0.023 | -0.289 | -1.261 |
| 8/25/2022 | 1.373  | 1.213  | 0.060  | 0.476  | -0.456 | -1.303 |
| 8/26/2022 | -3.591 | -2.544 | 0.421  | -0.081 | 0.337  | -0.697 |
| 8/29/2022 | -0.790 | -1.000 | -1.472 | -0.697 | -0.742 | -0.123 |
| 8/30/2022 | -1.027 | -0.827 | -0.158 | -0.285 | 0.238  | -0.211 |
| 8/31/2022 | -0.854 | -0.673 | -0.428 | -0.391 | 0.598  | -0.593 |
| 9/1/2022  | 0.393  | -0.682 | -0.045 | -0.664 | -0.652 | -0.029 |
| 9/2/2022  | -1.186 | -0.157 | 0.169  | 0.480  | 0.344  | 0.359  |
| 9/6/2022  | -0.409 | -0.903 | -0.279 | 0.246  | -0.934 | 6.034  |
| 9/7/2022  | 1.871  | 0.857  | 2.061  | 0.089  | -0.203 | -2.125 |
| 9/8/2022  | 0.615  | 0.702  | 0.166  | -0.711 | 0.227  | -0.217 |
| 9/9/2022  | 1.516  | 1.707  | -0.841 | -0.104 | 0.060  | -1.233 |
| 9/12/2022 | 1.146  | 1.393  | 1.671  | 0.962  | 0.233  | -1.629 |
| 9/13/2022 | -4.559 | -3.547 | -2.536 | -0.623 | -0.442 | 0.000  |
| 9/14/2022 | 0.326  | -0.255 | 0.269  | -0.537 | -0.450 | 0.000  |
| 9/15/2022 | -1.136 | -1.002 | -0.132 | -0.639 | -0.331 | -2.450 |
| 9/16/2022 | -0.659 | -0.865 | -0.251 | 0.549  | -1.962 | -1.582 |
| 9/19/2022 | 0.768  | 0.368  | -0.579 | -0.099 | 0.583  | 0.227  |
| 9/20/2022 | -1.154 | -0.898 | 2.093  | 0.579  | -0.257 | 1.122  |
| 9/21/2022 | -1.759 | -1.507 | 0.010  | -0.725 | -1.197 | 0.029  |
| 9/22/2022 | -0.765 | -0.891 | -1.224 | -0.314 | -0.062 | -0.012 |

|            |        |        |        |        |        |        |
|------------|--------|--------|--------|--------|--------|--------|
| 9/23/2022  | -1.581 | -2.019 | -0.577 | -0.358 | 0.068  | 0.121  |
| 9/26/2022  | -0.909 | -1.208 | -1.393 | -1.348 | 0.037  | -0.464 |
| 9/27/2022  | -0.193 | -0.211 | -0.288 | -1.326 | -1.192 | -1.829 |
| 9/28/2022  | 1.745  | 1.126  | 1.275  | -1.930 | -0.832 | 0.340  |
| 9/29/2022  | -2.308 | -1.368 | 0.268  | 0.121  | -0.451 | -1.429 |
| 9/30/2022  | -1.667 | -1.035 | 0.307  | 0.114  | 0.184  | -0.353 |
| 10/3/2022  | 2.340  | 2.198  | 0.099  | -0.951 | -0.210 | -0.104 |
| 10/4/2022  | 2.994  | 3.238  | 0.178  | 1.438  | -1.152 | -1.277 |
| 10/5/2022  | -0.273 | -0.174 | -0.246 | 0.128  | -1.707 | -1.773 |
| 10/6/2022  | -1.197 | -0.850 | 0.301  | 0.471  | 0.301  | -0.827 |
| 10/7/2022  | -3.101 | -2.444 | -0.405 | -0.246 | 0.130  | 1.759  |
| 10/10/2022 | -0.749 | -0.939 | -1.039 | -0.470 | -0.346 | 0.000  |
| 10/11/2022 | -0.635 | -0.882 | 2.955  | 0.117  | -1.595 | 0.000  |
| 10/12/2022 | -0.256 | -0.275 | -0.166 | -1.203 | -0.047 | 0.792  |
| 10/13/2022 | 2.586  | 1.806  | -0.377 | -0.296 | 0.398  | -1.295 |
| 10/14/2022 | -2.348 | -1.165 | -0.185 | -0.487 | 0.798  | 1.598  |
| 10/17/2022 | 2.765  | 2.083  | -0.673 | 0.693  | 0.354  | -0.182 |
| 10/18/2022 | 1.075  | 1.043  | -0.102 | -0.147 | 0.229  | -0.290 |
| 10/19/2022 | -0.840 | -0.780 | -0.068 | -0.262 | -0.484 | 0.237  |
| 10/20/2022 | -0.706 | -0.328 | -1.000 | -0.868 | -0.309 | 0.000  |
| 10/21/2022 | 2.448  | 1.363  | 2.402  | -0.747 | 0.315  | 0.000  |
| 10/24/2022 | 1.224  | 1.083  | -0.254 | 0.027  | -0.072 | 0.408  |
| 10/25/2022 | 1.667  | 1.535  | 0.215  | 1.198  | -0.692 | -0.279 |
| 10/26/2022 | -1.088 | -0.225 | 0.343  | -0.623 | 0.159  | 0.879  |
| 10/27/2022 | -0.648 | -0.408 | -0.330 | -2.491 | 0.461  | 0.689  |
| 10/28/2022 | 2.482  | 1.323  | -0.481 | -0.256 | 0.492  | -0.833 |
| 10/31/2022 | -0.821 | -0.447 | 0.126  | -1.316 | -0.920 | 0.183  |
| 11/1/2022  | -0.681 | -0.119 | -0.480 | 0.769  | -0.669 | -0.254 |
| 11/2/2022  | -2.507 | -1.616 | -0.115 | -0.767 | 1.077  | -0.809 |
| 11/3/2022  | -1.323 | -1.347 | -0.903 | -0.769 | -1.257 | -0.163 |
| 11/4/2022  | 1.488  | 1.845  | -0.134 | 0.083  | 0.073  | -0.309 |
| 11/7/2022  | 0.932  | 1.170  | -0.510 | 0.992  | -0.080 | -0.495 |
| 11/8/2022  | 0.559  | 0.869  | 0.546  | -0.752 | -0.849 | -0.236 |
| 11/9/2022  | -2.191 | -1.673 | 1.527  | 1.537  | -0.491 | 0.304  |
| 11/10/2022 | 5.698  | 4.543  | 0.496  | -1.202 | 1.699  | 0.531  |
| 11/11/2022 | 0.916  | 1.681  | 0.369  | -0.008 | -0.505 | -0.446 |
| 11/14/2022 | -0.953 | -0.671 | 0.579  | 1.683  | 0.764  | 0.127  |
| 11/15/2022 | 0.736  | 0.847  | -0.098 | 0.739  | 0.297  | 0.053  |
| 11/16/2022 | -0.779 | -0.647 | 0.235  | 0.773  | 2.360  | 1.386  |
| 11/17/2022 | -0.224 | -0.491 | 0.117  | 1.679  | -0.685 | -0.345 |
| 11/18/2022 | 0.506  | 0.632  | 0.223  | 0.134  | 1.257  | 0.357  |
| 11/21/2022 | -0.487 | -0.705 | -0.486 | -0.889 | 1.576  | -0.495 |
| 11/22/2022 | 1.318  | 1.265  | -0.775 | 0.793  | 1.004  | -1.081 |
| 11/23/2022 | 0.715  | 0.745  | 0.525  | 0.244  | 0.963  | 0.052  |
| 11/25/2022 | -0.095 | 0.219  | -0.241 | 0.627  | -0.254 | 0.409  |
| 11/28/2022 | -1.512 | -1.361 | -0.133 | 0.551  | -0.528 | -0.378 |
| 11/29/2022 | -0.302 | -0.104 | 0.453  | 0.845  | 0.006  | 0.431  |

|            |        |        |        |        |        |        |
|------------|--------|--------|--------|--------|--------|--------|
| 11/30/2022 | 3.329  | 2.102  | 0.126  | -0.111 | 0.100  | -0.745 |
| 12/1/2022  | -0.174 | 0.747  | -0.878 | 2.362  | 1.213  | -0.023 |
| 12/2/2022  | -0.215 | -0.366 | -0.163 | 0.081  | 0.417  | -0.399 |
| 12/5/2022  | -1.799 | -1.120 | 0.290  | 2.653  | -0.694 | -1.398 |
| 12/6/2022  | -1.370 | -1.263 | 0.023  | 0.737  | 0.154  | 0.476  |
| 12/7/2022  | -0.227 | -0.326 | 0.368  | 0.938  | 0.018  | 0.754  |
| 12/8/2022  | 0.794  | 0.557  | 0.213  | 0.135  | -0.444 | 0.183  |
| 12/9/2022  | -0.738 | -0.285 | -0.036 | -0.081 | 0.235  | -0.104 |
| 12/12/2022 | 1.437  | 0.735  | -0.262 | -0.207 | 0.443  | 0.000  |
| 12/13/2022 | 0.653  | 1.170  | 0.403  | 1.273  | 0.783  | 0.000  |
| 12/14/2022 | -0.650 | -0.325 | -0.521 | 0.663  | -0.183 | -0.271 |
| 12/15/2022 | -2.628 | -2.554 | -0.068 | -0.811 | 1.827  | 0.109  |
| 12/16/2022 | -1.194 | -1.163 | -0.068 | -1.347 | 0.269  | 0.264  |
| 12/19/2022 | -0.981 | -0.724 | 0.112  | -1.264 | -0.209 | 0.149  |
| 12/20/2022 | -0.022 | 0.302  | 0.216  | -1.450 | 0.478  | -0.033 |
| 12/21/2022 | 1.440  | 1.260  | 0.158  | 0.365  | -1.163 | -0.339 |
| 12/22/2022 | -1.556 | -1.028 | 0.121  | 0.081  | 0.673  | 0.173  |
| 12/23/2022 | 0.464  | 0.319  | -0.349 | -0.054 | 0.818  | -0.205 |
| 12/27/2022 | -0.609 | -0.139 | 0.422  | 0.175  | 0.131  | 0.000  |
| 12/28/2022 | -1.194 | -1.009 | -0.625 | -0.238 | -0.291 | 0.000  |
| 12/29/2022 | 1.812  | 1.235  | 0.310  | -0.309 | 0.202  | -0.639 |
| 12/30/2022 | -0.283 | -0.356 | 0.594  | -0.793 | -1.051 | -0.061 |
| 1/3/2023   | -0.398 | -0.005 | 0.005  | 0.162  | 0.914  | 0.140  |
| 1/4/2023   | 0.608  | 0.816  | -0.803 | -1.775 | -0.060 | -0.241 |
| 1/5/2023   | -1.383 | -1.002 | 0.199  | -2.164 | 0.149  | 0.263  |
| 1/6/2023   | 2.364  | 2.075  | -0.657 | -1.614 | 0.374  | 0.163  |
| 1/9/2023   | 0.091  | 0.621  | 0.905  | 1.083  | -0.154 | -0.257 |
| 1/10/2023  | 0.625  | 0.311  | 0.322  | -0.570 | 0.272  | -0.780 |
| 1/11/2023  | 1.483  | 1.124  | -0.871 | -2.366 | 0.095  | -0.307 |
| 1/12/2023  | 0.301  | 0.705  | -0.299 | 1.787  | 1.192  | -0.289 |
| 1/13/2023  | 0.521  | 0.687  | 0.362  | 1.389  | 0.999  | -0.746 |
| 1/17/2023  | -0.202 | -0.066 | 0.008  | 0.841  | -0.941 | -1.933 |
| 1/18/2023  | -1.563 | -0.767 | 0.183  | -0.194 | 0.111  | -0.937 |
| 1/19/2023  | -0.850 | -0.970 | -1.972 | -0.690 | -0.274 | 1.710  |
| 1/20/2023  | 1.982  | 1.420  | -0.260 | -0.320 | 0.181  | 1.089  |
| 1/23/2023  | 1.306  | 0.974  | 0.548  | 0.801  | -0.444 | 0.754  |
| 1/24/2023  | -0.068 | 0.061  | -0.503 | 0.813  | -0.064 | -0.665 |
| 1/25/2023  | -0.022 | 0.109  | 0.033  | 1.145  | 0.217  | 0.915  |
| 1/26/2023  | 1.078  | 0.677  | -0.094 | -1.232 | 0.426  | -0.574 |
| 1/27/2023  | 0.519  | 0.225  | -0.114 | -0.411 | -0.105 | 0.156  |
| 1/30/2023  | -1.309 | -0.828 | 0.018  | 0.820  | 0.570  | -0.515 |
| 1/31/2023  | 1.584  | 0.789  | -0.452 | -0.571 | -0.099 | -0.244 |
| 2/1/2023   | 1.122  | 0.762  | 0.347  | -0.164 | 0.729  | 1.213  |
| 2/2/2023   | 1.680  | 1.168  | 0.424  | 0.600  | 0.075  | 0.005  |
| 2/3/2023   | -1.038 | -0.894 | -1.156 | -0.323 | 0.523  | 1.089  |
| 2/6/2023   | -0.649 | -1.100 | -0.930 | 0.156  | -0.477 | 0.374  |
| 2/7/2023   | 1.254  | 0.972  | -0.523 | 1.606  | -0.046 | -0.957 |

|           |        |        |        |        |        |        |
|-----------|--------|--------|--------|--------|--------|--------|
| 2/8/2023  | -1.090 | -0.592 | -0.059 | 1.419  | 0.109  | -0.096 |
| 2/9/2023  | -0.910 | -0.367 | -0.127 | 1.806  | 0.413  | 0.291  |
| 2/10/2023 | 0.024  | -0.182 | 0.071  | -0.332 | 0.400  | -0.178 |
| 2/13/2023 | 1.254  | 0.914  | 0.437  | -1.260 | -0.080 | -0.255 |
| 2/14/2023 | 0.018  | -0.009 | 0.211  | -0.895 | 0.011  | -0.170 |
| 2/15/2023 | 0.359  | -0.133 | -0.155 | 0.185  | -0.429 | 0.073  |
| 2/16/2023 | -1.480 | -0.737 | -0.613 | -0.148 | 0.623  | -0.055 |
| 2/17/2023 | -0.222 | -0.473 | 0.031  | 0.614  | -0.302 | 0.241  |
| 2/21/2023 | -2.188 | -1.300 | -0.104 | -1.734 | -0.441 | -1.132 |
| 2/22/2023 | -0.112 | -0.468 | -0.058 | -0.307 | 0.412  | -0.194 |
| 2/23/2023 | 0.645  | 0.309  | 0.105  | 0.631  | 0.223  | -0.723 |
| 2/24/2023 | -1.135 | -1.194 | -0.634 | 0.906  | 0.609  | -0.022 |
| 2/27/2023 | 0.363  | 0.468  | -0.221 | 0.384  | 0.869  | -1.022 |
| 2/28/2023 | -0.321 | -0.276 | -0.118 | 0.277  | 1.479  | 0.410  |
| 3/1/2023  | -0.627 | -0.219 | 0.149  | 0.067  | 0.155  | 0.006  |
| 3/2/2023  | 0.665  | 0.530  | 0.204  | -1.377 | -0.705 | -0.128 |
| 3/3/2023  | 1.653  | 1.324  | -0.425 | -0.342 | 0.322  | -0.202 |
| 3/6/2023  | 0.082  | 0.376  | -0.070 | -0.321 | -0.033 | -0.486 |
| 3/7/2023  | -1.626 | -1.456 | -0.969 | -1.186 | -1.061 | -2.140 |
| 3/8/2023  | 0.169  | -0.013 | -0.179 | -0.452 | 0.353  | -3.221 |
| 3/9/2023  | -1.922 | -1.132 | -0.050 | 0.023  | 0.140  | -0.438 |
| 3/10/2023 | -1.473 | -1.236 | 0.474  | 0.356  | 0.279  | -1.352 |
| 3/13/2023 | -0.102 | -0.405 | -0.033 | -1.821 | -1.193 | -1.841 |
| 3/14/2023 | 1.720  | 0.966  | -0.151 | -0.090 | 0.023  | -1.114 |
| 3/15/2023 | -0.331 | -1.158 | -0.494 | -2.032 | -2.216 | -2.388 |
| 3/16/2023 | 1.918  | 1.464  | -0.257 | 0.400  | -0.450 | -3.996 |
| 3/17/2023 | -0.895 | -0.546 | 0.782  | -0.523 | 0.046  | -4.394 |
| 3/20/2023 | 0.662  | 0.654  | -0.309 | 0.691  | 0.162  | 2.061  |
| 3/21/2023 | 1.376  | 1.184  | -0.583 | 0.056  | 0.110  | 2.049  |
| 3/22/2023 | -1.583 | -0.682 | 0.246  | 1.011  | 0.323  | 1.409  |
| 3/23/2023 | 0.321  | 0.473  | 1.102  | 1.203  | 0.230  | -0.110 |
| 3/24/2023 | 0.532  | -0.196 | 0.317  | -0.890 | -0.397 | 0.162  |
| 3/27/2023 | 0.051  | 0.232  | 0.186  | 1.237  | -0.219 | 1.856  |
| 3/28/2023 | -0.244 | 0.125  | 0.242  | -0.118 | -0.631 | -0.063 |
| 3/29/2023 | 1.469  | 1.250  | 0.096  | 1.009  | 0.793  | 0.730  |
| 3/30/2023 | 0.575  | 0.743  | 0.716  | 0.171  | 1.697  | -0.519 |
| 3/31/2023 | 1.516  | 1.036  | 1.280  | -0.690 | -0.734 | 0.933  |
| 4/3/2023  | 0.164  | 0.520  | 0.189  | 1.799  | -0.017 | 0.504  |
| 4/4/2023  | -0.527 | -0.228 | 0.326  | 0.198  | -1.727 | -0.751 |
| 4/5/2023  | -0.332 | -0.353 | 0.090  | 0.055  | -0.308 | -0.236 |
| 4/6/2023  | 0.558  | 0.259  | -0.080 | -0.794 | 0.273  | 0.561  |
| 4/10/2023 | -0.076 | -0.181 | 0.095  | -0.037 | 0.000  | 0.000  |
| 4/11/2023 | -0.131 | 0.301  | 0.035  | 0.874  | 0.000  | 0.000  |
| 4/12/2023 | -0.468 | -0.009 | 0.012  | -0.393 | 0.205  | -1.121 |
| 4/13/2023 | 1.451  | 1.162  | 0.500  | 2.418  | -0.451 | -1.646 |
| 4/14/2023 | -0.149 | -0.021 | 0.239  | -0.100 | -0.112 | -0.513 |
| 4/17/2023 | 0.351  | -0.064 | -0.272 | -0.336 | -1.338 | -1.032 |

|           |        |        |        |        |         |        |
|-----------|--------|--------|--------|--------|---------|--------|
| 4/18/2023 | 0.055  | 0.301  | 0.186  | -0.635 | 0.256   | -0.561 |
| 4/19/2023 | 0.030  | -0.093 | -0.002 | -0.211 | 0.059   | -0.616 |
| 4/20/2023 | -0.725 | -0.280 | 0.141  | 0.235  | 0.374   | -0.944 |
| 4/21/2023 | 0.125  | -0.043 | -0.134 | 0.068  | 0.166   | 0.000  |
| 4/24/2023 | -0.049 | 0.068  | -0.227 | 0.082  | -0.006  | 0.000  |
| 4/25/2023 | -1.570 | -1.280 | -0.010 | -0.026 | 1.082   | -0.100 |
| 4/26/2023 | -0.078 | -0.112 | -0.326 | -0.271 | 0.187   | 0.449  |
| 4/27/2023 | 2.003  | 1.248  | 0.331  | 0.603  | -0.703  | -0.062 |
| 4/28/2023 | 0.739  | 0.692  | -0.264 | 0.473  | 0.323   | -1.241 |
| 5/1/2023  | -0.038 | -0.072 | 0.000  | -0.900 | 0.000   | 0.000  |
| 5/2/2023  | -1.009 | -0.974 | 0.000  | -0.477 | 0.000   | 0.000  |
| 5/3/2023  | -0.650 | -0.261 | 0.180  | 0.378  | 0.118   | -2.384 |
| 5/4/2023  | -0.755 | -0.503 | -0.529 | -0.213 | 0.341   | -0.114 |
| 5/5/2023  | 2.031  | 1.611  | 0.246  | 0.042  | 0.981   | -1.187 |
| 5/8/2023  | 0.055  | 0.174  | 0.312  | 0.746  | 0.718   | 0.145  |
| 5/9/2023  | -0.533 | -0.475 | 0.163  | -0.880 | -0.110  | -1.825 |
| 5/10/2023 | 0.629  | 0.272  | -0.280 | 0.697  | -0.539  | -2.000 |
| 5/11/2023 | -0.095 | -0.251 | -0.270 | -0.113 | -0.507  | -2.340 |
| 5/12/2023 | -0.249 | -0.230 | 0.012  | 0.659  | 0.297   | -5.027 |
| 5/15/2023 | 0.220  | 0.319  | 0.694  | -0.153 | 0.215   | -0.547 |
| 5/16/2023 | -0.503 | -0.460 | -0.060 | 0.176  | 0.890   | 3.665  |
| 5/17/2023 | 1.210  | 0.613  | 0.060  | -0.336 | 0.940   | 2.604  |
| 5/18/2023 | 0.875  | 0.718  | 0.196  | -1.026 | -0.006  | -1.617 |
| 5/19/2023 | -0.185 | 0.080  | -0.340 | 0.101  | 0.648   | -0.509 |
| 5/22/2023 | 0.061  | 0.072  | 0.577  | 0.162  | 0.768   | -1.563 |
| 5/23/2023 | -1.156 | -0.980 | 0.089  | 0.293  | 0.957   | -0.148 |
| 5/24/2023 | -0.758 | -1.011 | -0.038 | 1.248  | 0.039   | 0.769  |
| 5/25/2023 | 1.132  | 0.402  | -0.443 | -0.516 | -0.418  | -0.490 |
| 5/26/2023 | 1.267  | 1.109  | -0.387 | 0.585  | 1.404   | 0.337  |
| 5/30/2023 | 0.095  | -0.038 | -0.017 | 1.554  | 5.970   | 3.652  |
| 5/31/2023 | -0.632 | -1.011 | -0.072 | -0.333 | -1.914  | 1.145  |
| 6/1/2023  | 1.103  | 1.171  | 0.318  | 0.230  | 0.338   | 0.000  |
| 6/2/2023  | 1.409  | 1.508  | 0.120  | 0.636  | -0.933  | 0.000  |
| 6/5/2023  | -0.136 | -0.075 | 0.086  | -1.018 | -0.566  | 0.723  |
| 6/6/2023  | 0.194  | 0.224  | -0.027 | 0.048  | -0.419  | 0.145  |
| 6/7/2023  | -0.610 | -0.428 | -0.369 | -0.009 | 1.277   | -0.195 |
| 6/8/2023  | 0.695  | 0.557  | 0.231  | 0.491  | 0.962   | -0.460 |
| 6/9/2023  | 0.166  | 0.240  | 0.409  | 0.362  | -0.395  | -0.250 |
| 6/12/2023 | 0.911  | 0.639  | 0.363  | -0.149 | 0.000   | -1.767 |
| 6/13/2023 | 0.736  | 0.855  | 0.079  | 0.768  | 5.570   | -2.269 |
| 6/14/2023 | 0.105  | 0.342  | -0.043 | 1.152  | 5.593   | -0.328 |
| 6/15/2023 | 1.244  | 0.861  | -0.082 | 1.379  | -30.548 | -1.350 |
| 6/16/2023 | -0.397 | -0.101 | 0.370  | 0.527  | -2.033  | -0.208 |
| 6/20/2023 | -0.336 | -0.785 | 0.645  | 1.449  | -1.828  | 2.486  |
| 6/21/2023 | -0.697 | -0.513 | 0.057  | -1.485 | -0.113  | 1.194  |
| 6/22/2023 | 0.596  | 0.208  | -0.036 | -0.094 | -4.236  | 0.780  |
| 6/23/2023 | -0.838 | -0.999 | 0.033  | 0.258  | -2.815  | 0.266  |

|           |        |        |        |        |        |        |
|-----------|--------|--------|--------|--------|--------|--------|
| 6/26/2023 | -0.662 | -0.342 | 0.178  | -0.022 | 0.436  | 0.026  |
| 6/27/2023 | 1.113  | 0.884  | -0.316 | 0.623  | 3.493  | 0.663  |
| 6/28/2023 | -0.062 | 0.094  | -0.085 | 0.222  | 0.000  | 0.000  |
| 6/29/2023 | 0.355  | 0.204  | -0.167 | 0.000  | 0.000  | 0.000  |
| 6/30/2023 | 1.273  | 1.087  | 0.201  | 0.000  | -0.345 | -0.349 |
| 7/3/2023  | 0.215  | 0.286  | 0.606  | 0.187  | 3.894  | 0.646  |
| 7/5/2023  | -0.183 | -0.427 | 0.214  | 0.481  | -1.722 | 0.442  |
| 7/6/2023  | -0.719 | -1.199 | -0.603 | -1.160 | -0.237 | 0.770  |
| 7/7/2023  | -0.349 | -0.086 | 0.295  | -0.223 | 3.048  | 1.950  |
| 7/10/2023 | -0.130 | 0.045  | -0.093 | -0.269 | 3.098  | 1.342  |
| 7/11/2023 | 0.621  | 0.693  | 0.354  | 0.188  | -1.650 | 0.649  |
| 7/12/2023 | 0.737  | 1.192  | 0.646  | 0.603  | -3.285 | 0.661  |
| 7/13/2023 | 1.086  | 1.174  | 0.068  | 0.252  | -2.706 | 0.071  |
| 7/14/2023 | 0.099  | 0.075  | -0.105 | 0.376  | -1.531 | -0.128 |
| 7/17/2023 | 0.307  | 0.059  | 0.327  | 0.022  | 0.800  | 1.044  |
| 7/18/2023 | 0.895  | 0.723  | -0.164 | 1.004  | 0.463  | -1.425 |
| 7/19/2023 | 0.335  | 0.177  | 0.113  | -0.073 | -0.796 | -1.270 |
| 7/20/2023 | -0.813 | -0.682 | 0.487  | 0.210  | 0.201  | -0.387 |
| 7/21/2023 | -0.051 | -0.067 | 0.064  | 0.223  | 5.321  | -0.283 |
| 7/24/2023 | 0.476  | 0.336  | -0.473 | -0.174 | -0.376 | -0.441 |
| 7/25/2023 | 0.235  | 0.390  | 0.596  | 0.383  | 0.979  | -1.985 |
| 7/26/2023 | 0.015  | -0.102 | 0.287  | 0.241  | -0.367 | -2.816 |
| 7/27/2023 | -0.744 | -0.291 | -0.499 | 0.501  | -0.112 | 0.369  |
| 7/28/2023 | 1.092  | 0.770  | -0.018 | 0.176  | -1.063 | -1.308 |
| 7/31/2023 | 0.197  | 0.270  | -0.191 | -0.100 | 1.594  | 0.013  |
| 8/1/2023  | -0.404 | -0.544 | 0.465  | 0.079  | -1.084 | 1.049  |
| 8/2/2023  | -1.389 | -1.630 | -0.093 | 0.346  | 1.234  | -1.055 |
| 8/3/2023  | -0.348 | -0.432 | -0.253 | -0.369 | -3.087 | 0.371  |
| 8/4/2023  | -0.535 | -0.072 | 0.374  | 0.208  | 1.628  | 0.601  |
| 8/7/2023  | 0.781  | 0.476  | -0.233 | 0.350  | -0.292 | -0.106 |
| 8/8/2023  | -0.392 | -0.612 | -0.227 | -0.263 | 2.621  | -1.258 |
| 8/9/2023  | -0.844 | -0.358 | 0.187  | -0.247 | -0.564 | -0.377 |
| 8/10/2023 | 0.064  | 0.286  | 0.643  | 0.064  | -0.163 | -0.597 |
| 8/11/2023 | -0.141 | -0.447 | -0.368 | -0.848 | -0.929 | -0.556 |
| 8/14/2023 | 0.620  | 0.117  | -0.534 | -0.094 | -0.547 | -0.804 |
| 8/15/2023 | -1.163 | -0.919 | -0.177 | 0.592  | 1.144  | -0.802 |
| 8/16/2023 | -0.719 | -0.792 | 0.106  | -0.039 | 0.170  | -2.366 |
| 8/17/2023 | -0.744 | -0.733 | 0.621  | -0.331 | -0.786 | 1.691  |
| 8/18/2023 | -0.112 | -0.232 | 0.274  | -0.551 | 0.118  | -0.798 |
| 8/21/2023 | 0.837  | 0.479  | 0.072  | -0.080 | -0.118 | -1.225 |
| 8/22/2023 | -0.262 | 0.008  | 0.389  | -0.023 | -0.323 | -0.118 |
| 8/23/2023 | 1.206  | 0.996  | -0.055 | -0.416 | -0.297 | -1.176 |
| 8/24/2023 | -1.327 | -0.947 | -0.139 | 0.198  | -1.890 | 0.043  |
| 8/25/2023 | 0.640  | 0.091  | -0.554 | -0.591 | -0.128 | -1.291 |
| 8/28/2023 | 0.582  | 0.811  | 0.388  | 0.638  | -0.237 | -0.131 |
| 8/29/2023 | 1.551  | 1.358  | 0.499  | 0.228  | 1.211  | -0.128 |
| 8/30/2023 | 0.400  | 0.506  | 0.588  | 0.586  | -0.074 | 0.383  |

|            |        |        |        |        |        |        |
|------------|--------|--------|--------|--------|--------|--------|
| 8/31/2023  | -0.157 | -0.261 | -0.113 | 0.502  | 0.214  | -0.506 |
| 9/1/2023   | 0.132  | 0.132  | -0.151 | -0.550 | 6.832  | -0.882 |
| 9/5/2023   | -0.393 | -0.482 | -0.648 | 0.078  | -1.559 | -0.455 |
| 9/6/2023   | -0.869 | -0.687 | 0.366  | -0.012 | -0.101 | 0.061  |
| 9/7/2023   | -0.298 | -0.362 | 0.254  | 0.340  | 0.108  | -0.572 |
| 9/8/2023   | 0.220  | 0.085  | -0.169 | -0.222 | -0.038 | 0.326  |
| 9/11/2023  | 0.841  | 0.693  | 0.348  | -0.048 | -4.902 | 0.694  |
| 9/12/2023  | -0.620 | -0.389 | -0.094 | -0.231 | -1.064 | -1.186 |
| 9/13/2023  | 0.202  | 0.073  | 0.711  | 0.253  | 2.543  | -0.097 |
| 9/14/2023  | 0.817  | 0.868  | -0.045 | -0.007 | -0.368 | 0.223  |
| 9/15/2023  | -1.177 | -0.641 | -0.226 | -0.278 | 0.105  | -0.645 |
| 9/18/2023  | 0.019  | -0.231 | 0.108  | 0.543  | -0.501 | -0.466 |
| 9/19/2023  | -0.246 | -0.183 | 0.350  | 0.538  | -0.251 | -0.411 |
| 9/20/2023  | -1.062 | -0.595 | 0.193  | -0.372 | -0.478 | -0.918 |
| 9/21/2023  | -1.623 | -1.669 | 0.336  | 0.084  | -0.474 | -0.138 |
| 9/22/2023  | -0.268 | -0.233 | 0.472  | 0.141  | 0.726  | -0.199 |
| 9/25/2023  | 0.431  | -0.012 | 0.127  | 0.347  | -1.491 | -0.327 |
| 9/26/2023  | -1.586 | -1.304 | -0.103 | 0.362  | -1.350 | -0.425 |
| 9/27/2023  | -0.130 | -0.211 | 0.222  | -0.627 | -0.164 | -1.018 |
| 9/28/2023  | 0.570  | 0.477  | 0.414  | 0.065  | -1.163 | -0.945 |
| 9/29/2023  | -0.109 | -0.004 | 1.365  | 0.255  | 0.545  | -0.174 |
| 10/2/2023  | 0.287  | -0.325 | -0.246 | -0.905 | -0.276 | 0.220  |
| 10/3/2023  | -1.467 | -1.390 | -0.579 | -0.505 | 2.016  | -0.370 |
| 10/4/2023  | 1.019  | 0.346  | 0.313  | 0.079  | -0.162 | 0.189  |
| 10/5/2023  | -0.069 | 0.234  | -0.075 | 3.246  | -1.158 | -0.245 |
| 10/6/2023  | 1.280  | 1.004  | -0.012 | 0.246  | 0.629  | -1.054 |
| 10/9/2023  | 0.448  | 0.383  | -0.024 | -1.192 | -0.492 | -0.025 |
| 10/10/2023 | 0.512  | 0.982  | 0.324  | 0.629  | 0.369  | 0.000  |
| 10/11/2023 | 0.677  | 0.547  | 0.388  | 0.271  | -0.273 | 0.000  |
| 10/12/2023 | -0.550 | -0.377 | -0.142 | 0.302  | -0.109 | 0.665  |
| 10/13/2023 | -0.712 | -0.825 | -0.328 | -0.269 | 0.546  | -0.307 |
| 10/16/2023 | 1.111  | 0.730  | -0.173 | 1.261  | 0.719  | 0.070  |
| 10/17/2023 | -0.096 | 0.071  | -0.593 | 1.454  | 1.762  | -0.120 |
| 10/18/2023 | -1.473 | -1.257 | -0.498 | 0.136  | -0.379 | -0.051 |
| 10/19/2023 | -0.854 | -0.887 | 0.214  | -0.755 | -4.159 | -0.002 |
| 10/20/2023 | -1.299 | -1.104 | 0.103  | -0.298 | 2.376  | 0.000  |
| 10/23/2023 | -0.061 | -0.193 | -0.631 | 1.547  | -0.238 | 0.000  |
| 10/24/2023 | 0.814  | 0.565  | 0.268  | -0.494 | 0.928  | -1.372 |
| 10/25/2023 | -1.514 | -0.970 | -0.213 | 0.907  | -1.617 | -0.732 |
| 10/26/2023 | -1.311 | -1.241 | -0.103 | -0.246 | -0.467 | -0.840 |
| 10/27/2023 | -0.286 | -0.236 | 0.225  | -0.184 | 1.000  | -0.022 |
| 10/30/2023 | 1.379  | 0.941  | -0.156 | 0.071  | 0.652  | -1.113 |
| 10/31/2023 | 0.494  | 0.273  | -0.085 | -1.180 | -9.620 | -0.487 |
| 11/1/2023  | 1.230  | 1.067  | 0.148  | -0.088 | 11.398 | -0.825 |
| 11/2/2023  | 1.850  | 1.941  | 0.171  | 0.541  | -0.976 | -1.407 |
| 11/3/2023  | 0.882  | 1.035  | 0.166  | 0.178  | 0.522  | -1.736 |
| 11/6/2023  | 0.393  | 0.419  | -0.102 | 0.718  | -0.946 | 0.061  |

|            |        |        |        |        |        |        |
|------------|--------|--------|--------|--------|--------|--------|
| 11/7/2023  | 0.395  | -0.116 | -0.049 | 0.911  | -0.588 | -0.776 |
| 11/8/2023  | 0.192  | 0.004  | -0.160 | 1.463  | 0.379  | 0.650  |
| 11/9/2023  | -0.931 | -0.307 | 0.546  | 0.708  | 0.492  | 1.569  |
| 11/10/2023 | 1.572  | 0.695  | 0.337  | -0.213 | -0.054 | 0.675  |
| 11/13/2023 | -0.157 | 0.107  | 0.258  | -0.565 | 0.000  | 0.000  |
| 11/14/2023 | 1.905  | 1.861  | 0.613  | 0.220  | -7.667 | 0.000  |
| 11/15/2023 | 0.146  | 0.512  | 0.050  | 0.155  | 4.835  | 1.285  |
| 11/16/2023 | 0.250  | 0.028  | -0.340 | 0.838  | -0.090 | 0.010  |
| 11/17/2023 | -0.014 | 0.245  | -0.014 | -0.133 | 0.035  | 0.332  |
| 11/20/2023 | 0.743  | 0.660  | -0.286 | 1.153  | -0.104 | 0.466  |
| 11/21/2023 | -0.239 | -0.132 | -0.066 | 0.249  | 2.397  | 0.387  |
| 11/22/2023 | 0.423  | 0.120  | -1.291 | 0.387  | -0.393 | 0.693  |
| 11/24/2023 | -0.045 | 0.243  | -0.198 | 1.069  | 1.410  | 0.138  |
| 11/27/2023 | -0.140 | -0.211 | 0.241  | 0.401  | 2.834  | -1.624 |
| 11/28/2023 | 0.195  | 0.203  | 0.521  | -1.633 | 0.862  | 0.885  |
| 11/29/2023 | -0.165 | -0.056 | 0.203  | -0.485 | -0.013 | 0.077  |
| 11/30/2023 | 0.311  | 0.290  | -0.427 | -0.523 | 0.013  | -0.834 |
| 12/1/2023  | 0.493  | 0.396  | 0.166  | -0.193 | 0.006  | 1.142  |
| 12/4/2023  | -0.675 | -0.535 | -0.262 | 0.434  | -0.434 | 0.795  |
| 12/5/2023  | 0.221  | 0.004  | -0.712 | 0.104  | 1.257  | 0.785  |
| 12/6/2023  | -0.388 | -0.072 | 0.715  | -0.781 | -1.069 | -0.797 |
| 12/7/2023  | 0.900  | 0.559  | -0.096 | 0.345  | -1.954 | 0.256  |
| 12/8/2023  | 0.422  | 0.288  | -0.026 | 0.100  | 3.706  | -0.184 |
| 12/11/2023 | -0.053 | 0.091  | -0.427 | -0.581 | -1.557 | -0.251 |
| 12/12/2023 | 0.540  | 0.377  | -0.306 | 0.115  | 0.136  | 0.000  |
| 12/13/2023 | 1.237  | 0.972  | -0.078 | 1.465  | 2.478  | 0.000  |
| 12/14/2023 | 0.169  | 0.863  | 0.624  | 0.455  | 0.740  | -0.837 |
| 12/15/2023 | 0.011  | -0.027 | 0.059  | -0.292 | -0.948 | -0.896 |
| 12/18/2023 | 0.442  | 0.112  | -0.214 | 1.114  | -4.139 | -0.734 |
| 12/19/2023 | 0.551  | 0.633  | -0.026 | -0.080 | 4.366  | -1.130 |
| 12/20/2023 | -1.378 | -0.841 | 0.404  | -0.161 | 1.956  | 0.266  |
| 12/21/2023 | 1.001  | 0.673  | -0.291 | -0.783 | 1.037  | -0.461 |
| 12/22/2023 | 0.120  | 0.176  | 0.096  | 0.296  | 0.171  | 0.554  |
| 12/26/2023 | 0.354  | 0.344  | -0.313 | -0.866 | -0.049 | 0.000  |
| 12/27/2023 | 0.140  | 0.464  | 0.181  | 1.113  | -9.668 | 0.000  |
| 12/28/2023 | 0.078  | 0.148  | 0.020  | -0.041 | 0.516  | -0.037 |
| 12/29/2023 | -0.272 | -0.239 | -0.118 | 0.200  | 0.713  | 0.197  |
| 1/2/2024   | -0.564 | -0.694 | -0.141 | 1.017  | 0.918  | 0.100  |
| 1/3/2024   | -0.754 | -0.941 | -0.510 | 0.030  | 7.369  | 1.174  |
| 1/4/2024   | -0.339 | -0.139 | -0.339 | 0.461  | -3.784 | 0.137  |
| 1/5/2024   | 0.207  | 0.189  | 0.233  | 0.255  | 5.023  | -0.156 |
| 1/8/2024   | 1.533  | 1.055  | 0.061  | -0.185 | 0.996  | 0.325  |
| 1/9/2024   | -0.116 | -0.271 | 0.094  | 0.385  | -0.239 | -1.083 |
| 1/10/2024  | 0.685  | 0.394  | 0.153  | -0.116 | -0.114 | -0.192 |
| 1/11/2024  | -0.106 | -0.080 | -0.187 | 0.023  | 2.240  | 0.505  |
| 1/12/2024  | 0.031  | 0.286  | 0.305  | 0.157  | -8.224 | -0.722 |
| 1/16/2024  | -0.309 | -0.683 | -0.294 | 2.164  | 3.882  | -0.523 |

|           |        |        |        |         |         |        |
|-----------|--------|--------|--------|---------|---------|--------|
| 1/17/2024 | -0.559 | -0.877 | -0.543 | -0.410  | 3.489   | -0.787 |
| 1/18/2024 | 0.849  | 0.686  | 0.197  | 0.418   | -0.885  | 0.280  |
| 1/19/2024 | 1.231  | 1.073  | 0.286  | 0.405   | 1.298   | -0.039 |
| 1/22/2024 | 0.149  | 0.341  | -0.763 | 2.078   | 0.429   | -0.598 |
| 1/23/2024 | 0.420  | 0.166  | 0.546  | -0.753  | -1.055  | -0.897 |
| 1/24/2024 | 0.039  | 0.505  | -0.070 | 0.027   | 1.242   | -0.413 |
| 1/25/2024 | 0.460  | 0.308  | -0.064 | -0.305  | 0.426   | -0.378 |
| 1/26/2024 | -0.082 | 0.056  | -0.340 | -0.182  | -0.006  | -1.034 |
| 1/29/2024 | 0.829  | 0.609  | -0.156 | 1.383   | -1.379  | 0.529  |
| 1/30/2024 | -0.157 | -0.078 | 0.049  | 1.970   | -6.039  | 1.481  |
| 1/31/2024 | -1.789 | -1.045 | 0.105  | -2.232  | -14.711 | 1.145  |
| 2/1/2024  | 1.307  | 0.705  | -0.014 | -0.367  | -5.207  | -0.336 |
| 2/2/2024  | 1.403  | 0.463  | -0.673 | -0.008  | -6.330  | 0.839  |
| 2/5/2024  | -0.301 | -0.339 | -0.468 | -2.036  | -1.388  | 0.210  |
| 2/6/2024  | 0.272  | 0.406  | 0.110  | -0.246  | -0.839  | -0.047 |
| 2/7/2024  | 0.839  | 0.545  | 0.038  | 1.262   | -0.393  | -0.378 |
| 2/8/2024  | -0.034 | -0.089 | -0.087 | 1.297   | -1.757  | -0.551 |
| 2/9/2024  | 0.755  | 0.502  | 0.159  | 0.214   | -0.239  | -0.100 |
| 2/12/2024 | -0.193 | -0.055 | -0.027 | 0.540   | -3.018  | 0.818  |
| 2/13/2024 | -1.364 | -1.116 | -0.335 | -0.247  | -1.419  | 1.406  |
| 2/14/2024 | 0.856  | 0.606  | -0.142 | 0.446   | 1.946   | 2.999  |
| 2/15/2024 | 0.418  | 0.661  | 0.544  | -0.041  | 1.046   | 3.519  |
| 2/16/2024 | -0.489 | -0.026 | 0.245  | 0.628   | -1.397  | 0.251  |
| 2/20/2024 | -0.651 | -0.317 | 0.684  | 0.565   | -6.360  | 1.697  |
| 2/21/2024 | 0.125  | 0.018  | 0.027  | 0.234   | -2.629  | 0.007  |
| 2/22/2024 | 2.214  | 1.753  | -0.277 | 0.350   | 2.872   | 0.700  |
| 2/23/2024 | 0.071  | 0.120  | -0.104 | 0.395   | 5.101   | 1.174  |
| 2/26/2024 | -0.508 | -0.305 | -0.088 | -0.822  | -3.075  | 0.742  |
| 2/27/2024 | 0.186  | 0.167  | 0.365  | 0.191   | -3.713  | -1.403 |
| 2/28/2024 | -0.237 | -0.371 | -0.038 | -0.308  | -2.834  | 0.026  |
| 2/29/2024 | 0.536  | 0.443  | 0.607  | -0.270  | 2.862   | -0.433 |
| 3/1/2024  | 0.642  | 0.683  | 0.059  | -0.078  | -0.038  | 1.211  |
| 3/4/2024  | -0.125 | -0.047 | -0.064 | 2.360   | -0.438  | 1.334  |
| 3/5/2024  | -1.071 | -0.694 | -0.163 | 0.380   | 2.144   | 0.681  |
| 3/6/2024  | 0.441  | 0.525  | 0.103  | -18.061 | -0.234  | 0.276  |
| 3/7/2024  | 1.072  | 0.887  | 0.579  | 1.256   | -0.422  | 0.927  |
| 3/8/2024  | -0.608 | -0.143 | -0.118 | 0.109   | 0.824   | 2.077  |
| 3/11/2024 | -0.125 | -0.283 | -0.072 | 2.225   | 0.595   | 1.115  |
| 3/12/2024 | 1.283  | 0.933  | -0.003 | -0.539  | 2.645   | 1.050  |
| 3/13/2024 | -0.143 | -0.007 | 0.163  | -1.148  | 1.346   | 2.085  |
| 3/14/2024 | -0.202 | -0.332 | -0.123 | 0.914   | -0.464  | 5.121  |
| 3/15/2024 | -0.794 | -0.663 | -0.125 | 0.597   | 0.268   | 2.656  |
| 3/18/2024 | 0.773  | 0.566  | -0.309 | -1.511  | 4.913   | -0.330 |
| 3/19/2024 | 0.572  | 0.350  | 0.222  | -0.913  | -1.481  | 1.814  |
| 3/20/2024 | 0.940  | 0.597  | 0.661  | -0.287  | -1.442  | 2.905  |
| 3/21/2024 | 0.129  | 0.628  | 0.040  | 0.555   | 6.448   | 0.768  |
| 3/22/2024 | -0.023 | -0.155 | -0.048 | -0.323  | 2.031   | 2.170  |

|           |        |        |        |        |        |        |
|-----------|--------|--------|--------|--------|--------|--------|
| 3/25/2024 | -0.349 | -0.247 | -0.110 | -0.298 | -0.702 | 3.545  |
| 3/26/2024 | -0.297 | -0.159 | 0.611  | -0.969 | 2.669  | 6.029  |
| 3/27/2024 | 0.810  | 0.670  | 0.466  | -0.407 | 2.176  | 0.209  |
| 3/28/2024 | 0.021  | -0.014 | 0.140  | -0.597 | 3.495  | -3.710 |
| 4/1/2024  | -0.176 | -0.342 | 1.074  | 1.226  | 0.000  | 0.000  |
| 4/2/2024  | -0.745 | -0.577 | 0.009  | -0.152 | 0.000  | 0.000  |
| 4/3/2024  | 0.050  | 0.092  | -0.471 | 0.152  | 1.890  | 1.464  |
| 4/4/2024  | -1.299 | -0.661 | 0.399  | 0.676  | -3.982 | 0.525  |
| 4/5/2024  | 1.136  | 0.374  | -0.481 | -0.087 | -0.641 | -0.026 |
| 4/8/2024  | -0.021 | 0.192  | 0.455  | 0.442  | -1.157 | -1.669 |
| 4/9/2024  | 0.137  | 0.202  | 0.085  | 0.486  | 1.543  | -0.930 |
| 4/10/2024 | -0.871 | -0.878 | -0.162 | 0.000  | 0.000  | 0.000  |
| 4/11/2024 | 0.876  | 0.392  | -0.102 | 0.000  | 0.000  | 0.000  |
| 4/12/2024 | -1.437 | -1.181 | -0.448 | 0.000  | 0.423  | 0.011  |
| 4/15/2024 | -1.267 | -0.991 | -0.170 | 0.683  | -0.627 | -0.919 |
| 4/16/2024 | -0.228 | -0.745 | -0.119 | -0.435 | -6.103 | -2.019 |
| 4/17/2024 | -0.584 | -0.470 | 0.138  | 0.367  | 3.492  | -1.330 |
| 4/18/2024 | -0.169 | -0.007 | -0.031 | -0.667 | -1.561 | -1.173 |
| 4/19/2024 | -1.094 | -0.928 | -0.276 | -0.100 | -1.537 | -2.030 |
| 4/22/2024 | 0.887  | 0.818  | 0.058  | -0.755 | -5.214 | -0.374 |
| 4/23/2024 | 1.212  | 1.154  | 0.037  | -1.557 | -0.364 | 0.061  |
| 4/24/2024 | 0.013  | 0.211  | -0.038 | -0.695 | -6.649 | -0.316 |
| 4/25/2024 | -0.609 | -0.342 | 0.215  | 0.418  | 0.921  | 0.374  |
| 4/26/2024 | 1.310  | 1.070  | 0.159  | -0.094 | -2.825 | 0.684  |
| 4/29/2024 | 0.284  | 0.425  | 0.032  | 0.456  | -0.231 | -0.656 |
| 4/30/2024 | -1.574 | -1.244 | -0.292 | -1.921 | 2.081  | -0.206 |
| 5/1/2024  | -0.325 | -0.514 | 0.000  | 0.763  | 0.000  | 0.000  |
| 5/2/2024  | 1.059  | 0.772  | 0.000  | 0.918  | 0.000  | 0.000  |
| 5/3/2024  | 1.389  | 1.241  | 0.290  | 0.820  | 1.684  | 0.003  |
| 5/6/2024  | 1.064  | 0.807  | 0.006  | -0.085 | 0.570  | 0.088  |
| 5/7/2024  | 0.091  | 0.330  | 0.275  | 0.775  | -0.473 | 0.257  |
| 5/8/2024  | -0.030 | -0.255 | -0.119 | -0.320 | -3.403 | 1.984  |
| 5/9/2024  | 0.470  | 0.404  | 0.161  | 0.622  | 0.544  | 1.281  |
| 5/10/2024 | 0.067  | 0.261  | 0.321  | -0.111 | -0.426 | 0.000  |
| 5/13/2024 | 0.065  | 0.173  | 0.879  | -0.089 | -0.236 | 0.000  |
| 5/14/2024 | 0.481  | 0.366  | 0.355  | -0.206 | 1.158  | 0.557  |
| 5/15/2024 | 1.152  | 1.054  | 1.017  | -0.121 | -6.799 | 0.003  |
| 5/16/2024 | -0.173 | 0.045  | -0.113 | 0.692  | -0.540 | -0.111 |
| 5/17/2024 | 0.064  | 0.076  | -0.013 | 0.216  | 2.871  | 1.110  |
| 5/20/2024 | 0.077  | 0.139  | -0.227 | 1.233  | -0.198 | 1.654  |
| 5/21/2024 | 0.397  | 0.170  | -0.813 | 0.377  | 2.263  | 1.366  |
| 5/22/2024 | -0.311 | -0.451 | -0.276 | -0.251 | -2.019 | 0.720  |
| 5/23/2024 | -0.557 | -0.397 | -0.513 | -0.525 | -0.793 | -0.921 |
| 5/24/2024 | 0.788  | 0.397  | -0.142 | -0.108 | -1.047 | -0.488 |
| 5/28/2024 | 0.234  | 0.250  | -0.030 | 0.046  | 4.428  | 0.606  |
| 5/29/2024 | -0.655 | -1.038 | -0.552 | -0.240 | 1.914  | 0.756  |
| 5/30/2024 | -0.784 | -0.375 | -0.463 | -0.292 | -3.093 | -0.112 |

|           |        |        |        |        |        |        |
|-----------|--------|--------|--------|--------|--------|--------|
| 5/31/2024 | 0.762  | 0.809  | -0.053 | 0.083  | -0.483 | -0.416 |
| 6/3/2024  | 0.333  | 0.355  | -0.011 | -0.249 | 0.177  | -0.198 |
| 6/4/2024  | 0.249  | 0.056  | 0.590  | -0.312 | -0.765 | 0.391  |
| 6/5/2024  | 1.199  | 0.826  | -0.743 | -0.994 | 0.112  | -0.001 |
| 6/6/2024  | 0.010  | 0.282  | 0.234  | 1.028  | 0.671  | 1.137  |
| 6/7/2024  | -0.090 | -0.316 | -0.070 | -0.538 | 0.056  | 0.888  |
| 6/10/2024 | 0.223  | -0.090 | -0.855 | -1.201 | 0.777  | -1.245 |
| 6/11/2024 | 0.422  | -0.041 | -0.015 | 0.402  | 0.652  | -0.360 |
| 6/12/2024 | 0.918  | 1.087  | 0.236  | 0.139  | -0.009 | 0.733  |
| 6/13/2024 | 0.223  | -0.253 | -0.322 | 0.103  | 0.966  | 0.176  |
| 6/14/2024 | 0.009  | -0.332 | -0.230 | -0.485 | 0.127  | -0.318 |
| 6/17/2024 | 0.655  | 0.373  | -0.393 | 0.000  | 0.000  | 0.000  |
| 6/18/2024 | 0.267  | 0.505  | 0.434  | 0.000  | 0.000  | 0.000  |
| 6/20/2024 | -0.267 | -0.024 | 0.610  | -0.038 | 0.510  | 0.871  |
| 6/21/2024 | -0.157 | -0.440 | -0.437 | -0.124 | -1.307 | -1.382 |
| 6/24/2024 | -0.401 | 0.021  | 0.646  | 0.239  | -0.980 | -0.466 |
| 6/25/2024 | 0.636  | 0.470  | -0.187 | 1.777  | 0.426  | -1.332 |
| 6/26/2024 | 0.331  | -0.085 | -0.063 | 0.078  | 0.037  | -0.008 |
| 6/27/2024 | 0.026  | -0.136 | -0.635 | 0.163  | -0.528 | -2.204 |
| 6/28/2024 | -0.566 | -0.212 | 0.865  | -0.233 | 0.649  | 0.370  |
| 7/1/2024  | 0.499  | 0.276  | 0.084  | -0.134 | 1.285  | 0.265  |
| 7/2/2024  | 0.673  | 0.425  | -0.012 | -0.251 | -0.192 | 0.029  |
| 7/3/2024  | 0.584  | 0.807  | 0.167  | 0.473  | 0.119  | -0.088 |
| 7/5/2024  | 0.720  | 0.550  | -0.072 | 1.566  | 0.827  | 0.560  |
| 7/8/2024  | 0.132  | 0.147  | 0.727  | 0.246  | -0.472 | 1.466  |
| 7/9/2024  | 0.215  | 0.007  | -0.460 | 0.043  | -0.950 | 0.264  |
| 7/10/2024 | 1.127  | 1.050  | 0.530  | -0.099 | -0.294 | 0.429  |
| 7/11/2024 | -1.274 | -0.205 | 0.217  | 0.578  | -0.508 | -0.791 |
| 7/12/2024 | 0.514  | 0.588  | -0.002 | 0.599  | -0.790 | 0.069  |
| 7/15/2024 | 0.222  | 0.069  | -0.655 | -0.801 | 0.984  | -0.046 |
| 7/16/2024 | 0.548  | 0.312  | 0.425  | -0.443 | 0.507  | -0.861 |
| 7/17/2024 | -1.553 | -0.834 | -0.085 | 1.178  | -0.608 | -0.314 |
| 7/18/2024 | -0.912 | -0.904 | 0.172  | 0.411  | 0.415  | -1.304 |
| 7/19/2024 | -0.661 | -0.855 | -0.146 | -0.141 | -1.428 | -0.375 |
| 7/22/2024 | 1.125  | 0.815  | -0.091 | 0.223  | 0.976  | -1.024 |
| 7/23/2024 | -0.128 | -0.134 | -0.128 | 0.002  | 0.157  | -1.418 |
| 7/24/2024 | -2.662 | -1.802 | -0.079 | 0.144  | -0.993 | -1.188 |
| 7/25/2024 | -0.844 | -0.910 | 0.012  | 0.322  | -0.552 | -0.871 |
| 7/26/2024 | 1.114  | 0.753  | 0.023  | 0.517  | -0.253 | 0.261  |
| 7/29/2024 | 0.161  | 0.184  | 0.984  | 0.298  | -2.542 | 0.140  |
| 7/30/2024 | -0.697 | -0.406 | 0.229  | 0.086  | -0.881 | 1.778  |
| 7/31/2024 | 1.660  | 1.543  | 0.217  | 0.501  | 0.058  | 0.122  |
| 8/1/2024  | -1.222 | -1.499 | 0.248  | -0.148 | -0.702 | -1.314 |
| 8/2/2024  | -1.939 | -1.886 | 0.006  | 0.790  | 2.389  | -1.060 |
| 8/5/2024  | -3.332 | -3.471 | 0.094  | -3.342 | 0.210  | -1.794 |
| 8/6/2024  | 1.042  | 1.229  | 0.421  | 1.231  | 0.314  | 0.661  |
| 8/7/2024  | -0.756 | -0.103 | -0.086 | 0.127  | 0.512  | -0.732 |

|            |        |        |        |        |        |        |
|------------|--------|--------|--------|--------|--------|--------|
| 8/8/2024   | 2.268  | 1.447  | -0.021 | 0.004  | 2.014  | -0.203 |
| 8/9/2024   | 0.502  | 0.693  | -0.113 | 0.249  | 2.255  | 1.158  |
| 8/12/2024  | 0.063  | 0.035  | 0.130  | 0.747  | -0.227 | 0.154  |
| 8/13/2024  | 1.862  | 1.571  | 0.259  | -0.262 | -0.720 | -0.256 |
| 8/14/2024  | 0.354  | 0.626  | 0.471  | 0.465  | 0.256  | 0.086  |
| 8/15/2024  | 1.662  | 1.130  | -0.043 | 0.691  | -1.157 | 0.221  |
| 8/16/2024  | 0.234  | 0.659  | 0.309  | 0.081  | 0.405  | 0.225  |
| 8/19/2024  | 1.060  | 1.004  | 0.542  | 0.250  | 0.083  | 0.073  |
| 8/20/2024  | -0.129 | -0.063 | 0.535  | 0.558  | -0.988 | 0.625  |
| 8/21/2024  | 0.399  | 0.262  | 0.419  | 0.128  | -0.642 | 1.475  |
| 8/22/2024  | -1.032 | -0.624 | 0.237  | 0.814  | 0.410  | 1.000  |
| 8/23/2024  | 1.203  | 1.182  | 0.468  | 0.335  | 0.483  | -0.369 |
| 8/26/2024  | -0.365 | -0.148 | 0.407  | -0.043 | -0.706 | 0.212  |
| 8/27/2024  | 0.102  | 0.125  | 0.351  | -0.246 | 0.168  | -0.568 |
| 8/28/2024  | -0.646 | -0.393 | 0.065  | 0.333  | 0.102  | -0.418 |
| 8/29/2024  | -0.185 | -0.142 | 0.363  | -0.189 | -0.140 | 0.063  |
| 8/30/2024  | 1.005  | 0.670  | 0.472  | -0.174 | -0.065 | 0.643  |
| 9/3/2024   | -2.176 | -1.738 | 0.863  | -0.099 | 0.780  | 1.846  |
| 9/4/2024   | -0.224 | -0.594 | 2.098  | -0.092 | -0.770 | 0.295  |
| 9/5/2024   | -0.099 | -0.347 | -1.345 | 0.386  | -1.021 | 0.329  |
| 9/6/2024   | -1.772 | -1.135 | 0.956  | 0.148  | 0.366  | 0.028  |
| 9/9/2024   | 1.108  | 0.596  | -0.457 | -0.411 | 0.187  | 0.617  |
| 9/10/2024  | 0.505  | 0.037  | 0.129  | -0.634 | -0.169 | 0.446  |
| 9/11/2024  | 1.287  | 0.677  | -0.021 | -0.096 | 1.230  | 0.129  |
| 9/12/2024  | 0.791  | 0.973  | 0.351  | -0.224 | 1.453  | -1.243 |
| 9/13/2024  | 0.466  | 0.606  | 0.515  | 0.923  | 0.809  | -0.211 |
| 9/16/2024  | -0.002 | 0.086  | 0.059  | -0.323 | 1.125  | 0.888  |
| 9/17/2024  | 0.010  | -0.043 | -0.028 | -0.052 | -0.458 | -0.680 |
| 9/18/2024  | -0.261 | -0.299 | -0.106 | 0.578  | 0.637  | 0.620  |
| 9/19/2024  | 1.798  | 1.634  | -0.145 | 1.274  | -1.096 | -0.076 |
| 9/20/2024  | -0.212 | -0.427 | 0.076  | 0.480  | -0.027 | -0.720 |
| 9/23/2024  | 0.220  | 0.227  | 0.259  | -0.057 | 0.144  | 0.296  |
| 9/24/2024  | 0.325  | 0.510  | -0.124 | -0.442 | 1.576  | 0.530  |
| 9/25/2024  | -0.035 | -0.105 | 1.457  | 0.905  | -1.233 | 1.335  |
| 9/26/2024  | 0.378  | 0.833  | 0.178  | 0.376  | -0.622 | -0.381 |
| 9/27/2024  | -0.162 | 0.246  | 0.264  | 0.385  | 0.352  | -0.018 |
| 9/30/2024  | 0.479  | -0.133 | -0.420 | -0.466 | 0.432  | -0.061 |
| 10/1/2024  | -1.060 | -0.845 | -0.370 | -0.663 | -0.045 | 0.301  |
| 10/2/2024  | -0.065 | -0.140 | -0.267 | -1.728 | -1.093 | 0.438  |
| 10/3/2024  | -0.105 | -0.268 | -0.408 | 0.670  | 0.543  | 0.559  |
| 10/4/2024  | 0.866  | 0.461  | -0.256 | -0.191 | 0.072  | 0.151  |
| 10/7/2024  | -1.002 | -0.343 | -0.001 | -0.275 | -0.081 | 0.036  |
| 10/8/2024  | 1.093  | 0.262  | 0.664  | -1.524 | -0.299 | 0.575  |
| 10/9/2024  | 0.580  | 0.498  | 0.130  | 0.767  | -0.354 | 0.349  |
| 10/10/2024 | -0.173 | -0.091 | 0.791  | -0.843 | -0.009 | 0.000  |
| 10/11/2024 | 0.609  | 0.522  | 1.012  | 0.304  | 0.009  | 0.000  |
| 10/14/2024 | 0.870  | 0.671  | -0.178 | -0.862 | -0.767 | 0.552  |

|            |        |        |        |        |        |        |
|------------|--------|--------|--------|--------|--------|--------|
| 10/15/2024 | -0.687 | -0.690 | 0.028  | -0.130 | -0.616 | -0.500 |
| 10/16/2024 | 0.513  | 0.139  | 0.244  | -0.680 | -0.471 | 1.684  |
| 10/17/2024 | -0.111 | -0.036 | 0.055  | 0.495  | -0.408 | 1.704  |
| 10/18/2024 | 0.376  | 0.493  | 0.695  | -0.283 | 0.861  | 0.410  |
| 10/21/2024 | -0.074 | -0.322 | 0.865  | 0.481  | 0.285  | 0.000  |
| 10/22/2024 | 0.060  | -0.220 | -0.199 | -0.067 | 0.477  | 0.000  |
| 10/23/2024 | -1.034 | -0.818 | -0.463 | -0.162 | 1.155  | -0.168 |
| 10/24/2024 | 0.314  | 0.208  | 0.056  | 0.390  | 0.415  | -0.933 |
| 10/25/2024 | 0.060  | 0.023  | 0.144  | 0.287  | -0.180 | 1.141  |
| 10/28/2024 | 0.340  | 0.305  | -0.522 | 0.601  | -0.199 | 0.958  |
| 10/29/2024 | 0.137  | -0.104 | -0.384 | -0.125 | -0.917 | 1.585  |
| 10/30/2024 | -0.358 | -0.416 | 0.068  | -0.363 | 2.211  | -0.419 |
| 10/31/2024 | -2.205 | -1.673 | -0.212 | 0.125  | -0.951 | -0.407 |
| 11/1/2024  | 0.445  | 0.172  | 0.116  | 0.558  | 0.879  | 0.000  |
| 11/4/2024  | -0.417 | -0.003 | -0.490 | 0.129  | -0.224 | 0.000  |
| 11/5/2024  | 1.251  | 0.863  | -0.122 | 0.244  | 2.143  | 0.250  |
| 11/6/2024  | 2.454  | 1.378  | -1.072 | -0.530 | -1.750 | -0.019 |
| 11/7/2024  | 0.860  | 0.928  | 0.419  | 1.453  | 0.258  | -0.616 |
| 11/8/2024  | 0.260  | 0.115  | 0.297  | 0.590  | 0.275  | 0.251  |
| 11/11/2024 | 0.059  | -0.006 | -0.899 | 0.193  | -0.053 | -0.232 |
| 11/12/2024 | -0.205 | -0.684 | -0.658 | -0.222 | -0.507 | 0.360  |
| 11/13/2024 | 0.025  | -0.268 | -0.259 | -0.263 | 0.658  | 0.332  |
| 11/14/2024 | -0.523 | -0.220 | 0.615  | 0.202  | -0.009 | -0.006 |
| 11/15/2024 | -1.415 | -0.960 | -0.754 | 0.192  | 1.417  | -0.582 |
| 11/18/2024 | 0.358  | 0.323  | 1.315  | -0.587 | -0.526 | -0.412 |
| 11/19/2024 | 0.611  | 0.417  | -0.586 | 0.510  | 1.196  | -0.435 |
| 11/20/2024 | -0.128 | -0.286 | -0.986 | -0.397 | -0.191 | -1.371 |
| 11/21/2024 | 0.270  | 0.393  | 0.248  | -0.495 | -1.269 | -0.316 |
| 11/22/2024 | 0.296  | 0.334  | -0.190 | -0.454 | -0.610 | 0.005  |
| 11/25/2024 | 0.409  | 0.374  | -0.308 | -0.816 | -0.186 | -0.716 |
| 11/26/2024 | 0.715  | 0.142  | -0.722 | 0.599  | -0.115 | -0.958 |
| 11/27/2024 | -0.348 | -0.051 | 0.052  | 0.228  | 0.284  | -0.533 |
| 11/29/2024 | 0.570  | 0.590  | 1.036  | 0.342  | 1.102  | 0.499  |
| 12/2/2024  | 0.388  | 0.275  | -0.302 | -0.618 | -0.026 | 0.679  |
| 12/3/2024  | 0.133  | 0.322  | -0.202 | 0.408  | 1.272  | -0.055 |
| 12/4/2024  | 0.769  | 0.390  | 0.863  | 0.476  | 1.572  | 0.023  |
| 12/5/2024  | -0.101 | 0.025  | 0.317  | 0.898  | 0.874  | 1.667  |
| 12/6/2024  | 0.198  | -0.079 | 0.097  | -0.955 | 2.692  | 0.832  |
| 12/9/2024  | -0.534 | -0.254 | 0.116  | -0.192 | 0.345  | 0.281  |
| 12/10/2024 | -0.136 | -0.398 | -0.611 | -1.174 | -0.263 | 2.850  |
| 12/11/2024 | 0.884  | 0.496  | -0.330 | 0.277  | 0.573  | -0.373 |
| 12/12/2024 | -0.574 | -0.372 | -0.210 | -0.293 | -0.360 | 0.000  |
| 12/13/2024 | -0.420 | -0.524 | -0.501 | 0.360  | 0.515  | 0.000  |
| 12/16/2024 | 0.292  | 0.016  | 0.449  | 0.035  | -0.180 | -0.207 |
| 12/17/2024 | -0.180 | -0.240 | -0.098 | -0.069 | -0.598 | 0.388  |
| 12/18/2024 | -2.917 | -2.050 | 0.301  | -0.220 | 0.402  | 0.027  |
| 12/19/2024 | 0.067  | -0.790 | -0.970 | -0.538 | 0.172  | 0.816  |

|            |        |        |        |        |        |        |
|------------|--------|--------|--------|--------|--------|--------|
| 12/20/2024 | 1.054  | 0.609  | -0.164 | -0.022 | 1.202  | 0.232  |
| 12/23/2024 | 0.790  | 0.693  | 0.160  | -0.519 | 0.700  | 0.334  |
| 12/24/2024 | 1.111  | 0.799  | -0.333 | -0.419 | 1.330  | -0.166 |
| 12/26/2024 | -0.104 | 0.058  | 0.241  | -0.010 | 0.024  | 0.000  |
| 12/27/2024 | -1.203 | -0.587 | 0.091  | -0.251 | -0.293 | 0.000  |
| 12/30/2024 | -1.020 | -0.905 | -0.082 | -0.627 | -0.957 | 0.714  |
| 12/31/2024 | -0.554 | -0.309 | -0.074 | 0.582  | 0.168  | 0.954  |
| 1/2/2025   | -0.227 | -0.326 | 0.145  | 1.526  | -0.328 | 1.384  |
| 1/3/2025   | 1.366  | 0.901  | -0.594 | 2.332  | 0.743  | 0.633  |
| 1/6/2025   | 0.738  | 0.737  | 2.069  | 0.516  | 0.738  | 0.414  |
| 1/7/2025   | -1.295 | -0.671 | 1.012  | -0.384 | -0.103 | 0.565  |
| 1/8/2025   | 0.135  | -0.062 | -0.624 | 0.590  | -0.055 | 0.107  |
| 1/10/2025  | -1.519 | -1.497 | 0.139  | 0.206  | 0.906  | 0.162  |
| 1/13/2025  | 0.050  | -0.156 | -0.889 | -0.928 | -0.804 | -0.370 |
| 1/14/2025  | -0.087 | 0.166  | 0.036  | 0.831  | -0.365 | -0.027 |
| 1/15/2025  | 2.023  | 1.608  | 1.149  | 1.197  | -0.509 | -0.553 |
| 1/16/2025  | -0.533 | -0.029 | -0.281 | 0.277  | 0.231  | 0.463  |
| 1/17/2025  | 0.989  | 0.723  | 0.330  | -0.299 | 0.373  | 0.052  |
| 1/21/2025  | 0.771  | 0.924  | 0.434  | -0.768 | 0.577  | 1.386  |
| 1/22/2025  | 0.705  | 0.536  | 0.218  | 0.325  | 0.268  | 0.539  |
| 1/23/2025  | 0.558  | 0.402  | 0.265  | 0.000  | 0.588  | 0.882  |
| 1/24/2025  | -0.277 | 0.000  | 0.831  | 0.644  | 2.525  | 0.232  |
| 1/27/2025  | -1.392 | -0.960 | -0.157 | -0.316 | 2.306  | -0.224 |
| 1/28/2025  | 1.271  | 0.628  | -0.040 | -0.071 | -0.943 | -0.019 |
| 1/29/2025  | -0.512 | -0.186 | 0.015  | 1.269  | 0.801  | -1.076 |
| 1/30/2025  | 0.303  | 0.425  | 0.091  | 1.107  | 0.543  | -1.664 |
| 1/31/2025  | -0.537 | -0.601 | -0.490 | -0.580 | 0.872  | -1.991 |

**ARIAH AFR 40 AFRICA SOUTH AFRICA ACCESS AFRICA**

| \$     | \$     | \$     | \$     |
|--------|--------|--------|--------|
| 2.297  | 2.166  | 1.363  | 2.281  |
| 3.175  | 1.983  | 2.062  | 2.282  |
| -0.501 | -0.841 | -0.907 | -1.243 |
| 1.303  | 1.304  | 1.811  | 2.231  |
| -1.206 | -1.699 | -1.459 | -1.597 |
| -0.721 | 0.083  | -1.380 | 0.575  |
| -2.273 | -1.639 | -1.170 | -2.097 |
| -2.627 | -2.261 | -2.133 | -2.140 |
| 2.511  | 1.061  | 1.794  | 2.484  |
| 2.147  | 1.293  | 1.628  | 1.395  |
| -0.873 | -0.265 | -0.597 | -0.044 |
| -1.483 | 0.530  | -1.258 | 0.313  |
| 0.232  | -0.530 | 1.003  | -0.717 |
| 1.343  | 0.380  | 0.629  | 0.090  |
| 0.023  | -0.344 | 0.799  | -0.735 |
| -0.175 | 1.806  | 0.623  | 1.687  |
| 0.160  | 0.576  | 0.555  | 0.854  |
| -0.343 | -0.138 | -0.675 | -0.241 |
| -1.790 | -0.126 | -1.694 | -0.234 |
| -1.151 | -1.611 | -1.242 | -1.546 |
| 0.087  | 0.013  | -0.176 | -0.257 |
| -0.442 | -1.284 | -0.784 | -1.113 |
| 1.467  | 0.334  | 1.196  | 0.414  |
| -2.579 | -1.396 | -2.390 | -2.456 |
| -1.376 | -0.542 | -1.370 | -1.045 |
| -2.768 | -2.853 | -3.012 | -3.919 |
| -0.434 | -0.374 | 0.512  | 0.008  |
| 0.692  | 0.346  | 0.917  | 0.339  |
| -2.558 | -1.878 | -2.428 | -2.344 |
| 0.119  | -0.600 | 0.799  | 0.389  |
| 0.577  | 0.172  | 0.595  | 0.252  |
| 0.473  | 0.803  | 0.666  | 1.260  |
| 0.897  | 1.312  | 1.288  | 0.944  |
| 3.212  | 2.281  | 1.999  | 3.220  |
| -0.502 | 1.090  | 0.855  | 1.156  |
| 0.640  | -0.158 | 1.670  | 0.074  |
| -1.210 | -0.426 | -0.979 | -0.221 |
| -1.523 | -0.917 | -1.855 | -1.294 |
| -0.641 | -0.829 | -0.062 | -1.215 |
| 0.117  | 0.152  | 0.256  | -0.190 |
| -0.518 | 0.101  | 0.770  | -0.483 |
| 2.443  | 1.837  | 1.604  | 1.686  |
| 0.123  | 1.000  | 0.299  | 0.699  |
| 1.902  | 1.336  | 2.253  | 2.317  |
| 0.144  | 0.832  | -0.370 | 0.602  |

|        |        |        |        |
|--------|--------|--------|--------|
| 0.240  | -0.220 | 0.107  | -0.299 |
| -0.456 | 0.167  | 0.094  | -0.091 |
| -0.056 | 0.355  | 0.377  | 0.430  |
| -0.531 | -0.210 | -0.901 | -0.978 |
| 0.956  | 1.046  | 0.151  | 1.638  |
| -0.352 | 0.937  | -1.436 | 1.107  |
| 2.597  | 1.683  | 2.769  | 1.641  |
| -0.919 | -1.220 | -1.829 | -1.735 |
| -0.657 | -0.210 | -0.412 | 0.725  |
| 0.000  | -0.081 | 1.219  | -0.072 |
| -0.997 | -0.271 | -1.244 | -0.850 |
| 1.481  | 1.608  | 0.938  | 1.909  |
| 1.716  | 0.721  | 0.820  | 1.052  |
| 0.966  | 0.674  | 1.130  | 1.627  |
| 2.739  | 1.157  | 1.578  | 1.583  |
| -0.112 | 0.547  | -0.231 | 0.757  |
| -2.450 | -1.226 | -2.218 | -1.699 |
| -0.562 | -0.042 | -0.641 | 0.491  |
| 0.293  | -0.558 | -0.618 | -0.498 |
| 0.645  | 0.038  | 0.802  | -0.111 |
| -0.145 | -0.616 | -1.424 | -0.748 |
| -2.923 | -1.969 | -2.054 | -2.132 |
| 0.613  | 1.070  | 1.317  | 1.403  |
| -0.961 | -0.523 | -0.790 | -0.127 |
| -0.230 | 0.836  | -0.588 | 0.775  |
| 1.489  | 1.273  | 2.202  | 1.423  |
| 0.234  | -0.301 | 0.211  | 0.141  |
| 0.078  | 0.013  | 0.561  | 0.169  |
| 0.257  | 0.717  | 0.102  | -0.589 |
| -0.843 | -2.083 | -0.463 | -2.587 |
| -0.653 | -0.434 | 0.078  | -0.112 |
| 0.598  | 0.557  | 0.067  | 0.009  |
| -1.009 | -0.736 | -0.600 | -0.580 |
| -3.877 | -3.060 | -3.640 | -3.099 |
| -0.952 | -0.375 | -0.714 | -0.418 |
| -0.860 | -0.674 | -1.016 | -0.386 |
| -0.328 | 0.076  | -0.810 | -0.540 |
| -1.245 | -0.629 | -0.871 | -0.671 |
| 0.950  | 1.593  | 0.038  | 2.072  |
| -1.462 | -0.216 | -1.535 | -0.035 |
| -1.606 | -2.032 | -1.412 | -2.244 |
| -0.716 | -0.131 | -0.845 | -0.449 |
| -0.774 | -0.769 | -0.082 | -0.710 |
| 0.071  | 1.003  | 0.220  | 1.359  |
| 2.982  | 1.880  | 2.460  | 2.178  |
| -0.627 | -0.931 | -0.303 | -1.347 |
| -0.467 | -0.464 | -0.242 | -0.298 |

|        |        |        |        |
|--------|--------|--------|--------|
| -0.617 | -1.048 | -1.127 | -1.226 |
| 0.070  | -0.235 | 0.146  | -0.431 |
| 0.573  | 0.127  | -0.024 | -0.006 |
| 2.463  | 1.264  | 2.717  | 2.290  |
| 0.438  | -0.372 | 0.479  | -0.850 |
| 0.193  | 0.501  | 1.188  | 0.824  |
| -0.227 | 0.031  | -0.140 | 0.836  |
| 0.671  | 0.120  | 1.057  | 0.634  |
| 1.567  | -0.058 | 1.432  | -0.438 |
| -1.751 | -1.456 | -1.849 | -1.896 |
| -0.714 | -1.615 | -2.084 | -2.094 |
| 1.789  | 0.221  | 2.657  | -0.704 |
| -1.250 | -1.461 | -1.144 | -1.039 |
| 0.927  | 0.664  | 0.821  | 0.419  |
| -3.329 | -3.699 | -3.427 | -3.038 |
| -3.845 | -2.898 | -3.667 | -4.190 |
| 0.089  | -0.918 | -0.247 | -0.302 |
| 1.619  | 1.544  | 3.130  | 2.183  |
| 0.412  | 0.329  | 0.740  | 0.750  |
| -0.009 | 0.430  | 1.064  | 1.248  |
| 0.662  | 0.578  | 0.197  | 0.044  |
| 0.269  | -0.505 | 0.275  | -1.017 |
| 0.449  | -0.215 | 0.517  | -0.792 |
| -0.112 | -0.804 | 0.688  | -1.512 |
| -0.623 | -2.229 | -0.364 | -2.529 |
| 0.951  | 1.170  | 0.837  | 1.063  |
| -1.247 | -1.528 | -2.009 | -2.381 |
| 0.148  | -0.410 | 0.110  | -1.509 |
| -2.832 | -1.863 | -3.515 | -2.051 |
| 0.027  | -1.746 | -0.340 | -1.491 |
| -1.970 | 0.147  | -1.518 | 0.434  |
| 1.871  | 1.836  | 2.224  | 2.232  |
| -0.827 | -0.470 | -1.980 | -2.272 |
| 2.215  | 0.160  | 1.752  | 0.843  |
| -1.980 | -1.537 | -1.313 | -1.565 |
| 1.191  | 1.184  | 2.013  | 1.045  |
| -0.670 | -0.374 | -0.913 | -0.934 |
| -0.873 | 0.125  | -0.060 | 1.308  |
| 1.115  | -0.135 | 0.264  | -0.350 |
| -0.358 | 0.959  | -0.553 | 1.946  |
| 0.305  | 0.134  | -0.453 | -1.246 |
| -1.596 | -0.341 | -2.840 | -0.144 |
| 0.118  | -0.950 | 1.436  | -1.043 |
| -1.795 | -1.525 | -1.545 | -1.811 |
| -1.312 | -1.366 | -1.016 | -0.937 |
| -0.019 | -0.636 | 0.154  | -1.201 |
| -1.159 | -2.037 | -1.385 | -1.716 |

|        |        |        |        |
|--------|--------|--------|--------|
| -0.342 | -0.359 | -0.701 | -0.211 |
| -1.446 | -1.192 | -1.343 | -2.356 |
| -5.187 | -3.942 | -4.096 | -3.759 |
| 3.661  | 1.876  | 5.288  | 2.450  |
| -1.868 | -1.894 | -2.444 | -2.484 |
| 1.397  | 2.890  | 1.262  | 4.211  |
| 1.659  | 1.863  | 0.827  | 1.518  |
| -0.136 | 0.289  | -0.081 | -0.279 |
| -2.911 | -2.242 | -4.001 | -4.671 |
| 0.547  | -1.295 | 0.440  | -0.694 |
| 1.507  | 1.600  | 1.740  | 1.622  |
| -4.070 | -3.180 | -4.550 | -4.110 |
| -0.510 | 1.356  | 0.344  | 3.175  |
| -0.791 | 0.276  | 0.223  | 0.727  |
| -0.238 | -0.969 | -0.305 | -0.669 |
| 0.310  | -0.669 | -0.234 | -0.488 |
| 1.473  | 0.975  | 2.268  | 0.148  |
| 1.091  | 1.034  | 0.444  | 1.028  |
| 1.930  | 2.996  | 2.689  | 3.333  |
| 0.226  | 0.122  | 0.274  | -0.093 |
| 0.000  | -0.366 | -0.046 | -1.371 |
| 0.000  | -2.222 | -2.596 | -2.994 |
| -2.354 | -2.493 | -2.840 | -4.049 |
| 0.208  | -0.861 | 0.165  | -0.432 |
| -1.496 | -0.596 | -1.818 | -1.142 |
| 0.954  | -0.278 | 1.057  | 0.051  |
| -2.966 | -1.947 | -3.370 | -4.523 |
| -0.011 | -0.097 | 0.830  | -0.089 |
| 1.537  | 1.765  | 2.193  | 2.417  |
| 0.759  | 1.599  | 1.290  | 1.195  |
| 0.493  | 2.063  | 1.398  | 2.828  |
| 3.281  | 2.838  | 3.818  | 4.148  |
| 0.625  | 1.224  | 0.364  | 2.640  |
| 2.561  | 2.362  | 2.278  | 4.046  |
| 0.157  | 0.633  | -0.362 | 0.143  |
| 2.618  | 1.427  | 1.671  | 2.636  |
| -0.641 | -0.793 | -0.461 | -1.073 |
| -1.333 | -1.245 | -1.583 | -3.105 |
| 0.214  | 0.793  | 0.449  | 1.131  |
| 1.311  | 1.188  | 2.326  | 2.133  |
| 0.296  | 0.416  | 0.019  | -0.654 |
| -0.863 | -1.812 | -0.523 | -2.747 |
| -0.832 | -0.332 | -0.591 | 0.238  |
| -2.021 | -1.127 | -2.009 | -1.762 |
| 1.104  | 0.325  | 1.165  | 0.752  |
| 0.508  | 0.657  | 0.596  | 1.116  |
| -2.019 | -1.816 | -0.157 | -1.566 |

|        |        |        |        |
|--------|--------|--------|--------|
| -1.949 | -1.721 | -0.985 | -1.742 |
| 0.778  | 1.404  | 0.994  | 1.304  |
| -2.570 | -2.219 | -3.830 | -3.720 |
| 0.792  | 0.799  | 0.808  | 1.439  |
| -0.751 | 0.947  | 0.605  | 1.687  |
| 1.211  | 1.879  | -0.239 | 2.381  |
| 0.914  | 0.502  | 0.100  | 0.328  |
| -0.446 | -1.181 | -0.282 | -2.439 |
| -3.324 | -2.120 | -3.348 | -2.480 |
| -0.052 | -0.491 | -0.517 | 0.497  |
| -2.069 | -1.368 | -1.108 | -1.336 |
| -0.064 | -0.500 | 0.384  | -0.828 |
| -2.312 | -1.602 | -1.635 | -1.976 |
| -2.175 | -1.546 | -3.028 | -1.720 |
| 1.094  | 0.534  | 1.272  | 1.677  |
| 0.476  | 0.420  | 2.383  | 0.281  |
| -1.100 | 0.534  | -0.529 | 1.211  |
| 3.112  | 0.928  | 2.685  | 0.581  |
| 1.419  | -0.789 | 1.250  | -1.146 |
| -1.073 | -0.505 | -0.468 | -0.098 |
| 0.043  | 1.064  | -0.097 | 1.804  |
| -1.488 | -0.386 | -1.598 | -0.813 |
| -1.600 | -1.284 | -2.367 | -1.734 |
| -1.040 | -0.923 | -0.877 | -1.061 |
| 0.000  | 1.372  | -0.705 | 1.807  |
| -0.293 | 0.023  | -0.544 | -0.781 |
| -1.510 | -0.519 | -1.527 | -0.773 |
| -1.662 | -1.420 | -2.560 | -0.900 |
| -0.970 | -2.665 | -0.596 | -3.878 |
| -1.611 | -1.827 | -1.680 | -0.873 |
| 1.116  | 1.332  | 1.516  | 1.569  |
| -4.454 | -1.780 | -7.703 | -2.827 |
| -7.283 | -4.548 | -9.425 | -5.294 |
| 4.212  | -0.918 | 7.398  | -1.313 |
| 2.762  | 1.458  | 3.817  | 2.321  |
| -0.198 | 0.272  | -0.348 | 0.250  |
| 1.929  | 0.013  | 2.160  | -1.176 |
| -1.274 | -0.695 | -1.176 | -0.506 |
| 0.993  | 0.786  | 1.103  | 0.033  |
| 1.442  | 1.381  | 0.487  | 1.730  |
| 2.072  | 2.941  | 2.212  | 3.876  |
| 0.153  | 0.408  | -0.125 | 0.243  |
| 0.153  | -0.526 | -0.215 | -0.588 |
| -0.082 | -0.528 | -0.467 | -1.005 |
| -2.043 | -1.254 | -2.881 | -1.921 |
| -0.397 | 0.334  | 0.207  | -0.201 |
| -2.946 | -0.770 | -3.683 | -0.382 |

|        |        |        |        |
|--------|--------|--------|--------|
| 1.343  | -0.674 | 0.996  | -1.160 |
| -2.429 | -2.875 | -2.383 | -2.371 |
| -3.134 | -2.407 | -3.818 | -2.028 |
| -1.080 | -1.690 | -1.466 | -1.709 |
| -3.028 | -3.177 | -4.003 | -3.131 |
| 0.846  | -2.569 | 1.694  | -1.862 |
| 1.143  | 0.188  | 1.260  | 1.558  |
| -2.625 | -1.774 | -2.342 | -0.653 |
| -4.156 | -2.656 | -4.191 | -3.415 |
| 0.536  | -0.561 | 2.049  | -2.591 |
| -3.174 | -3.380 | -4.341 | -3.990 |
| 1.313  | 2.148  | 1.791  | 2.247  |
| 4.279  | 3.970  | 4.103  | 4.433  |
| -0.579 | -0.341 | -0.692 | -1.704 |
| 1.058  | 3.286  | 1.491  | 4.798  |
| 1.263  | -0.072 | 1.200  | 0.026  |
| 3.057  | 3.205  | 3.400  | 2.989  |
| 3.461  | 2.733  | 4.647  | 3.424  |
| -2.341 | -0.612 | -1.503 | -0.299 |
| -3.009 | -3.059 | -3.958 | -4.558 |
| 0.797  | 1.389  | 0.262  | 2.258  |
| 6.283  | 4.360  | 5.922  | 4.692  |
| -0.836 | -0.060 | -1.029 | -0.168 |
| -0.755 | -0.753 | -1.969 | 0.208  |
| -0.304 | -2.438 | -1.843 | -3.390 |
| 0.013  | -0.937 | 1.735  | -1.383 |
| -0.228 | 0.221  | -0.658 | 1.774  |
| 1.761  | 1.480  | 1.294  | 1.664  |
| 2.974  | 0.644  | 2.713  | -0.558 |
| 2.428  | 3.101  | 2.771  | 4.039  |
| 1.443  | 0.039  | 1.759  | 1.241  |
| -4.722 | -2.373 | -3.143 | -3.267 |
| 1.647  | 2.183  | 2.006  | 2.320  |
| -0.675 | -0.513 | -1.435 | 0.133  |
| -3.132 | -1.737 | -3.365 | -1.722 |
| 1.092  | 0.060  | 1.160  | 1.662  |
| -1.467 | 0.748  | -1.546 | -0.333 |
| 1.873  | 2.369  | 2.167  | 3.351  |
| 2.332  | 0.983  | 2.870  | 0.385  |
| 1.288  | 1.742  | 2.084  | 2.279  |
| 2.713  | 3.078  | 1.738  | 4.192  |
| 1.648  | 2.771  | 1.656  | 1.803  |
| 2.554  | 1.540  | 1.575  | 1.793  |
| -1.012 | -2.403 | -1.453 | -3.323 |
| -0.056 | 0.480  | -0.522 | 0.412  |
| -0.898 | -0.438 | -0.967 | 0.106  |
| 0.764  | 1.256  | 1.592  | 0.855  |

|        |        |        |        |
|--------|--------|--------|--------|
| -2.070 | -1.358 | -1.420 | -1.582 |
| -3.123 | -1.995 | -3.072 | -0.878 |
| -0.130 | 1.609  | -0.108 | 1.816  |
| 6.170  | 5.677  | 8.093  | 5.502  |
| 0.520  | 0.700  | 1.468  | 0.980  |
| 0.682  | -0.506 | 0.686  | -1.011 |
| 0.307  | 0.006  | -0.021 | -0.161 |
| -2.896 | -3.315 | -2.616 | -4.728 |
| -2.554 | -1.281 | -2.275 | -1.355 |
| -0.312 | -0.173 | -0.305 | -0.010 |
| 0.035  | -0.835 | 0.187  | -0.473 |
| 4.749  | 2.501  | 5.562  | 3.251  |
| 1.087  | 0.820  | 1.039  | 1.389  |
| -1.885 | -1.807 | -2.159 | -1.741 |
| 1.096  | 0.184  | 1.487  | -0.197 |
| -3.632 | -1.463 | -3.443 | -3.020 |
| -1.716 | -0.084 | -1.653 | 0.336  |
| 0.579  | 0.606  | -0.018 | 0.771  |
| 2.430  | 1.997  | 2.951  | 3.269  |
| 1.310  | 1.016  | 1.407  | 2.554  |
| 2.004  | 1.327  | 1.480  | 0.989  |
| 2.626  | 1.654  | 2.055  | 0.693  |
| 0.466  | -0.724 | 0.269  | -1.066 |
| -0.466 | -0.724 | -0.626 | -0.854 |
| 0.720  | 1.103  | 0.981  | 1.399  |
| 2.025  | 2.750  | 1.440  | 2.889  |
| 1.985  | 0.225  | 0.745  | -0.677 |
| -0.477 | 0.225  | -0.590 | 0.177  |
| -1.322 | -0.121 | -2.094 | -0.716 |
| -1.381 | -0.854 | -0.535 | -0.894 |
| 0.605  | 0.985  | 0.820  | 0.872  |
| -0.594 | 1.236  | -0.719 | 1.202  |
| 3.129  | 2.490  | 2.449  | 3.049  |
| 0.546  | 0.904  | -0.204 | 1.882  |
| -0.627 | -0.372 | -0.768 | -0.710 |
| -4.586 | -4.581 | -4.862 | -4.546 |
| -2.483 | -4.008 | -2.062 | -4.224 |
| -0.022 | 0.468  | -0.794 | 0.211  |
| -0.831 | 0.216  | -0.717 | 0.368  |
| -2.243 | -2.840 | -1.714 | -3.493 |
| 1.072  | 1.018  | 1.334  | 1.525  |
| 1.335  | 1.959  | 1.044  | 2.541  |
| -0.903 | -0.763 | -1.113 | -1.487 |
| -2.452 | -0.516 | -1.792 | -0.632 |
| -1.830 | 0.915  | -1.667 | 0.659  |
| 0.679  | 1.183  | 0.503  | 1.251  |
| -0.702 | -0.581 | -1.106 | -1.859 |

|        |        |        |        |
|--------|--------|--------|--------|
| -2.006 | -2.585 | -1.625 | -2.541 |
| 1.902  | 1.413  | 2.480  | 1.634  |
| -0.278 | -0.741 | -0.056 | -0.314 |
| 0.382  | 0.219  | 1.301  | -0.116 |
| 0.908  | 1.423  | 0.808  | 1.750  |
| 0.832  | 0.244  | 1.104  | 0.257  |
| -0.387 | -1.494 | 0.551  | -1.691 |
| -1.723 | -0.594 | -0.944 | 0.603  |
| 1.312  | -0.324 | 1.381  | 0.091  |
| -0.137 | 0.567  | 0.216  | 0.723  |
| 3.312  | 3.139  | 3.365  | 3.504  |
| 0.575  | 1.453  | 2.116  | 2.867  |
| 0.549  | 1.324  | 0.775  | 0.944  |
| 1.598  | 1.199  | 0.407  | 1.658  |
| -1.620 | -0.814 | -1.892 | -0.530 |
| -0.737 | -1.693 | -1.824 | -2.358 |
| 0.221  | -0.674 | -0.935 | -0.825 |
| -3.680 | -3.211 | -4.216 | -3.207 |
| 1.306  | 1.404  | 1.631  | 1.837  |
| -1.397 | -1.284 | -1.686 | -2.578 |
| 2.061  | 1.695  | 2.054  | 1.638  |
| 1.678  | 1.838  | 4.179  | 3.004  |
| 0.582  | -0.094 | 0.509  | 0.113  |
| 0.666  | 0.276  | 1.830  | 0.234  |
| 1.265  | 2.147  | 1.519  | 2.111  |
| -4.990 | -4.207 | -5.490 | -3.542 |
| -6.474 | -5.105 | -7.659 | -4.718 |
| 3.517  | 1.963  | 4.103  | 1.671  |
| 4.125  | 3.024  | 4.846  | 2.932  |
| 1.507  | 1.370  | 2.412  | 1.023  |
| 1.311  | 1.050  | 0.815  | 1.383  |
| -1.564 | -0.750 | -3.099 | -0.245 |
| -1.343 | -0.868 | -2.157 | -0.196 |
| 1.321  | 0.279  | 1.376  | 0.001  |
| 0.977  | 1.394  | 1.957  | 1.666  |
| 1.957  | 2.549  | 2.904  | 1.986  |
| 0.587  | 0.752  | 1.293  | 0.628  |
| -0.405 | -0.101 | -0.542 | -0.245 |
| 1.937  | 0.700  | 1.896  | 0.548  |
| 0.010  | -0.860 | 0.068  | -1.153 |
| -0.157 | 0.021  | 0.416  | -0.187 |
| -0.495 | -1.281 | -0.422 | -1.841 |
| 0.379  | -0.443 | 1.115  | -1.185 |
| 1.139  | 0.427  | 0.697  | 0.748  |
| -0.856 | -0.633 | -0.608 | -0.376 |
| 0.105  | -1.043 | 0.108  | -1.630 |
| 0.355  | 0.656  | 0.550  | 1.160  |

|        |        |        |        |
|--------|--------|--------|--------|
| 0.562  | 1.885  | 1.308  | 1.259  |
| -0.656 | -0.118 | -0.773 | -0.221 |
| 1.575  | 2.020  | 1.624  | 3.474  |
| -0.082 | -0.960 | 0.542  | 0.207  |
| -1.326 | 0.597  | -1.731 | -0.019 |
| -0.188 | 0.205  | -0.226 | -0.177 |
| 2.088  | 0.973  | 2.192  | 0.619  |
| -1.070 | -0.800 | -0.785 | -1.134 |
| 1.335  | 0.925  | 1.803  | 0.727  |
| 1.056  | 0.503  | 1.435  | 0.638  |
| 0.774  | 0.398  | 0.978  | 0.544  |
| 1.136  | 0.560  | 0.777  | -0.402 |
| -0.397 | 0.394  | -0.684 | 0.461  |
| 0.526  | 0.484  | 0.888  | 0.522  |
| -1.094 | 0.193  | -1.228 | 0.238  |
| -1.705 | -0.457 | -0.881 | -1.044 |
| 0.851  | 2.142  | 2.315  | 2.667  |
| -1.259 | -0.907 | -1.520 | -0.855 |
| -1.295 | -1.256 | -0.647 | -1.184 |
| 0.865  | 0.071  | 0.489  | -0.116 |
| -4.490 | -3.008 | -5.007 | -4.291 |
| -0.960 | -0.811 | -1.129 | -0.183 |
| 1.569  | 0.796  | 1.609  | 0.665  |
| -2.429 | -1.448 | -2.535 | -1.379 |
| -0.757 | -1.556 | -0.864 | -1.675 |
| -3.188 | -1.713 | -3.509 | -2.115 |
| -0.239 | 0.702  | -0.272 | 0.975  |
| 2.698  | 2.907  | 3.577  | 3.974  |
| 3.015  | 2.432  | 4.230  | 3.501  |
| -0.269 | 0.036  | -0.533 | 0.068  |
| -0.682 | 0.145  | 0.343  | -0.555 |
| -2.553 | -2.810 | -3.523 | -4.117 |
| -0.716 | -0.694 | -1.742 | 0.184  |
| 0.638  | -1.510 | 0.154  | -2.012 |
| 1.109  | -0.027 | 0.790  | 0.808  |
| 0.077  | -0.027 | 0.331  | -0.169 |
| -1.466 | -1.352 | -1.470 | -1.705 |
| 2.398  | 1.765  | 2.771  | 2.202  |
| 0.164  | -0.407 | -0.118 | -0.870 |
| 0.370  | 0.796  | -0.208 | 1.666  |
| 2.594  | 2.530  | 3.105  | 3.042  |
| -0.680 | -1.345 | -0.668 | -1.900 |
| -0.910 | -0.390 | -1.043 | -0.697 |
| -0.065 | -0.909 | -0.108 | -1.265 |
| -0.431 | 0.684  | 0.556  | 0.975  |
| 0.130  | 1.221  | -0.189 | 1.080  |
| -0.411 | -0.334 | -0.729 | -0.611 |

|        |        |        |        |
|--------|--------|--------|--------|
| 0.357  | 0.778  | -0.019 | -0.669 |
| 0.065  | -1.210 | 0.400  | -2.493 |
| -0.389 | -0.374 | -0.853 | -1.864 |
| -1.539 | -0.850 | -1.881 | -1.133 |
| 0.811  | 0.124  | 0.914  | -0.015 |
| 0.457  | 0.608  | 0.158  | 0.935  |
| -3.010 | -3.211 | -4.620 | -3.468 |
| 0.179  | -0.478 | 0.138  | -0.232 |
| -1.907 | 0.050  | -2.733 | -0.583 |
| 0.963  | 0.522  | 2.338  | -0.034 |
| -0.668 | -1.035 | -0.424 | -0.534 |
| 1.387  | 1.719  | 2.274  | 2.169  |
| 0.914  | 1.468  | 1.686  | 2.393  |
| -0.892 | 0.130  | -0.580 | 0.057  |
| -0.179 | 0.486  | -0.089 | 0.344  |
| 0.369  | 0.070  | 1.209  | -0.538 |
| 1.354  | 0.381  | 0.457  | 0.711  |
| -0.830 | -0.500 | -1.043 | -0.659 |
| -0.390 | -0.703 | -0.777 | -1.902 |
| 0.078  | -0.795 | -0.247 | -1.133 |
| 2.130  | 0.567  | 2.642  | 0.656  |
| 0.076  | 0.990  | -0.010 | 0.631  |
| -0.251 | 0.011  | -0.280 | -0.932 |
| -1.022 | -5.978 | -0.443 | -0.088 |
| -2.246 | -3.762 | -3.118 | -2.357 |
| 2.058  | 0.921  | 3.060  | 0.814  |
| 1.614  | 0.000  | 1.700  | 1.972  |
| -1.338 | 0.615  | -2.585 | 0.735  |
| -2.946 | -1.549 | -3.730 | -3.392 |
| -3.812 | -3.755 | -5.267 | -4.774 |
| -2.113 | -1.109 | -2.133 | -2.211 |
| 1.401  | 2.316  | 2.298  | 2.474  |
| 0.617  | 0.195  | 0.956  | -0.185 |
| 1.304  | 0.925  | 1.077  | 0.975  |
| -1.292 | -1.474 | -0.745 | -1.971 |
| 1.630  | 0.979  | 1.206  | 2.796  |
| 1.661  | 0.519  | 2.007  | 1.486  |
| -1.428 | -1.504 | -2.496 | -1.790 |
| 0.786  | -0.699 | 0.315  | -0.169 |
| 1.485  | 0.876  | 2.696  | 1.659  |
| -1.774 | -1.437 | -1.606 | -1.962 |
| -0.301 | 1.675  | -1.229 | 0.652  |
| -0.686 | 0.437  | -0.747 | -0.693 |
| -0.855 | 0.073  | -0.912 | 0.432  |
| 1.540  | 0.922  | 1.757  | 1.636  |
| 0.600  | -0.108 | 0.282  | -0.312 |
| 1.689  | 0.932  | 2.060  | 1.885  |

|        |        |        |        |
|--------|--------|--------|--------|
| 0.710  | 0.190  | 1.166  | 0.661  |
| 0.191  | 0.160  | 0.326  | -0.117 |
| 1.027  | 0.497  | -0.202 | 0.168  |
| 1.159  | 0.277  | 1.510  | -0.357 |
| -0.705 | -0.507 | -0.863 | -0.951 |
| -3.807 | -3.593 | -4.627 | -5.007 |
| -0.587 | -0.117 | -0.827 | -0.649 |
| 0.897  | -0.025 | 0.704  | -0.347 |
| 0.798  | 1.153  | 1.303  | 1.317  |
| 0.159  | 0.254  | 0.535  | 0.275  |
| -1.071 | -0.461 | -1.873 | -1.042 |
| 0.034  | -0.049 | -0.394 | -0.330 |
| 0.480  | 0.030  | 0.723  | 0.205  |
| 2.399  | 2.605  | 2.705  | 2.899  |
| 1.874  | 2.844  | 2.981  | 3.111  |
| 0.076  | -0.167 | -0.493 | -0.663 |
| -0.076 | 1.061  | -0.136 | 1.307  |
| 1.636  | 1.445  | 1.298  | 2.005  |
| -0.452 | 2.176  | -0.887 | 2.517  |
| 0.032  | -0.873 | 0.755  | -1.325 |
| -0.357 | -0.195 | -0.240 | -0.126 |
| 0.981  | 1.458  | 1.006  | 2.215  |
| -2.015 | -0.759 | -1.445 | -0.402 |
| 3.155  | 1.693  | 2.857  | 1.730  |
| 0.950  | 0.639  | 0.848  | 0.909  |
| -0.516 | 0.226  | -0.291 | 0.327  |
| 0.390  | -0.022 | 0.682  | 0.024  |
| -0.908 | -1.541 | -1.336 | -1.265 |
| -0.021 | 0.049  | -0.626 | -0.011 |
| 1.757  | 1.428  | 1.389  | 1.384  |
| 1.941  | 1.157  | 1.857  | 1.639  |
| 0.286  | -0.358 | 0.154  | -0.317 |
| -0.317 | -0.902 | -0.248 | -1.327 |
| -1.775 | -0.476 | -2.427 | -0.426 |
| -1.310 | -1.403 | -0.642 | -1.187 |
| 0.453  | 0.772  | 0.281  | 1.191  |
| 0.451  | 0.847  | 1.091  | 1.016  |
| 0.021  | 0.475  | 0.303  | 0.255  |
| 0.157  | 0.355  | 0.596  | 0.115  |
| -1.897 | 0.337  | -1.552 | 0.346  |
| -0.074 | 0.283  | -0.161 | 0.014  |
| -0.043 | 0.154  | -0.591 | 0.361  |
| 0.287  | 0.096  | 0.313  | -0.186 |
| 0.909  | 1.216  | 1.569  | 1.474  |
| 0.671  | 0.425  | 1.043  | 0.291  |
| -0.031 | -0.173 | -0.145 | -0.294 |
| 1.268  | 0.141  | 1.658  | -0.003 |

|        |        |        |        |
|--------|--------|--------|--------|
| 0.607  | 0.714  | 1.286  | 0.125  |
| -1.312 | -1.539 | -1.680 | -2.056 |
| -0.239 | 1.102  | -0.025 | 1.105  |
| -0.533 | -1.155 | -0.215 | -1.071 |
| 2.606  | 0.474  | 2.532  | 0.415  |
| -1.626 | -1.312 | -1.827 | -1.557 |
| 0.445  | -1.033 | 0.105  | -1.473 |
| -1.404 | -1.742 | -2.127 | -2.016 |
| 0.021  | 0.617  | 0.921  | 1.344  |
| 1.032  | -1.006 | 0.225  | -1.948 |
| -0.666 | -0.027 | -0.241 | 0.295  |
| -0.063 | -1.222 | 0.664  | -1.291 |
| -0.261 | -1.068 | -0.081 | -0.939 |
| -0.989 | -0.790 | -1.070 | -0.897 |
| -2.191 | -1.969 | -2.316 | -2.367 |
| 1.534  | 1.895  | 1.859  | 2.095  |
| 1.552  | 1.492  | 1.688  | 1.535  |
| -0.546 | -1.566 | -0.380 | -1.588 |
| 0.944  | 1.280  | 0.878  | 2.103  |
| 4.100  | 3.182  | 4.422  | 3.353  |
| -0.542 | -1.620 | -0.480 | -1.999 |
| 0.713  | 0.966  | 1.656  | 1.268  |
| 0.040  | 0.409  | 0.096  | 0.448  |
| -0.120 | -0.557 | -0.477 | -0.424 |
| -0.090 | 0.055  | 0.152  | -0.164 |
| -0.281 | -0.033 | 0.170  | -0.182 |
| -2.071 | -0.934 | -2.991 | -0.556 |
| -0.031 | -0.028 | -0.211 | -0.262 |
| -0.329 | -0.288 | -0.236 | 0.140  |
| 0.113  | 0.701  | 0.320  | 0.409  |
| -4.328 | -2.197 | -5.927 | -2.175 |
| 0.525  | -0.152 | 0.205  | -0.010 |
| -0.385 | 0.947  | 0.166  | 0.848  |
| -1.665 | -0.559 | -1.919 | -0.639 |
| -0.678 | 0.258  | -0.678 | 0.333  |
| 0.186  | 0.580  | 0.108  | 0.428  |
| -0.781 | -0.200 | -0.623 | 0.087  |
| 0.759  | 1.296  | 1.122  | 1.384  |
| 1.490  | 1.138  | 2.448  | 1.118  |
| 1.553  | 0.456  | 2.439  | 0.353  |
| 0.815  | 0.303  | 0.873  | 0.234  |
| -1.508 | -1.908 | -1.192 | -2.216 |
| -0.021 | -0.979 | -0.227 | -1.116 |
| 0.086  | 0.167  | 0.949  | 0.179  |
| 0.000  | -0.668 | -0.424 | -0.936 |
| 2.075  | 1.144  | 2.575  | 1.142  |
| 0.157  | -0.604 | 0.036  | -0.799 |

|        |        |        |        |
|--------|--------|--------|--------|
| -0.461 | -0.133 | -1.080 | -0.335 |
| -0.347 | -1.130 | -0.520 | -1.513 |
| -0.116 | 0.483  | -0.009 | 0.670  |
| 0.169  | -0.365 | 0.208  | -0.374 |
| 1.194  | -0.129 | 1.150  | -0.498 |
| -1.479 | -1.354 | -0.961 | -1.632 |
| -2.537 | -2.302 | -2.421 | -2.921 |
| 0.152  | 1.552  | 0.708  | 1.854  |
| -0.054 | -0.190 | -0.149 | -0.061 |
| 0.184  | 0.523  | 0.726  | 0.272  |
| 1.332  | 1.596  | 1.259  | 2.108  |
| 0.107  | 0.948  | 0.186  | 1.270  |
| 0.340  | 0.050  | 0.774  | -0.013 |
| 0.688  | 0.872  | 1.282  | 1.042  |
| 1.195  | 0.711  | 0.467  | 0.883  |
| -0.890 | 0.033  | -0.955 | -0.143 |
| -1.729 | -0.943 | -1.191 | -1.221 |
| 1.011  | 1.507  | 1.518  | 1.786  |
| 0.465  | 0.316  | 0.522  | 0.692  |
| 1.496  | 0.207  | 2.063  | -0.154 |
| 0.332  | -0.687 | 0.445  | -1.048 |
| -0.218 | -0.137 | 0.223  | -0.479 |
| 0.093  | -0.219 | 0.156  | -0.287 |
| -1.704 | -1.604 | -2.211 | -2.052 |
| -0.677 | -1.065 | -2.216 | -1.456 |
| 0.212  | 0.236  | 0.590  | 0.093  |
| 1.680  | 1.252  | 1.611  | 1.003  |
| 1.036  | 0.105  | 0.868  | 0.260  |
| -1.652 | 0.349  | -2.074 | 0.921  |
| -0.452 | -0.443 | -0.886 | -0.288 |
| -1.849 | -0.217 | -1.434 | -0.111 |
| 0.748  | 0.339  | 1.289  | 0.483  |
| 0.711  | -0.830 | -0.764 | -0.598 |
| -0.371 | 0.597  | 0.030  | 0.866  |
| 0.971  | -0.273 | 1.528  | -0.873 |
| -2.888 | -2.810 | -3.780 | -3.080 |
| 0.378  | 0.440  | 0.227  | 0.531  |
| 0.280  | -0.149 | 0.712  | -0.406 |
| -1.876 | -1.922 | -2.087 | -2.275 |
| 0.644  | 0.210  | 0.899  | 0.513  |
| -0.087 | 0.557  | -0.259 | 0.922  |
| 0.781  | 1.099  | 1.583  | 1.391  |
| 0.431  | 0.074  | 0.522  | -0.104 |
| -0.399 | -0.017 | -0.772 | -0.004 |
| -0.054 | 1.159  | -0.604 | 1.069  |
| -0.249 | -0.453 | -0.557 | -0.481 |
| 0.206  | -0.421 | -0.463 | -0.120 |

|        |        |        |        |
|--------|--------|--------|--------|
| -0.607 | 0.199  | -0.075 | -0.037 |
| 0.152  | -0.102 | -1.572 | -0.264 |
| 0.217  | 0.006  | -0.026 | -0.129 |
| -0.772 | -0.737 | -1.087 | -1.147 |
| -0.033 | 0.834  | 0.431  | 1.293  |
| -0.932 | 0.539  | -0.732 | 0.777  |
| 3.007  | 1.961  | 3.699  | 2.059  |
| 0.150  | 0.768  | 1.057  | 0.644  |
| 2.218  | 1.090  | 2.588  | 1.548  |
| 1.246  | 1.787  | 1.257  | 1.989  |
| -1.277 | -0.935 | -1.005 | -0.888 |
| 0.666  | 0.356  | 1.638  | 0.347  |
| 0.187  | -0.086 | -0.077 | -0.092 |
| 0.031  | 0.118  | 0.477  | 0.062  |
| 0.186  | -0.502 | 0.481  | -0.883 |
| 0.021  | 0.657  | -0.869 | 0.955  |
| 0.844  | 1.350  | 0.594  | 1.285  |
| -0.503 | -0.053 | 0.275  | 0.095  |
| 0.391  | 0.201  | 0.117  | 0.211  |
| -1.645 | -0.775 | -1.225 | -0.165 |
| -0.429 | -0.889 | -0.409 | -0.170 |
| 0.136  | -0.135 | -0.357 | -0.699 |
| -0.440 | -0.210 | -0.535 | -0.608 |
| -0.411 | -0.330 | -0.330 | -0.537 |
| 1.923  | 1.366  | 2.340  | 1.259  |
| 0.454  | 0.458  | 0.352  | 0.474  |
| -1.505 | -0.887 | -1.895 | -0.824 |
| 0.626  | -0.895 | 0.125  | -1.433 |
| -0.657 | -1.127 | -1.924 | -1.240 |
| 0.916  | 0.579  | 2.078  | 0.820  |
| -0.707 | -1.464 | -0.926 | -1.657 |
| 1.090  | 1.980  | 1.940  | 2.650  |
| 0.227  | -0.211 | 0.215  | -0.090 |
| -0.330 | -0.283 | -0.209 | -0.326 |
| 0.474  | 0.964  | 0.464  | 0.893  |
| 0.185  | 0.425  | 0.660  | 0.605  |
| -0.391 | 0.391  | 0.360  | 0.746  |
| 0.883  | 0.709  | 0.699  | 1.138  |
| 0.946  | 0.756  | 0.928  | 0.446  |
| 0.766  | 1.027  | -0.174 | 1.352  |
| 0.501  | 0.722  | 0.268  | 0.771  |
| -0.954 | -0.681 | -0.787 | -0.697 |
| 0.804  | 0.670  | 0.778  | 1.001  |
| 0.668  | 0.661  | 0.696  | 1.204  |
| -0.939 | 0.026  | -0.932 | 0.290  |
| -1.222 | -0.516 | -0.817 | -0.407 |
| 0.527  | 0.931  | 0.506  | 0.986  |

|        |        |        |        |
|--------|--------|--------|--------|
| -0.669 | -0.781 | -0.993 | -1.168 |
| -0.387 | -0.331 | 0.459  | -0.660 |
| -0.225 | -0.067 | -0.248 | 0.015  |
| -0.853 | -1.514 | -1.428 | -1.830 |
| 0.494  | -0.184 | -0.170 | -0.287 |
| -0.505 | -0.528 | -0.784 | -0.425 |
| -1.132 | -0.053 | -0.317 | -0.066 |
| -0.440 | 0.222  | -0.333 | 0.130  |
| -0.357 | 0.412  | 0.407  | 0.661  |
| 0.347  | -0.979 | -0.282 | -1.360 |
| 0.690  | 1.053  | 0.501  | 1.293  |
| -0.921 | -0.279 | -0.903 | -0.204 |
| -1.387 | -0.891 | -2.230 | -1.126 |
| -1.753 | -0.550 | -1.538 | -0.492 |
| -0.022 | 0.171  | -0.078 | 0.150  |
| 0.918  | -0.134 | 1.319  | -0.387 |
| -1.517 | -0.123 | -0.944 | 0.254  |
| 0.218  | 0.465  | 0.819  | 0.807  |
| 1.578  | 0.734  | 1.542  | 0.633  |
| -0.268 | 0.386  | 0.154  | 0.597  |
| -0.388 | -0.571 | -0.263 | -0.653 |
| 0.086  | 0.117  | -0.345 | -0.003 |
| 1.753  | 1.117  | 2.109  | 1.369  |
| 0.571  | 0.183  | 1.028  | 0.223  |
| 1.111  | 0.553  | 1.026  | 0.539  |
| 1.448  | 1.081  | 1.544  | 1.102  |
| 0.185  | -0.418 | 0.716  | -0.235 |
| -1.936 | -1.936 | -1.790 | -2.295 |
| -0.220 | -0.079 | -0.424 | -0.293 |
| -0.388 | 0.311  | -0.140 | 0.267  |
| -1.164 | -0.728 | -1.327 | -0.606 |
| 0.053  | -0.138 | -0.307 | -0.494 |
| -0.405 | 0.101  | -0.501 | -0.335 |
| -1.560 | -1.306 | -1.435 | -1.368 |
| -0.261 | -1.471 | -1.104 | -1.554 |
| -0.196 | 0.005  | 0.502  | 0.198  |
| 1.224  | 1.508  | 1.694  | 1.929  |
| -0.248 | -0.285 | -0.893 | -0.723 |
| 1.158  | 0.713  | 1.105  | 1.052  |
| 0.277  | -0.219 | 0.282  | -0.411 |
| -1.037 | -0.488 | -1.144 | -0.565 |
| -0.334 | 1.309  | 0.488  | 2.070  |
| 0.258  | 0.074  | 0.747  | 0.254  |
| 1.282  | 1.003  | 0.341  | 1.047  |
| -0.639 | -0.474 | -0.825 | -1.005 |
| -0.622 | -0.322 | -1.064 | -0.470 |
| -1.593 | -0.856 | -1.203 | -0.740 |

|        |        |        |        |
|--------|--------|--------|--------|
| 0.316  | -1.036 | 0.417  | -1.420 |
| -1.360 | -0.660 | -0.073 | -0.579 |
| 1.631  | 0.774  | 2.390  | 0.837  |
| 1.562  | 1.269  | 2.863  | 1.421  |
| -0.515 | -0.213 | 0.910  | 0.149  |
| 0.952  | 1.061  | 1.559  | 1.078  |
| 2.440  | 1.477  | 0.065  | 1.692  |
| -0.971 | -0.213 | -1.347 | -0.178 |
| 0.366  | -0.026 | 1.125  | -0.411 |
| 1.029  | 0.375  | 1.610  | 0.028  |
| 0.403  | -0.505 | 0.409  | -1.027 |
| 0.000  | 0.094  | -0.915 | -0.063 |
| -0.776 | -0.167 | -1.910 | -0.222 |
| 0.580  | -0.037 | 1.690  | 0.108  |
| -0.289 | -0.634 | -0.103 | -0.923 |
| -0.155 | -2.610 | -3.181 | -2.052 |
| -1.399 | -0.704 | -1.278 | -0.506 |
| 0.147  | -0.016 | 0.038  | 0.554  |
| 0.335  | 0.979  | 0.231  | 1.276  |
| -1.115 | -0.448 | -2.300 | -1.137 |
| 1.210  | 1.086  | 1.398  | 1.744  |
| 1.649  | 0.624  | 1.483  | 0.582  |
| 2.116  | 0.572  | 0.935  | 0.587  |
| 4.422  | 2.716  | 5.817  | 3.063  |
| -2.103 | 0.195  | 0.368  | -0.008 |
| 1.135  | 1.133  | 0.766  | 1.744  |
| 0.359  | 0.456  | 0.478  | 1.007  |
| 0.676  | -0.147 | 0.804  | -0.060 |
| 0.423  | 0.500  | 0.393  | 0.290  |
| 2.256  | 1.974  | 2.608  | 2.449  |
| 0.000  | 0.374  | 0.008  | 0.267  |
| 1.331  | 0.945  | 0.953  | 1.018  |
| -1.547 | 0.161  | -0.367 | 0.765  |
| -0.028 | -0.400 | 0.209  | -0.170 |
| -0.019 | 0.657  | 0.262  | 0.473  |
| 1.158  | 0.523  | 0.231  | 0.294  |
| -0.158 | -0.014 | -0.467 | -0.573 |
| -0.102 | -0.101 | 0.447  | -0.546 |
| -0.457 | 0.650  | -1.101 | 0.371  |
| 0.112  | 0.335  | -1.025 | -0.133 |
| 0.345  | 0.696  | 0.635  | 1.531  |
| 1.909  | 1.822  | 2.882  | 1.686  |
| 0.873  | 0.484  | 0.876  | 0.464  |
| 0.244  | 0.028  | 1.224  | -0.367 |
| -1.365 | -0.288 | -1.058 | -0.355 |
| 1.337  | 0.626  | 1.670  | 0.954  |
| 1.025  | 0.540  | 1.475  | 0.873  |

|        |        |        |        |
|--------|--------|--------|--------|
| 1.068  | 1.616  | 1.442  | 2.172  |
| 1.842  | 0.447  | 1.209  | -0.055 |
| -0.873 | -0.887 | -0.790 | -0.849 |
| -1.049 | -1.993 | -2.621 | -2.772 |
| -1.230 | -1.284 | -2.518 | -2.216 |
| 0.884  | 0.239  | 0.733  | 0.464  |
| 0.629  | 0.435  | -0.290 | 0.058  |
| -2.595 | -2.199 | -2.952 | -3.343 |
| -2.301 | -2.478 | -2.765 | -3.275 |
| -1.816 | -1.369 | -1.348 | -1.406 |
| 2.121  | 0.662  | 2.203  | 0.256  |
| -2.018 | -1.374 | -1.841 | -1.523 |
| -0.881 | -0.797 | -0.940 | -0.873 |
| 1.474  | 1.613  | 2.226  | 2.699  |
| 1.119  | 1.138  | 1.503  | 1.562  |
| 1.783  | 2.691  | 2.456  | 3.617  |
| 2.945  | 2.880  | 5.388  | 2.988  |
| -0.018 | -0.870 | -0.318 | -1.275 |
| -1.849 | -1.350 | -3.403 | -2.027 |
| 0.772  | 1.008  | 2.478  | 0.796  |
| -0.655 | -0.635 | -0.829 | -0.917 |
| 1.811  | 1.280  | 1.780  | 1.281  |
| -0.195 | 0.084  | -0.680 | 0.496  |
| -0.062 | -0.326 | -0.521 | -0.820 |
| -0.765 | -1.534 | -1.757 | -2.169 |
| -2.240 | -1.039 | -1.214 | -0.965 |
| -0.964 | -0.533 | -1.119 | -0.740 |
| 0.808  | 1.144  | 1.732  | 1.460  |
| 1.606  | 1.700  | 3.040  | 2.010  |
| -1.351 | -0.856 | -0.970 | -1.198 |
| 0.945  | 0.009  | -0.632 | -0.473 |
| 0.649  | 0.790  | 1.315  | 1.324  |
| -0.441 | 0.574  | -0.206 | 0.575  |
| -1.143 | 0.488  | 0.168  | 0.300  |
| -1.332 | -0.679 | -1.383 | -0.702 |
| -1.284 | -0.933 | -1.696 | -1.265 |
| -0.837 | -0.652 | -1.409 | -0.482 |
| -0.549 | -0.685 | -0.470 | -1.012 |
| 1.237  | -0.622 | 1.585  | -0.602 |
| 0.328  | 0.894  | 0.374  | 1.548  |
| -0.112 | -1.236 | -1.850 | -1.999 |
| 0.430  | 0.241  | -0.560 | 0.034  |
| 0.808  | 0.843  | 0.766  | 1.196  |
| -0.148 | -0.444 | -0.322 | -0.538 |
| -1.907 | -3.226 | -4.185 | -3.840 |
| 0.752  | 1.667  | 0.234  | 1.832  |
| 0.094  | -0.015 | -0.021 | -0.107 |

|        |        |        |        |
|--------|--------|--------|--------|
| -0.959 | -0.649 | -0.547 | -0.367 |
| -1.562 | -1.172 | -1.284 | -1.331 |
| 1.183  | 0.824  | 1.524  | 1.169  |
| -0.123 | -0.665 | -0.787 | -0.782 |
| -0.200 | -0.327 | -0.008 | -0.111 |
| 0.702  | 1.614  | 1.010  | 2.257  |
| -0.892 | 0.288  | -1.021 | 0.720  |
| -0.229 | -0.200 | 1.023  | -0.217 |
| -0.316 | -0.186 | -1.217 | -0.012 |
| 0.010  | -0.411 | 0.493  | -0.413 |
| 1.162  | 1.045  | 1.031  | 0.963  |
| 1.542  | 1.962  | 2.084  | 2.362  |
| -0.524 | -0.024 | -0.187 | 0.059  |
| -0.734 | -0.885 | -1.255 | -1.155 |
| -0.521 | -0.942 | -1.818 | -1.192 |
| -0.791 | -0.369 | -1.340 | -0.265 |
| -1.485 | -1.689 | -2.430 | -2.081 |
| 0.986  | 1.333  | 1.462  | 1.434  |
| 0.642  | 0.434  | 0.715  | 0.268  |
| 0.220  | 0.490  | 0.560  | 0.346  |
| -1.103 | -0.822 | -1.262 | -1.014 |
| -0.290 | 0.453  | -0.407 | 0.959  |
| -0.913 | -0.879 | -2.698 | -0.579 |
| 0.322  | 1.058  | 2.043  | 1.303  |
| 0.930  | -0.005 | 0.524  | 0.554  |
| -2.153 | -0.345 | -0.974 | 0.022  |
| 1.038  | 0.708  | 0.622  | 1.192  |
| -0.215 | 0.347  | 2.015  | 0.654  |
| 1.829  | 1.273  | 1.967  | 1.547  |
| -0.500 | -0.152 | 0.037  | 0.169  |
| -3.342 | -2.269 | -4.906 | -2.615 |
| 1.277  | 1.542  | 2.725  | 1.990  |
| -1.627 | -0.486 | -2.189 | -0.267 |
| -2.092 | -0.823 | -2.100 | -0.507 |
| -0.810 | -0.473 | -0.869 | -0.388 |
| 2.611  | 0.948  | 2.744  | 0.873  |
| -1.669 | -1.811 | -1.467 | -1.933 |
| -0.276 | -0.578 | 0.442  | -0.328 |
| 0.367  | -1.392 | 0.310  | -2.063 |
| -2.204 | -1.616 | -2.966 | -1.863 |
| -0.313 | 0.885  | -0.652 | 1.727  |
| 0.209  | 0.253  | -0.014 | 0.371  |
| 1.202  | 0.860  | 2.791  | 0.898  |
| 1.127  | 1.323  | 2.165  | 1.366  |
| -2.381 | -1.003 | -2.525 | -1.047 |
| 0.219  | 1.244  | 0.906  | 1.285  |
| -0.700 | -0.936 | -1.291 | -1.308 |

|        |        |        |        |
|--------|--------|--------|--------|
| -1.372 | -1.302 | -2.344 | -1.455 |
| -0.298 | -0.520 | -0.424 | -0.277 |
| -0.717 | 0.000  | -0.467 | 0.210  |
| -0.603 | 0.349  | 0.235  | 0.086  |
| -0.141 | -0.258 | -0.526 | -0.346 |
| -1.669 | -2.958 | -2.720 | -3.392 |
| -2.258 | -0.837 | -2.424 | -0.591 |
| -2.103 | -2.066 | -2.629 | -2.033 |
| 0.367  | 0.439  | 2.094  | 0.171  |
| -0.115 | -0.439 | -0.557 | -0.588 |
| 1.490  | 1.602  | 2.653  | 1.946  |
| -1.834 | -1.270 | -2.507 | -2.037 |
| -0.311 | -0.171 | -1.089 | 0.045  |
| -1.710 | -0.845 | -1.724 | -0.900 |
| -0.990 | -0.325 | 0.003  | -0.464 |
| 3.539  | 2.426  | 5.078  | 3.123  |
| -0.896 | -1.305 | -1.706 | -1.554 |
| 1.341  | 0.604  | 2.060  | 0.833  |
| 1.166  | 0.965  | 0.951  | 1.287  |
| 0.045  | 0.379  | 0.370  | 0.468  |
| 2.082  | 1.678  | 2.967  | 2.069  |
| -0.564 | -0.425 | -0.498 | -0.500 |
| -1.597 | -2.045 | -1.743 | -2.735 |
| 0.360  | 0.148  | 0.469  | 0.177  |
| -0.664 | -0.520 | -0.634 | -0.916 |
| -0.965 | -1.037 | -1.452 | -0.982 |
| 1.235  | 0.488  | 1.523  | 0.948  |
| -0.023 | -0.064 | -0.430 | 0.092  |
| -1.934 | -1.515 | -1.641 | -1.728 |
| 1.346  | 1.102  | 1.810  | 1.043  |
| -1.231 | -0.533 | -1.370 | -0.842 |
| 1.672  | 1.623  | 2.191  | 1.855  |
| 0.293  | 0.027  | -0.590 | -0.010 |
| 1.230  | 0.694  | 0.660  | 0.630  |
| 1.127  | 0.673  | 1.340  | 0.527  |
| 0.973  | 0.679  | 0.235  | 0.224  |
| 0.974  | 0.700  | 0.407  | 1.013  |
| -0.790 | -1.468 | -0.439 | -1.883 |
| -2.574 | -1.384 | -3.519 | -1.765 |
| 1.581  | 1.011  | 2.056  | 0.807  |
| -1.436 | -1.032 | -1.536 | -0.877 |
| 2.081  | 0.642  | 2.203  | 0.439  |
| -1.471 | -0.679 | -0.409 | -0.730 |
| -1.202 | -0.229 | -1.392 | -0.218 |
| -3.566 | -2.512 | -4.197 | -2.763 |
| -2.229 | -1.455 | -2.186 | -1.407 |
| 0.839  | -0.417 | 0.357  | -1.028 |

|        |        |        |        |
|--------|--------|--------|--------|
| -4.474 | -4.689 | -7.192 | -6.424 |
| 1.113  | 0.919  | 1.974  | 0.895  |
| -1.199 | -0.127 | -1.288 | -0.022 |
| 1.454  | 0.503  | 1.831  | 1.094  |
| 2.149  | 1.823  | 3.156  | 2.430  |
| 1.227  | 1.104  | 2.371  | 1.375  |
| 0.690  | -0.241 | 0.518  | -0.862 |
| 0.697  | 1.266  | 1.443  | 2.290  |
| 1.629  | 1.245  | 2.358  | 1.576  |
| 0.884  | 0.845  | 0.514  | 0.250  |
| -2.571 | -0.911 | -2.318 | -0.987 |
| -6.381 | -2.957 | -5.447 | -3.188 |
| 1.019  | -0.668 | 0.386  | -0.468 |
| -6.823 | -4.075 | -6.553 | -4.692 |
| -1.052 | -1.670 | -3.171 | -1.616 |
| 0.277  | -0.102 | 0.915  | -0.113 |
| 1.400  | 0.295  | 2.512  | 0.201  |
| -1.019 | -0.856 | -1.404 | -0.872 |
| -0.474 | -0.504 | -0.323 | -0.017 |
| 0.290  | 0.461  | -0.003 | 1.663  |
| 1.773  | 0.989  | 2.770  | 1.296  |
| -0.336 | 0.299  | -0.573 | -0.336 |
| -0.964 | -0.335 | -0.919 | 0.664  |
| 1.003  | 0.938  | 0.486  | 1.066  |
| 0.877  | 1.094  | 1.566  | 1.961  |
| 1.921  | 1.210  | 1.773  | 1.642  |
| 1.575  | 1.046  | 2.108  | 1.019  |
| 0.581  | 0.298  | 0.500  | -0.014 |
| -0.917 | 0.423  | -1.783 | 0.332  |
| 0.793  | 0.490  | 1.156  | -0.495 |
| 0.824  | -0.398 | 0.197  | -0.801 |
| -1.580 | -0.446 | -1.547 | -0.109 |
| -0.100 | -0.040 | -0.095 | 0.656  |
| -1.190 | -0.552 | -2.045 | -0.438 |
| -0.227 | -0.271 | -1.113 | 0.109  |
| -2.883 | -1.537 | -3.601 | -1.840 |
| -0.273 | -1.489 | -1.117 | -1.816 |
| -0.864 | -1.216 | -0.997 | -0.990 |
| 0.538  | 0.553  | 0.544  | 0.146  |
| -0.498 | -0.927 | -1.540 | -1.662 |
| -1.390 | -0.443 | -0.922 | 0.579  |
| 2.423  | 1.831  | 4.977  | 2.274  |
| -0.915 | -0.233 | -1.828 | -0.363 |
| 2.758  | 1.843  | 3.369  | 1.734  |
| -0.217 | -0.908 | -1.621 | -1.314 |
| -1.405 | -1.282 | -1.776 | -1.532 |
| -1.044 | -0.120 | -0.580 | -0.368 |

|        |        |        |        |
|--------|--------|--------|--------|
| 0.927  | 0.324  | 1.618  | -0.229 |
| -1.836 | -1.752 | -3.556 | -2.164 |
| -0.544 | -1.498 | -1.127 | -2.045 |
| 0.398  | -0.360 | 1.072  | -0.886 |
| -1.711 | -0.367 | -2.417 | 0.036  |
| 1.976  | 0.156  | 1.212  | -0.995 |
| -0.716 | -0.800 | -1.567 | -0.663 |
| 0.677  | 0.874  | 1.916  | 2.145  |
| 2.585  | 2.360  | 4.911  | 3.099  |
| 1.281  | 1.243  | 2.785  | 1.193  |
| 2.327  | 1.020  | 2.935  | 0.809  |
| -0.937 | -0.643 | -0.706 | -0.992 |
| 2.197  | 1.436  | 2.382  | 1.718  |
| -0.838 | -0.644 | -2.106 | -0.999 |
| -1.083 | -2.303 | -2.593 | -3.290 |
| -3.088 | -2.481 | -3.536 | -3.078 |
| -0.336 | -0.205 | -0.530 | -0.504 |
| 0.052  | 0.143  | 1.075  | 0.680  |
| 1.312  | 1.157  | 1.489  | 1.679  |
| 1.257  | 1.223  | 1.451  | 1.204  |
| 0.792  | 0.612  | 1.477  | 0.515  |
| -2.330 | -1.921 | -3.589 | -2.662 |
| 1.349  | 1.509  | 1.898  | 2.858  |
| 0.152  | -1.589 | -0.048 | -2.286 |
| 0.804  | 0.792  | 2.561  | 1.555  |
| -0.590 | -1.008 | -0.865 | -1.477 |
| -0.151 | 0.701  | 0.978  | 0.691  |
| 1.651  | 1.267  | 2.059  | 1.369  |
| -2.882 | -2.086 | -3.927 | -2.327 |
| 2.047  | 2.611  | 3.667  | 3.810  |
| 0.424  | -0.525 | 0.686  | -0.727 |
| -3.228 | -4.210 | -6.870 | -5.309 |
| 0.180  | 1.211  | 1.325  | 1.885  |
| -3.502 | -2.208 | -4.510 | -2.831 |
| 1.439  | 0.927  | 1.977  | 1.163  |
| 2.140  | 2.021  | 2.858  | 2.551  |
| -0.244 | -0.298 | -0.672 | -0.474 |
| -2.145 | -1.231 | -2.141 | -2.091 |
| 0.263  | -0.618 | 0.028  | -1.005 |
| 0.562  | -0.095 | 0.028  | 0.448  |
| 1.706  | 0.038  | 2.009  | -0.682 |
| -0.643 | -0.540 | -1.330 | -0.516 |
| -1.560 | -0.453 | -1.006 | -0.251 |
| 0.118  | 0.166  | 0.302  | 0.449  |
| 0.118  | 0.083  | 0.035  | 0.149  |
| -0.445 | 0.699  | -0.450 | 0.367  |
| 1.963  | 0.807  | 2.452  | 1.304  |

|        |        |        |        |
|--------|--------|--------|--------|
| 0.603  | 0.282  | 0.323  | 0.089  |
| -2.435 | -0.673 | -2.779 | -0.929 |
| 1.095  | 0.384  | 1.397  | 0.986  |
| 2.775  | 2.384  | 3.871  | 3.512  |
| 0.516  | 0.098  | 0.401  | 0.169  |
| -0.794 | -0.252 | -0.837 | -0.035 |
| 1.319  | 1.561  | 2.617  | 2.381  |
| 1.302  | 0.759  | 1.094  | 0.402  |
| 0.981  | 0.288  | 0.610  | 0.195  |
| 0.256  | -0.150 | 0.113  | -0.197 |
| 0.231  | 0.359  | 0.385  | -0.136 |
| 0.617  | 1.158  | 1.086  | 1.580  |
| -2.393 | -0.669 | -1.426 | -1.329 |
| -0.025 | -0.393 | 0.302  | -0.685 |
| -0.334 | -0.461 | -0.099 | -0.871 |
| 1.000  | 0.461  | -0.006 | 0.192  |
| -0.172 | 0.642  | 0.642  | 0.896  |
| 0.576  | 2.373  | 1.505  | 2.949  |
| -0.897 | -0.110 | -1.652 | -0.710 |
| 0.909  | 1.427  | 1.831  | 1.707  |
| -0.073 | 0.683  | -0.891 | 0.623  |
| 2.680  | 1.984  | 3.008  | 3.207  |
| 0.083  | -0.273 | -1.253 | -0.720 |
| -1.741 | -0.509 | -1.780 | -1.029 |
| 1.048  | 0.710  | 1.478  | 0.399  |
| -0.336 | 0.367  | 0.003  | 0.094  |
| -1.784 | -1.082 | -2.725 | -2.448 |
| -0.540 | -1.202 | -1.114 | -1.550 |
| -0.791 | -0.478 | -1.041 | -0.905 |
| 0.975  | 1.162  | 1.067  | 1.078  |
| -0.505 | 0.023  | -1.346 | 0.090  |
| -1.719 | -0.645 | -2.219 | -0.943 |
| 0.888  | 0.577  | 0.682  | 1.387  |
| 0.435  | 1.133  | 1.017  | 1.290  |
| 1.171  | 1.774  | 2.082  | 2.167  |
| -0.209 | -0.516 | -0.443 | -0.564 |
| 0.795  | 1.046  | 0.907  | 1.513  |
| 0.583  | -0.022 | 1.103  | 0.617  |
| 0.012  | 0.005  | 0.099  | 0.045  |
| -0.133 | -1.063 | -0.676 | -0.888 |
| -2.145 | -1.678 | -0.948 | -1.677 |
| -0.609 | -0.963 | -1.273 | -1.272 |
| -0.212 | -0.051 | -0.134 | -0.920 |
| -0.463 | -0.283 | 0.186  | -0.175 |
| -0.592 | -0.324 | 0.284  | -0.470 |
| -1.488 | -0.171 | -2.715 | -1.236 |
| 0.893  | -0.246 | -0.248 | -0.720 |

|        |        |        |        |
|--------|--------|--------|--------|
| -0.076 | 0.177  | 0.746  | 0.252  |
| 0.570  | 0.524  | 0.548  | 1.225  |
| -0.825 | -0.244 | -0.612 | 0.039  |
| -0.652 | -1.041 | -0.884 | -1.488 |
| 1.779  | 0.711  | 1.429  | 0.906  |
| 0.703  | 0.171  | 1.068  | 0.247  |
| -0.100 | -0.023 | -0.352 | 0.007  |
| -0.175 | 0.262  | -0.850 | 0.072  |
| 0.961  | 0.216  | 0.968  | 0.578  |
| -2.135 | -1.354 | -1.381 | -1.803 |
| -0.547 | -0.288 | -0.411 | -0.086 |
| -0.602 | 0.334  | -0.520 | 0.858  |
| -0.747 | -0.947 | -0.543 | -1.083 |
| -0.701 | -0.326 | -0.512 | -1.104 |
| 1.743  | 1.376  | 2.485  | 2.036  |
| 2.752  | 2.232  | 3.305  | 2.105  |
| -0.625 | -0.056 | -0.589 | -0.198 |
| 1.221  | 0.795  | 2.032  | 1.243  |
| -0.310 | 0.306  | 0.278  | 0.326  |
| 0.161  | 0.427  | 0.560  | 0.684  |
| 0.037  | -0.066 | -0.179 | 0.189  |
| 0.568  | 0.183  | 0.935  | 0.301  |
| 1.468  | 0.171  | 2.211  | 0.602  |
| -0.890 | -0.359 | -1.019 | -0.889 |
| 0.781  | 0.392  | 0.604  | 0.414  |
| -0.341 | -0.099 | -0.918 | -0.209 |
| 0.487  | 0.166  | 0.967  | 0.094  |
| 0.702  | 0.813  | 1.275  | 1.159  |
| 0.133  | -0.488 | -0.118 | -0.634 |
| -0.567 | -0.568 | -0.834 | -0.882 |
| -0.558 | -0.593 | -0.648 | -0.727 |
| -1.509 | -0.563 | -1.309 | -0.996 |
| -0.434 | -0.786 | -0.395 | -1.131 |
| 1.160  | 0.724  | 1.375  | 1.044  |
| -0.776 | -0.848 | -0.441 | -1.232 |
| -0.570 | 0.180  | -0.502 | -0.338 |
| -0.199 | -0.848 | -0.215 | -0.955 |
| -0.550 | -0.724 | -0.581 | -1.111 |
| 2.194  | 1.381  | 2.262  | 1.815  |
| -0.565 | -2.000 | -2.012 | -1.553 |
| -0.482 | -0.734 | -0.718 | -1.259 |
| 0.457  | 0.255  | 0.796  | 0.617  |
| -2.611 | -1.668 | -3.563 | -1.782 |
| 1.345  | 1.059  | 2.503  | 1.268  |
| -1.193 | -1.200 | -1.394 | -1.079 |
| -0.393 | 0.587  | 0.303  | 0.484  |
| 0.177  | -0.381 | -0.499 | -0.194 |

|        |        |        |        |
|--------|--------|--------|--------|
| -0.076 | 0.492  | 0.546  | 1.078  |
| -1.520 | -1.342 | -2.788 | -1.529 |
| -1.165 | -0.024 | -0.826 | 0.085  |
| -0.182 | -0.499 | -0.693 | -0.632 |
| 0.208  | -2.120 | -0.417 | -2.376 |
| -1.535 | -1.874 | -2.949 | -2.738 |
| 0.593  | 0.136  | 0.337  | -0.357 |
| -1.323 | -0.019 | -3.205 | -1.400 |
| 0.346  | 0.470  | 1.984  | 0.549  |
| 1.135  | 0.664  | 2.428  | 1.368  |
| 1.316  | 0.458  | 1.460  | 1.256  |
| 1.286  | 2.070  | 2.085  | 3.076  |
| -1.650 | -0.653 | -2.389 | -0.756 |
| -0.156 | -0.669 | -0.635 | -1.019 |
| -0.326 | -0.182 | -0.969 | 0.006  |
| 1.593  | 1.061  | 2.278  | 1.153  |
| 0.819  | 0.854  | 1.986  | 0.416  |
| 1.380  | 0.988  | 0.786  | 1.102  |
| -0.706 | -0.721 | -1.224 | -0.320 |
| -0.470 | -0.214 | -0.776 | 0.254  |
| 0.127  | 0.053  | 0.155  | -0.154 |
| 0.013  | 0.273  | -0.333 | -0.152 |
| 2.409  | 2.110  | 3.170  | 2.375  |
| -0.261 | 0.295  | -0.051 | 0.167  |
| 1.701  | 2.479  | 2.382  | 4.048  |
| 0.049  | 0.197  | -0.210 | 0.431  |
| -0.982 | 0.247  | -1.180 | 0.137  |
| 0.468  | -0.479 | -0.509 | -0.393 |
| -0.455 | 0.355  | 0.480  | 0.247  |
| 0.123  | -0.096 | 0.187  | -0.071 |
| 0.222  | 0.902  | 0.509  | 0.956  |
| 0.184  | -0.050 | 0.810  | 0.065  |
| -0.665 | -0.841 | -1.075 | -0.868 |
| -0.136 | 0.101  | -0.006 | 0.126  |
| -1.621 | -0.892 | -1.033 | -0.649 |
| 0.426  | 0.198  | 0.462  | 0.254  |
| -1.120 | -1.305 | -1.589 | -1.405 |
| 1.844  | 1.943  | 2.277  | 2.224  |
| 0.471  | 0.169  | 0.520  | 0.322  |
| -0.782 | 0.118  | -0.982 | 0.147  |
| 1.313  | 0.799  | 1.680  | 1.026  |
| 0.638  | 0.898  | 0.888  | 0.813  |
| -0.995 | -0.448 | -1.784 | -0.541 |
| 0.897  | 1.135  | 1.142  | 1.260  |
| 0.269  | 1.209  | 0.385  | 1.056  |
| 0.244  | 0.060  | 0.102  | 0.212  |
| -0.158 | -0.673 | 0.087  | -0.819 |

|        |        |        |        |
|--------|--------|--------|--------|
| -0.722 | -0.114 | -0.462 | -0.169 |
| -1.672 | -1.677 | -1.604 | -1.744 |
| -1.333 | -1.250 | -2.097 | -1.470 |
| 1.195  | 0.470  | 1.403  | 0.477  |
| -0.288 | -0.235 | -0.869 | -0.533 |
| -0.844 | -0.134 | -0.902 | -0.434 |
| -2.471 | -1.105 | -1.484 | -1.197 |
| -1.568 | -1.600 | -3.025 | -1.732 |
| -1.821 | -0.671 | -3.343 | -1.108 |
| 0.442  | 0.590  | 0.094  | 0.521  |
| -0.791 | 1.369  | -0.797 | 1.312  |
| -0.108 | -0.176 | 0.014  | -0.042 |
| -0.744 | -1.504 | -1.245 | -1.913 |
| -1.092 | 0.669  | -1.124 | 0.800  |
| 0.274  | -0.046 | 0.959  | -0.019 |
| -2.593 | -2.580 | -3.919 | -3.027 |
| 0.252  | 0.224  | 1.275  | 0.378  |
| 0.126  | -0.661 | 0.268  | -0.559 |
| -0.224 | 0.378  | -0.702 | 0.403  |
| 0.294  | 0.764  | 0.607  | 0.614  |
| 1.085  | 0.187  | 1.711  | 0.430  |
| -1.407 | -0.863 | -0.759 | -0.872 |
| -0.042 | 0.224  | 0.279  | 0.168  |
| 0.028  | -0.436 | -1.004 | -0.494 |
| -0.535 | 1.402  | -0.668 | 1.315  |
| 1.345  | 0.662  | 0.569  | 0.502  |
| 0.721  | -0.849 | 0.548  | -0.935 |
| 2.349  | 0.930  | 2.718  | 1.070  |
| -0.949 | 0.156  | 0.025  | 0.045  |
| 1.568  | 1.678  | 2.763  | 1.980  |
| 0.655  | 0.312  | 0.611  | 0.431  |
| 0.704  | -1.019 | 0.846  | -1.015 |
| 0.198  | -0.183 | -0.289 | -0.104 |
| -0.862 | -0.195 | -0.051 | -0.159 |
| 0.173  | 0.595  | 1.219  | 0.805  |
| 2.508  | 0.182  | 2.355  | 0.319  |
| 0.143  | 0.817  | 0.685  | 0.757  |
| 0.517  | 2.086  | 1.684  | 2.006  |
| -1.859 | -0.934 | -3.104 | -0.720 |
| 0.641  | 0.045  | -0.355 | -0.138 |
| -0.983 | 0.668  | -0.764 | 0.514  |
| -0.541 | 1.541  | -1.254 | 1.440  |
| -0.371 | -1.131 | -0.657 | -0.631 |
| -0.426 | 0.369  | -0.503 | 0.548  |
| -1.750 | -1.990 | -2.140 | -2.230 |
| 1.201  | -1.521 | 0.751  | -1.567 |
| -0.727 | -1.002 | -1.183 | -1.215 |

|        |        |        |        |
|--------|--------|--------|--------|
| -0.746 | -1.170 | -1.715 | -1.562 |
| -0.478 | -0.613 | -0.791 | -0.786 |
| 0.423  | -1.220 | -0.365 | -0.939 |
| 0.949  | -1.092 | 0.736  | -0.799 |
| 1.167  | 0.890  | 1.602  | 1.073  |
| 0.691  | -0.143 | 0.653  | -0.257 |
| -1.066 | -0.220 | -1.181 | -0.189 |
| -0.201 | -0.664 | 0.000  | -0.839 |
| 1.280  | 0.748  | 1.903  | 0.693  |
| 1.707  | 1.602  | 2.629  | 1.852  |
| -1.060 | -0.701 | -0.252 | -0.609 |
| -0.211 | -0.717 | 0.072  | -0.757 |
| 0.316  | 0.433  | 0.296  | 0.361  |
| 1.306  | 1.715  | 1.255  | 1.940  |
| -0.599 | -0.473 | -0.565 | -0.441 |
| 0.715  | -0.457 | 0.726  | -0.487 |
| 1.352  | 0.176  | 1.069  | 0.207  |
| 0.102  | 0.334  | -1.253 | 0.515  |
| -0.089 | 0.245  | -0.191 | 0.079  |
| -0.295 | 0.767  | -0.583 | 0.674  |
| 0.995  | 0.635  | 1.186  | 0.613  |
| -0.662 | 0.956  | -0.570 | 0.607  |
| -1.858 | -1.412 | -3.136 | -1.614 |
| 0.494  | 0.565  | 0.287  | 0.711  |
| 0.646  | 1.154  | 0.266  | 0.589  |
| 1.076  | 2.035  | 2.674  | 1.786  |
| -0.064 | 0.804  | 0.502  | 0.614  |
| 0.863  | -0.832 | 0.347  | -0.635 |
| 0.202  | -0.173 | 0.279  | -0.389 |
| -1.167 | -1.512 | -1.202 | -1.621 |
| -1.426 | -0.916 | -1.210 | -0.719 |
| 0.658  | 0.217  | 0.363  | 0.569  |
| 0.794  | -2.722 | -0.387 | -2.693 |
| 0.217  | 0.310  | 0.914  | 0.311  |
| 0.267  | 0.751  | 0.518  | 0.636  |
| -0.063 | -0.337 | -0.168 | -0.657 |
| 0.646  | 0.238  | 1.609  | 0.394  |
| 0.892  | -0.197 | 0.600  | 0.395  |
| -0.200 | -0.542 | -0.964 | -0.941 |
| 0.000  | -0.439 | -0.100 | -0.755 |
| -0.314 | -0.944 | -1.323 | -1.449 |
| -0.858 | -0.869 | -2.201 | -1.047 |
| 0.051  | 0.167  | 0.576  | 0.139  |
| -0.865 | -0.221 | -0.745 | -0.096 |
| -0.128 | -0.408 | -1.004 | -0.424 |
| 0.638  | -0.247 | -0.712 | 0.042  |
| 0.861  | 1.885  | 1.716  | 1.608  |

|        |        |        |        |
|--------|--------|--------|--------|
| -0.671 | -0.515 | -1.251 | -0.543 |
| 0.658  | 0.273  | 0.996  | -0.162 |
| 0.616  | -4.588 | -0.194 | -5.797 |
| -1.071 | -0.991 | -1.752 | -0.654 |
| 1.920  | 1.739  | 1.832  | 1.794  |
| 0.805  | 1.205  | 1.503  | 1.552  |
| 1.128  | 1.191  | 2.093  | 1.665  |
| 0.692  | -0.548 | 0.910  | -0.348 |
| 1.191  | 0.746  | 1.411  | 0.688  |
| 1.343  | 0.646  | 2.300  | 0.951  |
| -0.925 | -0.388 | -0.201 | -0.244 |
| -0.083 | -1.071 | 0.067  | -0.499 |
| -1.019 | 0.855  | -0.653 | 0.966  |
| 1.518  | 1.162  | 0.901  | 1.728  |
| -0.202 | 0.077  | -0.115 | 0.214  |
| 1.111  | 1.019  | 1.093  | 1.319  |
| 0.047  | 1.026  | 0.293  | 1.203  |
| -0.294 | 0.226  | -0.589 | 0.319  |
| 0.153  | -0.925 | 0.281  | -0.685 |
| -0.673 | -0.369 | -1.045 | -0.656 |
| -1.036 | -0.759 | -1.224 | -0.701 |
| -0.408 | -0.682 | -0.520 | -0.539 |
| 1.787  | -0.794 | 0.262  | -1.367 |
| 0.694  | 0.072  | 0.216  | -0.008 |
| -0.059 | 1.256  | 0.444  | 0.801  |
| -0.836 | -0.486 | -1.621 | -1.041 |
| 0.295  | 0.498  | 1.206  | 1.245  |
| -0.201 | -0.647 | 0.373  | 0.610  |
| 1.023  | 0.700  | -0.022 | 0.142  |
| 0.315  | -0.433 | -0.006 | -0.252 |
| -1.907 | 0.048  | -1.414 | -0.116 |
| 0.569  | -0.524 | 0.860  | -0.671 |
| -2.041 | -0.833 | -2.010 | -1.075 |
| -0.350 | 0.857  | 0.546  | 0.697  |
| -3.148 | -2.013 | -3.628 | -2.205 |
| -0.112 | -0.183 | -0.405 | -0.214 |
| 1.391  | 0.899  | 1.413  | 0.995  |
| -0.892 | -0.254 | -0.970 | -0.651 |
| -2.469 | -0.827 | -2.567 | -1.025 |
| -0.691 | -1.496 | 0.466  | -1.465 |
| 2.398  | 0.655  | 2.903  | 0.908  |
| 0.325  | 1.401  | 0.725  | 1.316  |
| -1.397 | 0.364  | -0.732 | 0.375  |
| -1.751 | -1.194 | -1.566 | -1.504 |
| 0.077  | -0.417 | -0.481 | 0.081  |
| 1.000  | 0.803  | 1.719  | 1.386  |
| 0.585  | 0.718  | 0.869  | 0.740  |

|         |         |         |         |
|---------|---------|---------|---------|
| 0.569   | 0.018   | 0.034   | 0.002   |
| 0.390   | 0.061   | 0.571   | -0.008  |
| -1.506  | 0.145   | -1.055  | 0.884   |
| 1.129   | 0.537   | 0.708   | 0.948   |
| -1.820  | -0.307  | -2.058  | -0.595  |
| 1.149   | 0.253   | 0.147   | 0.245   |
| -5.171  | -2.553  | -5.036  | -2.338  |
| -0.886  | -1.636  | -1.332  | -2.564  |
| 0.242   | -0.636  | 2.142   | 0.046   |
| -3.701  | -4.573  | -5.365  | -5.385  |
| -6.340  | -5.286  | -7.104  | -6.916  |
| 2.149   | -0.125  | 2.282   | 0.647   |
| 3.547   | 3.051   | 4.085   | 3.971   |
| 0.197   | 0.061   | 0.821   | 1.077   |
| -2.341  | 0.007   | -1.545  | -0.132  |
| -1.475  | -3.734  | -2.038  | -3.762  |
| -7.016  | -11.165 | -7.841  | -10.256 |
| 1.150   | 0.298   | 0.449   | -0.189  |
| -0.217  | -3.488  | -0.533  | -4.634  |
| -12.433 | -11.603 | -11.689 | -13.295 |
| 0.890   | -2.815  | -0.099  | -3.275  |
| -8.389  | -6.108  | -10.529 | -5.144  |
| 0.584   | 3.912   | 1.637   | 6.128   |
| -10.011 | -12.239 | -12.360 | -13.889 |
| -2.014  | 1.225   | -3.660  | -1.303  |
| 3.047   | 0.405   | 4.290   | 0.177   |
| -4.370  | 0.869   | -7.134  | -1.561  |
| 4.328   | 8.012   | 7.384   | 10.801  |
| 5.345   | 4.715   | 7.717   | 7.272   |
| 2.064   | 2.639   | 5.912   | 3.371   |
| -3.478  | -5.551  | -8.507  | -7.299  |
| -2.604  | -2.586  | -2.664  | -3.200  |
| 2.108   | 0.714   | 3.564   | 0.666   |
| -1.683  | 0.311   | -2.668  | 1.127   |
| 0.705   | 1.714   | 0.095   | 1.020   |
| -1.802  | 0.000   | -2.704  | -1.075  |
| 2.721   | 4.854   | 4.437   | 5.367   |
| 4.775   | 2.505   | 5.419   | 3.335   |
| -0.513  | 0.062   | -1.419  | 0.320   |
| 4.925   | 5.383   | 5.363   | 6.528   |
| -1.039  | 2.209   | -1.511  | 2.933   |
| 3.440   | 1.363   | 3.522   | 3.130   |
| -4.694  | -3.824  | -5.622  | -4.345  |
| -1.533  | -0.110  | 0.135   | -0.488  |
| 0.451   | -1.034  | -0.829  | -1.340  |
| 0.337   | 0.865   | 0.084   | 1.031   |
| -4.434  | -1.909  | -3.254  | -1.656  |

|        |        |        |        |
|--------|--------|--------|--------|
| 0.779  | 4.559  | 1.747  | 4.713  |
| 2.205  | 4.281  | 2.652  | 4.246  |
| 0.737  | 0.173  | 0.439  | 0.565  |
| 0.563  | 0.502  | 0.621  | 0.492  |
| -0.131 | 0.437  | 1.145  | -0.448 |
| 5.241  | 2.493  | 3.929  | 3.102  |
| -1.019 | -1.393 | -0.988 | -2.032 |
| -1.923 | -0.921 | -2.689 | -2.030 |
| -0.349 | 0.124  | -0.796 | 0.935  |
| 1.659  | 1.587  | 1.830  | 0.875  |
| -0.671 | -0.184 | -1.469 | -0.596 |
| 0.327  | 1.354  | 0.727  | 2.208  |
| 1.673  | 1.381  | 3.525  | 2.545  |
| -1.601 | -1.177 | -1.129 | -1.229 |
| 0.903  | 0.481  | 0.988  | 0.496  |
| -2.125 | -0.436 | -1.007 | -0.450 |
| -2.058 | -0.309 | -3.251 | -0.706 |
| 1.783  | 2.124  | 0.511  | 2.611  |
| 4.270  | 2.145  | 3.235  | 2.831  |
| 2.129  | 1.009  | 2.749  | 1.551  |
| 0.723  | 1.176  | 1.922  | 1.592  |
| 0.666  | -1.176 | -0.276 | -1.082 |
| -1.717 | -0.410 | -1.637 | -0.487 |
| 2.514  | -1.057 | 2.295  | -0.391 |
| 0.287  | -0.540 | -1.178 | -1.205 |
| 2.084  | 1.381  | 1.341  | 1.457  |
| -1.663 | 0.223  | -3.702 | -0.971 |
| 1.581  | 1.897  | 2.417  | 2.192  |
| 3.949  | 0.830  | 5.230  | 1.931  |
| 2.135  | 0.231  | 3.825  | 0.319  |
| -0.062 | 0.842  | -0.620 | 0.994  |
| 1.558  | 1.548  | 2.357  | 1.266  |
| 0.595  | 2.027  | 0.455  | 0.019  |
| 1.330  | 0.053  | 0.916  | -0.182 |
| -2.616 | 0.000  | -1.955 | 0.194  |
| -1.961 | -3.434 | -2.754 | -3.182 |
| 0.016  | -0.388 | 0.209  | -0.505 |
| -2.289 | -1.350 | -3.686 | -1.838 |
| 0.257  | 0.239  | 0.163  | 0.811  |
| 2.690  | 1.395  | 4.135  | 0.396  |
| -1.447 | -1.297 | -1.936 | -0.891 |
| 1.914  | 1.172  | 1.502  | 0.914  |
| -0.984 | 0.856  | 0.122  | 1.617  |
| 2.019  | 1.670  | 2.576  | 2.532  |
| -2.491 | -1.183 | -2.277 | -1.976 |
| -0.601 | -0.859 | -0.760 | -0.269 |
| -0.620 | -0.186 | -1.118 | -0.558 |

|        |        |        |        |
|--------|--------|--------|--------|
| 1.158  | 0.076  | 1.319  | 0.229  |
| -0.808 | 1.420  | -0.270 | 2.340  |
| 0.523  | 0.191  | 1.361  | 0.506  |
| 1.632  | 0.278  | 2.429  | 1.266  |
| 1.268  | 1.199  | 0.260  | 1.044  |
| -0.123 | 0.388  | -0.572 | 0.639  |
| 1.694  | 2.132  | 2.490  | 2.562  |
| -0.212 | 0.254  | 0.892  | 0.444  |
| -0.425 | 0.052  | -0.041 | -0.013 |
| 1.751  | 0.111  | 2.094  | 0.036  |
| -0.826 | -0.849 | -2.355 | -1.103 |
| 1.616  | 0.999  | 2.135  | 1.486  |
| -0.312 | -0.267 | -0.313 | -0.303 |
| -0.224 | 0.364  | -0.076 | 0.393  |
| 0.595  | 1.219  | 0.728  | 1.861  |
| 0.503  | 1.785  | 2.322  | 3.318  |
| 1.145  | 0.107  | -0.692 | 0.268  |
| 0.204  | -0.498 | -0.752 | -1.028 |
| -0.277 | -0.101 | -1.952 | -0.444 |
| 2.708  | 3.684  | 3.279  | 3.956  |
| -0.828 | -0.134 | -0.254 | -0.169 |
| -0.965 | -0.018 | 0.616  | -0.349 |
| -3.086 | -2.211 | -4.235 | -3.066 |
| -0.374 | 0.081  | -1.722 | 0.615  |
| -2.135 | -1.426 | -2.034 | -0.863 |
| -0.276 | 0.832  | -0.384 | 1.070  |
| 2.575  | 2.559  | 3.243  | 3.513  |
| -0.947 | -0.817 | -1.971 | -1.834 |
| -0.121 | -1.774 | -2.168 | -2.317 |
| -0.606 | -0.057 | -0.770 | -0.047 |
| 0.757  | -2.153 | 0.860  | -2.379 |
| 1.795  | 0.608  | 1.526  | 0.119  |
| 0.606  | 1.205  | -0.025 | 1.923  |
| 0.280  | -0.290 | -0.197 | 0.261  |
| -0.324 | 1.910  | -0.696 | 1.375  |
| 0.074  | -0.199 | 0.730  | 0.433  |
| 0.587  | -1.433 | 0.034  | -2.597 |
| -3.154 | -0.531 | -2.386 | -0.961 |
| 1.381  | 0.209  | 2.805  | -0.077 |
| 1.948  | 1.069  | 2.753  | 1.057  |
| -0.925 | -0.106 | 0.151  | -0.317 |
| 0.706  | 1.059  | 0.353  | 1.292  |
| 0.117  | -0.522 | -0.174 | -0.702 |
| 0.874  | 1.601  | 0.812  | 2.097  |
| -2.066 | -0.461 | -3.769 | 0.070  |
| 0.811  | 0.602  | 2.819  | 0.596  |
| -0.930 | -1.400 | -2.314 | -1.979 |

|        |        |        |        |
|--------|--------|--------|--------|
| -0.669 | -0.654 | -1.205 | -1.286 |
| 0.655  | -1.106 | -0.773 | -2.019 |
| -0.148 | -0.895 | -0.647 | -0.923 |
| 1.810  | 2.438  | 4.299  | 3.659  |
| 0.669  | 0.565  | 0.449  | -0.288 |
| 1.524  | -0.248 | 0.130  | -1.001 |
| 0.086  | 1.637  | 0.430  | 2.535  |
| -0.086 | 0.730  | 1.035  | 1.734  |
| 0.185  | 0.182  | 0.567  | 0.736  |
| -1.290 | -1.591 | -1.279 | -2.177 |
| -0.376 | -0.437 | -1.149 | -0.133 |
| -5.201 | -3.722 | -6.667 | -5.862 |
| -0.719 | 0.326  | 1.232  | 0.163  |
| -1.206 | -2.097 | -0.293 | -3.414 |
| -0.156 | 0.182  | 0.004  | -0.049 |
| -0.782 | -0.437 | -2.260 | -0.905 |
| 1.449  | 1.241  | 2.329  | 2.224  |
| 1.123  | 1.219  | 1.334  | 1.473  |
| 0.777  | 0.153  | 1.531  | 0.357  |
| -0.213 | 0.755  | 1.031  | 0.994  |
| 0.969  | -0.704 | 1.415  | -2.071 |
| 0.780  | 0.596  | -0.217 | 0.686  |
| -0.419 | -0.209 | -0.514 | -1.285 |
| -0.030 | -0.140 | -0.318 | -0.324 |
| 1.609  | 0.664  | 0.227  | 1.161  |
| 1.830  | 2.121  | 2.137  | 2.741  |
| 0.420  | 0.321  | 0.512  | 0.371  |
| -1.221 | -1.058 | -1.369 | -1.538 |
| 1.033  | 1.169  | 0.950  | 1.015  |
| -0.799 | -1.194 | -1.711 | -1.681 |
| 1.664  | 0.571  | 0.953  | 1.625  |
| 0.558  | -0.019 | 0.819  | 0.420  |
| 1.065  | -0.130 | -0.008 | -0.309 |
| 1.888  | 0.352  | 2.054  | -1.313 |
| -0.472 | -0.539 | -0.131 | -0.071 |
| 0.014  | -0.217 | 1.052  | -0.325 |
| -0.586 | -1.454 | -0.318 | -1.218 |
| -0.999 | 0.441  | -0.386 | 0.242  |
| -4.719 | -3.739 | -4.789 | -5.986 |
| -1.554 | -0.700 | -1.674 | -0.881 |
| 0.181  | 1.221  | 1.068  | 0.991  |
| 0.898  | 1.078  | 1.877  | 1.647  |
| 3.022  | 1.863  | 2.239  | 3.069  |
| 0.734  | -0.543 | 1.845  | -0.392 |
| 2.857  | 3.663  | 4.616  | 5.023  |
| 1.508  | 1.202  | 1.970  | 1.058  |
| 3.309  | -0.526 | 2.593  | -1.356 |

|        |        |        |        |
|--------|--------|--------|--------|
| 0.119  | -1.122 | -1.883 | -3.559 |
| -0.546 | -0.227 | -0.817 | -0.079 |
| -1.411 | 0.955  | 0.327  | 1.005  |
| 0.392  | -0.372 | -0.205 | 0.171  |
| 3.145  | 1.040  | 1.701  | 1.879  |
| -1.011 | -0.589 | -1.148 | -0.506 |
| 0.145  | -0.568 | 0.368  | 0.281  |
| -0.158 | -1.126 | -1.566 | 0.103  |
| -0.132 | 0.912  | 0.938  | 1.081  |
| -1.303 | -1.526 | -0.485 | 0.343  |
| 0.080  | 0.249  | 1.371  | 0.435  |
| 0.958  | 0.878  | 0.395  | 2.673  |
| 1.695  | 0.166  | 0.264  | 0.780  |
| -2.533 | -0.573 | -3.493 | -1.485 |
| 1.630  | 1.929  | 2.679  | 0.805  |
| 1.111  | 0.236  | 0.109  | 1.859  |
| 1.484  | 0.753  | 1.810  | 1.746  |
| -0.372 | -0.072 | 0.424  | -0.521 |
| 2.023  | 0.844  | 0.856  | 1.316  |
| 0.101  | 0.232  | 0.471  | 0.514  |
| 0.565  | -0.507 | 0.524  | -0.922 |
| 0.163  | -0.383 | -1.058 | 1.122  |
| -0.138 | 0.341  | 0.063  | -0.280 |
| 1.613  | -0.239 | 0.814  | -0.656 |
| 0.785  | 1.221  | 1.129  | 1.034  |
| 0.414  | 0.860  | 0.369  | 1.471  |
| 2.285  | 1.976  | 2.745  | 2.427  |
| 1.592  | 0.000  | 0.634  | 0.763  |
| -3.295 | -1.612 | -2.567 | -1.091 |
| 0.519  | -0.781 | -0.260 | -0.332 |
| 0.743  | 1.242  | 0.920  | 1.772  |
| 0.239  | -0.047 | -0.445 | -0.502 |
| 0.760  | -0.327 | -0.800 | -0.539 |
| -0.915 | 0.134  | -0.103 | 0.161  |
| 0.962  | 1.500  | 1.633  | 2.269  |
| -0.106 | -0.571 | -0.515 | -0.671 |
| 2.373  | 3.135  | 0.981  | 2.986  |
| -3.623 | -0.146 | -2.549 | 0.920  |
| -0.024 | -0.225 | -0.429 | -0.726 |
| -0.096 | -0.113 | -1.323 | 1.198  |
| 1.842  | -1.001 | 2.299  | -0.751 |
| -1.938 | -1.368 | -1.053 | -3.446 |
| 0.180  | 0.121  | 0.757  | 0.499  |
| 1.546  | 0.385  | 1.215  | 0.777  |
| 0.612  | 0.965  | 1.412  | 1.555  |
| -0.706 | -1.701 | -0.467 | -3.701 |
| 3.231  | 1.155  | 3.282  | 2.279  |

|        |        |        |        |
|--------|--------|--------|--------|
| -1.058 | 1.107  | 0.731  | 0.977  |
| 1.946  | 0.389  | 0.690  | 0.486  |
| -1.611 | -0.950 | -2.204 | 0.525  |
| -1.520 | -0.290 | 0.870  | -0.035 |
| 1.543  | -0.417 | -0.268 | -1.089 |
| -2.472 | -2.250 | -2.003 | -3.889 |
| 1.068  | 0.874  | 0.651  | 0.510  |
| -0.868 | -0.331 | -0.139 | -0.220 |
| 0.774  | 0.719  | 0.030  | 1.857  |
| -0.798 | -0.017 | 1.019  | -0.026 |
| 0.868  | 1.166  | 0.827  | 1.827  |
| 1.634  | -0.970 | 0.817  | -1.189 |
| 1.097  | 1.135  | 2.524  | 1.456  |
| 1.119  | 0.857  | 0.524  | 1.144  |
| 1.118  | -0.289 | 1.285  | 0.170  |
| 1.391  | 0.886  | 1.573  | 1.099  |
| 0.131  | -0.315 | 0.589  | -0.847 |
| 0.546  | -0.079 | 1.074  | -0.651 |
| 0.802  | 0.658  | -0.147 | 1.216  |
| -1.787 | -1.156 | -1.297 | -1.594 |
| 0.843  | -1.543 | -0.331 | -2.579 |
| 1.041  | 0.339  | 1.024  | 0.781  |
| 0.323  | 1.107  | -0.823 | -0.346 |
| -0.518 | -1.130 | -1.128 | -1.608 |
| -0.749 | 0.275  | -0.354 | 0.945  |
| 0.641  | 0.040  | -0.830 | -1.149 |
| -2.388 | -2.902 | -3.308 | -3.859 |
| 2.992  | 1.218  | 4.031  | 2.355  |
| 1.102  | 0.655  | 0.689  | 0.632  |
| -0.181 | -0.226 | 0.538  | -0.873 |
| -0.245 | -0.505 | -1.364 | -0.801 |
| -0.697 | -0.760 | -1.398 | -1.104 |
| 0.151  | -0.624 | -0.724 | -1.061 |
| 1.228  | 1.395  | 1.605  | 3.658  |
| 1.965  | 0.499  | 1.955  | 0.428  |
| 0.436  | 1.244  | 2.255  | 2.663  |
| -1.010 | -0.966 | -2.179 | -0.985 |
| 0.459  | -0.035 | -0.327 | 0.563  |
| 0.654  | 0.023  | 0.524  | -0.091 |
| -1.386 | -0.859 | -1.461 | -0.735 |
| 1.137  | 0.122  | 1.053  | -1.747 |
| -0.991 | 0.209  | -0.367 | -0.068 |
| 0.188  | -0.699 | 0.233  | -0.331 |
| -2.521 | -2.027 | -1.333 | -2.186 |
| -0.689 | -0.743 | -1.432 | -2.444 |
| -0.498 | -0.888 | -1.469 | -1.577 |
| 2.973  | 1.565  | 2.895  | 1.876  |

|        |        |        |        |
|--------|--------|--------|--------|
| 0.074  | -0.335 | 1.262  | -0.387 |
| -0.116 | -0.746 | 0.558  | -0.241 |
| 0.714  | 0.428  | -0.006 | 1.401  |
| 1.671  | 2.288  | 2.769  | 3.302  |
| 0.513  | -0.182 | 0.620  | 0.130  |
| 1.846  | 0.751  | 0.668  | 1.263  |
| -0.544 | -1.016 | -1.727 | -1.251 |
| 0.051  | 0.764  | -0.202 | 1.068  |
| -1.097 | -0.376 | -0.883 | -0.432 |
| -1.399 | -0.898 | -0.927 | -1.394 |
| 1.184  | 0.680  | 1.335  | 1.906  |
| 1.211  | 0.985  | 1.741  | 1.443  |
| 1.555  | 2.142  | 2.038  | 1.788  |
| 1.109  | 0.615  | -0.055 | 0.685  |
| -0.702 | -0.370 | -0.512 | -1.296 |
| -1.027 | -0.422 | -1.958 | -2.092 |
| 2.013  | 1.307  | 0.833  | 1.246  |
| -1.444 | -0.697 | -0.694 | 0.288  |
| -0.439 | -0.063 | 0.121  | 0.237  |
| 0.130  | 0.528  | 0.250  | 1.228  |
| -0.531 | -0.551 | -0.797 | -1.011 |
| -0.231 | 0.097  | 0.876  | 0.283  |
| -0.657 | -0.154 | -0.418 | -0.653 |
| -2.535 | -1.909 | -2.661 | -3.427 |
| 0.859  | 1.521  | 0.248  | 1.833  |
| -1.265 | -1.295 | -1.550 | -1.949 |
| 1.080  | 0.836  | 1.897  | 1.405  |
| 1.027  | 1.522  | 2.042  | 1.127  |
| 2.123  | 1.994  | 2.218  | 2.881  |
| 0.110  | -0.300 | -0.367 | -0.895 |
| -1.521 | -0.546 | -1.136 | -0.133 |
| -0.183 | -0.735 | -0.658 | -1.010 |
| -1.568 | -1.601 | -1.948 | -1.843 |
| 0.915  | 1.584  | 0.668  | 2.303  |
| 1.714  | 1.549  | 1.081  | 1.803  |
| 1.349  | 0.564  | 0.970  | 0.467  |
| -2.522 | -1.523 | -1.385 | -2.085 |
| 0.345  | 0.559  | 0.892  | 1.036  |
| -0.488 | 0.250  | 0.038  | -0.122 |
| -0.952 | 0.560  | -0.350 | 0.383  |
| 0.349  | 0.077  | 1.167  | 0.269  |
| -0.596 | -0.232 | 0.564  | 0.736  |
| 1.951  | -0.477 | 0.846  | 0.142  |
| 0.283  | 0.289  | 1.101  | -0.063 |
| 2.372  | 1.611  | 1.748  | 1.817  |
| 1.029  | 0.392  | 1.310  | 0.761  |
| -1.098 | -1.621 | -1.112 | -1.786 |

|        |        |        |        |
|--------|--------|--------|--------|
| 0.893  | 0.408  | 0.678  | 0.862  |
| -1.150 | -0.579 | -0.862 | -0.643 |
| -1.053 | -0.427 | -0.847 | -0.366 |
| 0.150  | -0.106 | 0.217  | -0.555 |
| -0.070 | 0.033  | -0.006 | -0.023 |
| -0.822 | -0.150 | -0.714 | 0.104  |
| -0.201 | -0.139 | 0.184  | 0.068  |
| -1.883 | -1.274 | -1.587 | -2.159 |
| 0.297  | 0.254  | 0.398  | 0.612  |
| -4.045 | -3.830 | -3.286 | -4.032 |
| -1.062 | -1.355 | -2.430 | -1.991 |
| -0.519 | 0.698  | -0.501 | 0.573  |
| -0.511 | -0.520 | -1.747 | -0.402 |
| 2.410  | 0.931  | 1.753  | 1.266  |
| 0.276  | 0.129  | 0.030  | 0.309  |
| 0.497  | 0.018  | 0.879  | 0.219  |
| -1.242 | -0.847 | -1.550 | -0.966 |
| -0.460 | -0.278 | 0.793  | 0.018  |
| 0.407  | 0.308  | 0.161  | -0.399 |
| 0.501  | 0.071  | -1.037 | 0.156  |
| -0.021 | 0.312  | 0.410  | 0.433  |
| 0.372  | -0.614 | -1.238 | -0.544 |
| 1.650  | 0.543  | 1.211  | 0.313  |
| -2.491 | -1.268 | -1.644 | -1.930 |
| 1.105  | 0.861  | 1.375  | 1.008  |
| 0.359  | -0.154 | -0.110 | -0.145 |
| -0.486 | -0.540 | -2.279 | -1.056 |
| 1.575  | 0.741  | 1.565  | 0.327  |
| -0.303 | 0.283  | 0.074  | -0.075 |
| -1.548 | -1.150 | 0.210  | -2.302 |
| -3.246 | -1.720 | -2.734 | -2.651 |
| 0.383  | -0.061 | -0.247 | 0.215  |
| 0.512  | 1.200  | 0.711  | 2.234  |
| 1.038  | 0.401  | 1.065  | 0.255  |
| -0.291 | -0.761 | -0.701 | -1.862 |
| 1.562  | 0.102  | -1.898 | 0.298  |
| -0.096 | -0.373 | -1.430 | -0.680 |
| 1.215  | 0.650  | 2.166  | 1.466  |
| 3.162  | 1.977  | 3.534  | 2.601  |
| -0.858 | -0.306 | -0.840 | -0.584 |
| 0.746  | 0.875  | 1.457  | 0.327  |
| 1.013  | -0.047 | -0.443 | -0.349 |
| -0.273 | 0.035  | 0.400  | 0.222  |
| -1.764 | -0.252 | 0.113  | 0.064  |
| -3.198 | -1.256 | -2.393 | -1.602 |
| -0.426 | -0.804 | -0.641 | -1.405 |
| -2.484 | 0.537  | 1.027  | 1.139  |

|        |        |        |        |
|--------|--------|--------|--------|
| 2.174  | 0.941  | 0.706  | 0.922  |
| -1.379 | -0.508 | -1.066 | -0.770 |
| 0.875  | 0.473  | 0.466  | 0.356  |
| 0.429  | 0.024  | -0.729 | -1.387 |
| 0.927  | -1.204 | -1.956 | -1.705 |
| -1.701 | -0.478 | 0.445  | -0.666 |
| -4.356 | -2.028 | -3.684 | -3.560 |
| -3.207 | -0.817 | -1.830 | -1.001 |
| 3.825  | 2.623  | 2.342  | 3.715  |
| 1.225  | 1.366  | 2.282  | 1.870  |
| -1.034 | -0.208 | -0.054 | 0.072  |
| 0.034  | -0.214 | -0.038 | -0.270 |
| 2.506  | 1.401  | 2.118  | 2.063  |
| 0.120  | 0.123  | 0.407  | 0.206  |
| 1.051  | 0.753  | 2.858  | 1.382  |
| -0.475 | 0.823  | 0.548  | 1.020  |
| -2.799 | -0.631 | -1.497 | -0.611 |
| 1.536  | 1.693  | 0.842  | 1.906  |
| -2.666 | -1.137 | -0.986 | -1.448 |
| -1.189 | -1.045 | -0.656 | -1.854 |
| -0.985 | -0.779 | -1.128 | -1.087 |
| -0.681 | -0.336 | -0.775 | -0.336 |
| 1.586  | 1.394  | 1.326  | 1.851  |
| -1.911 | -0.064 | -0.589 | -0.287 |
| -0.326 | 0.023  | -0.923 | 0.641  |
| -3.079 | -2.260 | -2.987 | -2.778 |
| 0.216  | -0.024 | -0.010 | -0.430 |
| -1.597 | -2.411 | -2.076 | -3.015 |
| 0.012  | -0.055 | 0.964  | 0.537  |
| 2.468  | 1.153  | 2.944  | 1.747  |
| 0.522  | 0.913  | 1.350  | 1.221  |
| -1.791 | -0.913 | -2.338 | -1.274 |
| -1.444 | 0.006  | -0.252 | 0.763  |
| -2.062 | -0.836 | -0.853 | -1.794 |
| -0.814 | -0.366 | 0.338  | -0.986 |
| 2.582  | 0.317  | 1.284  | 1.162  |
| -0.331 | -0.055 | 0.115  | -0.415 |
| 0.650  | 0.504  | -0.865 | 1.089  |
| 0.073  | -0.303 | 0.622  | -0.778 |
| 0.159  | -0.158 | -0.148 | -1.279 |
| 3.650  | 1.660  | 2.141  | 2.946  |
| 2.713  | 0.585  | -0.173 | 0.604  |
| 0.411  | 0.641  | 0.309  | 0.407  |
| 0.873  | 0.690  | 0.141  | 1.061  |
| 1.524  | 1.747  | 1.046  | 1.889  |
| 1.106  | 1.450  | -0.019 | 2.049  |
| 1.039  | 0.528  | 1.651  | 0.743  |

|        |        |        |        |
|--------|--------|--------|--------|
| -0.831 | 0.711  | -0.355 | 0.463  |
| 0.656  | 0.934  | 1.077  | 1.776  |
| 0.250  | 0.450  | 0.741  | 0.708  |
| -2.210 | -0.840 | -2.189 | -0.925 |
| 0.444  | -0.162 | -0.416 | -0.134 |
| -0.299 | 0.408  | -0.204 | 0.561  |
| -0.345 | -0.050 | -0.031 | -0.560 |
| -1.335 | -0.582 | -1.634 | -1.244 |
| -0.328 | 0.034  | -0.778 | 0.005  |
| -1.220 | -1.066 | -1.040 | -1.499 |
| -1.235 | 0.164  | -1.236 | 0.682  |
| 0.463  | -0.448 | 0.857  | -1.475 |
| 0.576  | 0.425  | 0.693  | -0.081 |
| 1.517  | 0.918  | 1.972  | 0.846  |
| -1.195 | 1.138  | 0.075  | 1.042  |
| 0.810  | 0.432  | 0.879  | 1.072  |
| -2.066 | 0.364  | -0.807 | -0.426 |
| 0.763  | -0.336 | -1.685 | -0.478 |
| 3.339  | 1.049  | 1.754  | 1.728  |
| -2.331 | -0.432 | -1.272 | 0.036  |
| 0.421  | 0.400  | 1.059  | 0.358  |
| -0.832 | -0.696 | -1.170 | -0.966 |
| -0.023 | 0.033  | 0.073  | -0.311 |
| -1.302 | -1.178 | -1.253 | -1.247 |
| -1.190 | -1.159 | -1.637 | -1.536 |
| -0.695 | -0.842 | -0.251 | -1.019 |
| -1.093 | -0.581 | -0.870 | -0.358 |
| -1.432 | -1.166 | -1.693 | -1.043 |
| -4.663 | -2.540 | -5.620 | -3.421 |
| 2.359  | 0.201  | 2.464  | 1.823  |
| 3.245  | 0.566  | 2.820  | -0.463 |
| 2.758  | 0.258  | 2.880  | -0.238 |
| -0.327 | -1.323 | -0.236 | -1.235 |
| -1.451 | -0.866 | -1.337 | -1.280 |
| 1.334  | 0.275  | 1.232  | 1.214  |
| 0.655  | 1.260  | 1.003  | 2.272  |
| -0.643 | 0.618  | 0.486  | 0.980  |
| -1.691 | -1.288 | -1.966 | -1.694 |
| -1.684 | 0.077  | -1.495 | -1.098 |
| -0.645 | -0.411 | -0.705 | -1.226 |
| 0.572  | -0.586 | 0.030  | -0.829 |
| -1.221 | -0.481 | -0.098 | -1.252 |
| 0.954  | 1.692  | 1.177  | 2.288  |
| 2.725  | 0.172  | 1.709  | 0.090  |
| -1.612 | -1.005 | -1.213 | -1.302 |
| 1.232  | 1.194  | 0.543  | 1.891  |
| 0.297  | 0.853  | 0.769  | 1.057  |

|        |        |        |        |
|--------|--------|--------|--------|
| 1.448  | 1.430  | 1.627  | 1.488  |
| -0.058 | 0.581  | 0.437  | 0.750  |
| -0.375 | -0.408 | -0.682 | -0.611 |
| -0.141 | 0.167  | -0.162 | 0.199  |
| 0.023  | 0.236  | 0.374  | 0.590  |
| 0.282  | 0.652  | -0.019 | 0.860  |
| -0.199 | 0.006  | 0.895  | 0.163  |
| 1.086  | 0.795  | 0.456  | 1.373  |
| 1.852  | 0.136  | 1.846  | -0.272 |
| -1.424 | -1.359 | -0.941 | -2.140 |
| 0.035  | 0.565  | -0.016 | 0.595  |
| -0.116 | 0.148  | -0.155 | 0.200  |
| 2.852  | 1.820  | 1.585  | 2.428  |
| 3.013  | 3.203  | 3.423  | 3.439  |
| -0.910 | -0.450 | -0.144 | -0.563 |
| -1.208 | -0.698 | -0.606 | -1.214 |
| -2.129 | -0.725 | -1.921 | -0.153 |
| 3.006  | 0.725  | 1.560  | 0.930  |
| 2.509  | 1.407  | 2.260  | 1.673  |
| -0.833 | -2.120 | -0.628 | -3.220 |
| -4.636 | -2.974 | -4.393 | -3.947 |
| 1.413  | -0.125 | 0.526  | 0.391  |
| 2.482  | 0.397  | 1.925  | 0.426  |
| -2.977 | -1.879 | -1.999 | -2.358 |
| -2.767 | -0.393 | -1.506 | -0.717 |
| 3.262  | 2.369  | 3.459  | 2.727  |
| 0.960  | 2.109  | 1.955  | 2.786  |
| -0.647 | -0.039 | -1.039 | 0.088  |
| 0.268  | -0.600 | 0.602  | -1.392 |
| -0.290 | -0.151 | -1.326 | -0.079 |
| 0.391  | 0.518  | 0.173  | 1.003  |
| 1.515  | 0.642  | 1.862  | 0.246  |
| 0.722  | 1.032  | 0.993  | 1.449  |
| 1.836  | 0.756  | 1.615  | 0.716  |
| 0.214  | -0.315 | -0.276 | 0.007  |
| 1.051  | -0.923 | -0.195 | -0.985 |
| -1.716 | -0.511 | 0.076  | -0.757 |
| 2.243  | 1.167  | 1.642  | 1.763  |
| 2.008  | 0.457  | 0.706  | 0.891  |
| -1.025 | -1.047 | -1.396 | -1.253 |
| 1.179  | -0.837 | -0.707 | -0.804 |
| -1.190 | -0.188 | -0.320 | 0.150  |
| -0.250 | -2.649 | -3.333 | -1.406 |
| 0.063  | 2.682  | 2.000  | 2.689  |
| 3.484  | 1.402  | 0.677  | 2.433  |
| 2.663  | 1.436  | 2.788  | 1.777  |
| -0.758 | -0.253 | -0.547 | 0.039  |

|        |        |        |        |
|--------|--------|--------|--------|
| 0.010  | 0.339  | 1.699  | 0.233  |
| -1.976 | -2.455 | -4.505 | -2.498 |
| -1.135 | -2.234 | -1.781 | -0.794 |
| -0.973 | 1.004  | -0.211 | 1.671  |
| -0.733 | 1.302  | 2.169  | 0.878  |
| 1.380  | 1.166  | 1.866  | 1.735  |
| -1.421 | -0.087 | 0.511  | -0.704 |
| -2.648 | -3.120 | -2.220 | -3.998 |
| -0.845 | -0.807 | -1.470 | -0.957 |
| 1.619  | 2.876  | 4.724  | 2.698  |
| 3.499  | 2.485  | 1.706  | 3.122  |
| -1.170 | 0.252  | -0.593 | 0.747  |
| 0.464  | 0.476  | 0.679  | 0.950  |
| -0.195 | -0.027 | 0.805  | -0.306 |
| 0.841  | 0.123  | 0.003  | 0.688  |
| 1.821  | 0.727  | 1.482  | 1.046  |
| -2.600 | -0.440 | -1.147 | -0.665 |
| -3.380 | -1.132 | -0.741 | -1.584 |
| 0.848  | 1.111  | 2.030  | 1.185  |
| 3.168  | 1.272  | 1.272  | 1.827  |
| -1.110 | -0.679 | -1.139 | -0.667 |
| -0.031 | 1.165  | 0.305  | 1.628  |
| -0.207 | 0.847  | 0.016  | 0.889  |
| -0.801 | -2.071 | -1.443 | -2.306 |
| -1.664 | -1.212 | -0.708 | -1.574 |
| -0.832 | -0.687 | -1.395 | -0.360 |
| 3.577  | 0.649  | 1.653  | 1.115  |
| 0.031  | -0.612 | 0.348  | -0.414 |
| -0.114 | 0.188  | -0.221 | 0.412  |
| -0.852 | 0.525  | -1.947 | 0.963  |
| -1.461 | -0.563 | -1.558 | -0.353 |
| -0.180 | 0.375  | -0.290 | 0.061  |
| -1.270 | -1.277 | -1.307 | -1.141 |
| 0.011  | -0.915 | -1.089 | -0.923 |
| -3.208 | -1.823 | -2.313 | -2.640 |
| -3.739 | -3.234 | -2.208 | -4.136 |
| -3.993 | -2.341 | -3.360 | -3.062 |
| 0.323  | -1.037 | 0.594  | -1.506 |
| -0.707 | 0.238  | -0.801 | 0.486  |
| 0.981  | 1.392  | 0.576  | 1.394  |
| 2.760  | 0.811  | 2.029  | 0.850  |
| -1.060 | -1.540 | -1.318 | -1.985 |
| 0.828  | 0.665  | 0.088  | 0.936  |
| -2.374 | -0.164 | -1.599 | -0.099 |
| -2.018 | -1.425 | -1.964 | -1.281 |
| -2.868 | -2.040 | -2.290 | -2.747 |
| -3.197 | -4.431 | -3.525 | -6.017 |

|        |        |        |        |
|--------|--------|--------|--------|
| -0.336 | -0.235 | 1.138  | -0.093 |
| 1.998  | 1.624  | 2.033  | 1.299  |
| -3.051 | -2.205 | -0.868 | -2.770 |
| 3.216  | 1.834  | 1.642  | 2.990  |
| 0.025  | 0.858  | 0.352  | 1.314  |
| 1.382  | 2.318  | 1.535  | 2.913  |
| -1.446 | -1.554 | -0.769 | -1.681 |
| -0.470 | 0.991  | -0.626 | 1.025  |
| 0.076  | -0.086 | -0.046 | 0.186  |
| 2.993  | 1.068  | 2.351  | 1.905  |
| -0.867 | -1.338 | -1.560 | -1.064 |
| -1.202 | -0.642 | -1.728 | 0.036  |
| 2.782  | 1.474  | 2.945  | 1.374  |
| 1.411  | 1.236  | 2.646  | 1.687  |
| 0.854  | 0.762  | 2.390  | 0.822  |
| -1.703 | -0.714 | -1.871 | -0.648 |
| 1.727  | 1.908  | 0.138  | 1.989  |
| -1.520 | -0.296 | -0.198 | -0.253 |
| 0.158  | 0.390  | 0.380  | 0.164  |
| -1.013 | -0.836 | -1.476 | -0.784 |
| -0.998 | -0.071 | -0.054 | -0.185 |
| -2.406 | -2.173 | -1.687 | -2.618 |
| -3.040 | -1.545 | -3.810 | -1.899 |
| -3.961 | -4.546 | -3.996 | -5.616 |
| -1.136 | -1.243 | -0.084 | -1.366 |
| 2.876  | 0.744  | 2.846  | 0.634  |
| -0.268 | -1.493 | -0.194 | -1.557 |
| -1.011 | -1.536 | -1.691 | -1.388 |
| 1.865  | 1.450  | 3.246  | 1.711  |
| -2.109 | -2.894 | -1.986 | -3.223 |
| -1.133 | -2.596 | -0.635 | -3.049 |
| 1.323  | 2.902  | 2.305  | 3.418  |
| 0.217  | 2.119  | 1.715  | 1.992  |
| -0.230 | -1.094 | -1.544 | -0.644 |
| -1.791 | -1.630 | -2.105 | -2.785 |
| -1.908 | -2.262 | -2.801 | -2.818 |
| -2.118 | -0.147 | -0.829 | -0.461 |
| -0.982 | -2.018 | -0.621 | -1.679 |
| 0.881  | -0.514 | -0.668 | -0.981 |
| 1.300  | 4.243  | 3.346  | 4.179  |
| 1.856  | -0.938 | -0.024 | -0.423 |
| -3.099 | -2.591 | -2.732 | -2.927 |
| -1.404 | -0.836 | 0.140  | -1.381 |
| -0.614 | -0.072 | -1.376 | -0.033 |
| -5.114 | -3.098 | -4.376 | -3.663 |
| 1.044  | 1.265  | 2.208  | 1.705  |
| 2.608  | 2.212  | 2.327  | 3.153  |

|        |        |        |        |
|--------|--------|--------|--------|
| -0.209 | 1.469  | 0.772  | 1.549  |
| -0.553 | -0.395 | -0.559 | -0.292 |
| 0.075  | 0.459  | 0.993  | -0.008 |
| 3.272  | 0.302  | 1.742  | 0.242  |
| -1.255 | -0.690 | -1.079 | -0.264 |
| 0.775  | 0.402  | 0.656  | 0.338  |
| 0.451  | 1.037  | 0.148  | 1.583  |
| 1.454  | 1.857  | 1.731  | 2.085  |
| 0.726  | 1.372  | -0.933 | 2.232  |
| 0.552  | 0.128  | 1.169  | -0.017 |
| -1.264 | -1.487 | -2.090 | -1.435 |
| -1.861 | -0.349 | -0.496 | -0.661 |
| 0.841  | 1.065  | 0.813  | 0.556  |
| 1.120  | 1.188  | 1.089  | 1.526  |
| 3.493  | 2.118  | 2.659  | 2.354  |
| -0.262 | -0.079 | -0.282 | 0.078  |
| 2.404  | 2.307  | 3.008  | 2.495  |
| 1.301  | 1.010  | 1.626  | 1.007  |
| -1.463 | -0.229 | -0.508 | -0.201 |
| -1.911 | -1.749 | -1.165 | -2.000 |
| 1.328  | 0.627  | 1.021  | 0.466  |
| -2.047 | -1.500 | -2.057 | -1.936 |
| -0.668 | -0.052 | -1.100 | 0.199  |
| -3.324 | -2.399 | -3.871 | -2.673 |
| -0.304 | -1.025 | -0.179 | -1.148 |
| 1.638  | 1.506  | 0.738  | 2.083  |
| 0.327  | 0.293  | -0.021 | 0.547  |
| 1.550  | 2.114  | 1.910  | 2.321  |
| 0.154  | -1.160 | -0.089 | -1.001 |
| -1.946 | -1.441 | -1.403 | -1.581 |
| -2.743 | -2.539 | -2.924 | -2.659 |
| -0.617 | -1.256 | -1.804 | -1.042 |
| -3.461 | -3.924 | -2.510 | -4.787 |
| 2.751  | 2.158  | 2.342  | 2.041  |
| 0.842  | 0.529  | 0.058  | -0.018 |
| -1.079 | -0.897 | -1.779 | -1.076 |
| 0.223  | 1.094  | -0.171 | 1.686  |
| 2.287  | 2.803  | 2.759  | 3.537  |
| 2.094  | 2.127  | 2.312  | 2.444  |
| -3.188 | -2.894 | -3.908 | -3.112 |
| 0.015  | -0.642 | -0.722 | -0.563 |
| -1.372 | -1.233 | -0.743 | -1.037 |
| -1.754 | -2.117 | -2.323 | -2.699 |
| -0.561 | -0.445 | -0.747 | -0.786 |
| -0.030 | -0.295 | 0.226  | -0.732 |
| -1.147 | -0.716 | -0.716 | -0.753 |
| -0.216 | -1.367 | -0.402 | -1.670 |

|        |        |        |        |
|--------|--------|--------|--------|
| -5.287 | -4.525 | -4.148 | -5.910 |
| -0.489 | -2.212 | -0.360 | -2.890 |
| 1.395  | 0.479  | 1.641  | 1.281  |
| -0.355 | 1.122  | -0.304 | 1.852  |
| 0.516  | -0.708 | -1.842 | -0.366 |
| 1.135  | 1.341  | 1.030  | 1.274  |
| 0.981  | 1.574  | 1.147  | 2.432  |
| 5.036  | 3.053  | 4.057  | 3.639  |
| -1.996 | -0.908 | -2.251 | -1.200 |
| 0.564  | 0.222  | 0.598  | 0.171  |
| -1.346 | -1.447 | -1.069 | -1.898 |
| -2.132 | -1.873 | -1.563 | -2.399 |
| 0.518  | -0.414 | 0.200  | -0.796 |
| -1.101 | -0.609 | -1.516 | -0.653 |
| -1.386 | -0.178 | -0.797 | 0.307  |
| -0.241 | -0.903 | 0.627  | -0.981 |
| 3.274  | 2.287  | 3.896  | 2.231  |
| -0.828 | -0.084 | -0.368 | -0.060 |
| -2.173 | -0.706 | -1.440 | -0.467 |
| 0.560  | 1.087  | 0.397  | 1.573  |
| -0.160 | 1.241  | -0.791 | 1.702  |
| -0.850 | -1.990 | -2.538 | -1.476 |
| 1.121  | 2.501  | 2.717  | 2.349  |
| 3.321  | 2.608  | 3.525  | 3.145  |
| 0.676  | -0.724 | 1.029  | -0.274 |
| -1.527 | -1.696 | -1.793 | -1.793 |
| -1.676 | -0.735 | -1.397 | -0.456 |
| 1.318  | 2.291  | 1.110  | 2.889  |
| 1.101  | -1.228 | 0.523  | -1.494 |
| -3.676 | -1.531 | -2.751 | -1.782 |
| 6.339  | 5.708  | 6.166  | 6.860  |
| 2.022  | 1.889  | 2.413  | 1.760  |
| -0.472 | 1.212  | -0.603 | 1.930  |
| 1.191  | -0.465 | 0.487  | -1.904 |
| 3.150  | 3.519  | 3.441  | 4.943  |
| 1.154  | 2.775  | 1.786  | 3.527  |
| -0.660 | -0.530 | -0.337 | -1.036 |
| 0.604  | 0.249  | -0.087 | 0.259  |
| -0.900 | -0.723 | 0.351  | -1.814 |
| -1.180 | -1.402 | -1.625 | -2.390 |
| 1.391  | 0.500  | 1.615  | 0.318  |
| -1.391 | -1.010 | -1.130 | -0.967 |
| 1.109  | 1.773  | 0.981  | 2.210  |
| 2.706  | 1.234  | 2.252  | 1.529  |
| -0.483 | 0.209  | -0.446 | 0.225  |
| -0.097 | -1.041 | 0.055  | -1.726 |
| 0.042  | 0.884  | -0.164 | 0.992  |

|        |        |        |        |
|--------|--------|--------|--------|
| 1.864  | 2.136  | 2.098  | 2.459  |
| -2.017 | -0.628 | -6.192 | -0.582 |
| -0.779 | 0.212  | -0.011 | 0.316  |
| 1.442  | 0.128  | 1.955  | -0.870 |
| 0.289  | -1.386 | 0.282  | -2.091 |
| 1.296  | 0.492  | 0.776  | -0.167 |
| 0.514  | 0.548  | 0.259  | 0.545  |
| -0.690 | -0.251 | -1.177 | -0.286 |
| -1.905 | -1.283 | -1.824 | -1.570 |
| 3.440  | 2.697  | 3.352  | 2.822  |
| -2.463 | 0.266  | -1.028 | -0.211 |
| -2.736 | -4.568 | -3.377 | -5.952 |
| -1.447 | -0.572 | -1.430 | -0.574 |
| 2.553  | 0.889  | 3.600  | 1.621  |
| -0.405 | -1.693 | -0.313 | -1.738 |
| 2.076  | 2.842  | 1.768  | 3.687  |
| -0.936 | -0.985 | -0.593 | -1.510 |
| 1.387  | 0.991  | 1.611  | 1.248  |
| -1.387 | -0.307 | -1.695 | -0.072 |
| 1.387  | 0.026  | 1.115  | -0.179 |
| 0.395  | 0.900  | 0.799  | 1.361  |
| -2.127 | -1.090 | -1.635 | -1.152 |
| 2.032  | 0.895  | 2.211  | 0.410  |
| -0.014 | 1.254  | 0.805  | 2.031  |
| -0.833 | -0.968 | -1.712 | -0.569 |
| 1.874  | 1.685  | 1.584  | 2.553  |
| 2.812  | 2.444  | 3.675  | 2.516  |
| -0.393 | -0.480 | -0.944 | 0.311  |
| 0.315  | -0.213 | 0.693  | 0.561  |
| 1.107  | 1.573  | 1.369  | 1.839  |
| 1.197  | 1.810  | 1.309  | 2.032  |
| -3.568 | -1.791 | -2.943 | -2.138 |
| 0.582  | 0.603  | 1.124  | 0.829  |
| -2.644 | -1.314 | -2.473 | -1.530 |
| 0.014  | 1.321  | 0.815  | 1.520  |
| 0.862  | 0.690  | 1.010  | 0.587  |
| -0.930 | 0.571  | -0.326 | 0.297  |
| -0.380 | 0.266  | -0.477 | -0.038 |
| -0.942 | 0.181  | 0.386  | 0.486  |
| -0.371 | -0.495 | 0.160  | -0.724 |
| -0.483 | -1.298 | -1.435 | -1.563 |
| -1.183 | -0.609 | -1.305 | -0.227 |
| 1.722  | 0.909  | 2.371  | 0.556  |
| 2.192  | -0.355 | 1.378  | -0.543 |
| -1.903 | -2.084 | -2.074 | -2.768 |
| -2.586 | -2.366 | -2.489 | -3.288 |
| 0.911  | 1.548  | 0.256  | 1.568  |

|        |        |        |        |
|--------|--------|--------|--------|
| -1.179 | 0.057  | -0.975 | -0.094 |
| -0.638 | 0.196  | 0.272  | -0.627 |
| -2.402 | -1.294 | -2.342 | -1.411 |
| 1.746  | -0.032 | 1.520  | 0.325  |
| -1.006 | -0.096 | -0.535 | 0.413  |
| -2.710 | -0.841 | -1.612 | -0.999 |
| -0.119 | -0.433 | -0.150 | -0.568 |
| -0.447 | -0.780 | -0.382 | -1.264 |
| -2.113 | -1.678 | -1.988 | -1.253 |
| -1.630 | -0.867 | -0.190 | -1.269 |
| 1.079  | 0.167  | 0.816  | -0.029 |
| -2.123 | -1.278 | -3.046 | -1.393 |
| 0.219  | 1.785  | 0.622  | 2.302  |
| 0.063  | 0.702  | 0.702  | 0.610  |
| 1.842  | 2.098  | 2.399  | 2.310  |
| -0.909 | -1.132 | -1.555 | -0.545 |
| 1.001  | 1.022  | 0.427  | 1.566  |
| -0.676 | -0.702 | 0.247  | -0.689 |
| -2.152 | -2.937 | -2.056 | -3.530 |
| 0.268  | -1.012 | -0.934 | -0.960 |
| -0.757 | -1.263 | -0.446 | -1.897 |
| 2.332  | -0.599 | 0.908  | -0.546 |
| 1.596  | -0.187 | -0.297 | 0.657  |
| -2.170 | 0.256  | -1.201 | 0.422  |
| -2.649 | -4.188 | -3.425 | -4.576 |
| -0.561 | 0.553  | 0.111  | 0.856  |
| 0.768  | 0.136  | -0.235 | 0.676  |
| 0.921  | 1.947  | 0.373  | 2.179  |
| -0.190 | 0.133  | -0.238 | 0.098  |
| 1.649  | 1.121  | 2.675  | 0.551  |
| 1.438  | 1.628  | 2.722  | 1.304  |
| -1.080 | -0.807 | -1.413 | -0.599 |
| 0.093  | 0.746  | -0.444 | 0.915  |
| 2.041  | 1.811  | 2.493  | 2.419  |
| 0.379  | 1.013  | 0.714  | 1.082  |
| 1.353  | 1.650  | 1.208  | 1.951  |
| -0.915 | 0.026  | -0.302 | 0.315  |
| 0.391  | 1.725  | 0.487  | 1.760  |
| 1.563  | 0.313  | 0.935  | 0.435  |
| -1.159 | -0.763 | -1.532 | -0.663 |
| -0.705 | -0.957 | -0.737 | -0.954 |
| -1.272 | -0.796 | -1.502 | -0.815 |
| 2.007  | 1.579  | 1.214  | 1.875  |
| 0.030  | -0.084 | -0.267 | 0.143  |
| 2.784  | 3.237  | 2.550  | 2.954  |
| -1.169 | -0.488 | -0.409 | -0.679 |
| -0.901 | -0.636 | -1.020 | -0.823 |

|        |        |        |        |
|--------|--------|--------|--------|
| 3.426  | 0.202  | 1.221  | 0.817  |
| -1.255 | -1.461 | -0.719 | -1.821 |
| 1.140  | -0.507 | 1.026  | -0.837 |
| -1.474 | -1.614 | -1.439 | -1.964 |
| 0.247  | -0.380 | -0.315 | -0.372 |
| -1.655 | -1.527 | -1.792 | -1.916 |
| 0.074  | 0.386  | 0.828  | 0.503  |
| 0.427  | 0.892  | 0.620  | 0.809  |
| 0.571  | 0.131  | 0.545  | -0.014 |
| -0.190 | 0.177  | -0.172 | 0.241  |
| -1.668 | -1.406 | -2.043 | -1.571 |
| 1.960  | 0.438  | 1.462  | 0.623  |
| 0.437  | 0.020  | -1.188 | 0.281  |
| -0.481 | 1.777  | 0.269  | 2.418  |
| 1.406  | 0.829  | 0.926  | 0.660  |
| -3.352 | -1.795 | -2.811 | -1.856 |
| -1.757 | -0.923 | -2.133 | -1.223 |
| -3.437 | -3.368 | -3.350 | -4.013 |
| 0.016  | 0.034  | -0.012 | -0.084 |
| 0.874  | 1.610  | 1.595  | 1.854  |
| -0.764 | -0.771 | -0.293 | -1.380 |
| -0.976 | -0.170 | -1.134 | -0.560 |
| -2.061 | -1.487 | -1.849 | -1.033 |
| 0.338  | 0.262  | 0.219  | 0.326  |
| 0.801  | 0.693  | 1.454  | 0.551  |
| -0.833 | -0.941 | -0.782 | -0.984 |
| -0.290 | -1.146 | -0.629 | -1.639 |
| -2.154 | -2.282 | -2.874 | -2.618 |
| -0.231 | 0.868  | 0.143  | 0.787  |
| -0.997 | -1.377 | -2.356 | -1.896 |
| 0.732  | -0.844 | -0.054 | -0.778 |
| 1.758  | 2.468  | 2.426  | 2.949  |
| 0.924  | 2.588  | 1.990  | 3.176  |
| 0.724  | -0.096 | 1.448  | -0.083 |
| -0.837 | 0.762  | 0.326  | 0.914  |
| 2.031  | 0.539  | 2.140  | 0.671  |
| 0.111  | 0.820  | 1.237  | 0.673  |
| 0.678  | 0.585  | 1.582  | 0.579  |
| -0.725 | -0.822 | -0.389 | -0.618 |
| 1.896  | 1.203  | 1.685  | 1.461  |
| 1.907  | 0.726  | 1.921  | 0.408  |
| -0.780 | 1.082  | 0.660  | 0.710  |
| 0.917  | 0.784  | 0.952  | 0.814  |
| -3.813 | -1.694 | -2.725 | -2.111 |
| -2.188 | -0.664 | -1.504 | -0.602 |
| -1.710 | -1.451 | -1.455 | -1.962 |
| -1.606 | -1.396 | -2.596 | -1.929 |

|        |        |        |        |
|--------|--------|--------|--------|
| -0.084 | 0.342  | 0.344  | 0.422  |
| -0.704 | 0.457  | 1.336  | 0.254  |
| -1.355 | -0.635 | -0.587 | -0.790 |
| -0.154 | 0.000  | -0.468 | 0.283  |
| 0.102  | 1.069  | 0.991  | 1.281  |
| 1.406  | 0.372  | 0.788  | 0.826  |
| -0.523 | 0.115  | -0.568 | 0.158  |
| -3.863 | -2.998 | -3.867 | -3.210 |
| 1.795  | 1.544  | 1.962  | 1.791  |
| -0.381 | 0.621  | -0.454 | 0.703  |
| 2.449  | 1.485  | 2.397  | 1.774  |
| 3.996  | 3.210  | 4.389  | 3.429  |
| 1.740  | 1.966  | 2.270  | 2.145  |
| 0.128  | -0.497 | -0.156 | -0.702 |
| 0.048  | -0.532 | 0.064  | -0.804 |
| 1.864  | 1.195  | 1.503  | 1.357  |
| -1.054 | 0.190  | -0.675 | 0.332  |
| -0.412 | -0.744 | -0.668 | -0.639 |
| -0.494 | -0.666 | -0.299 | -0.851 |
| 0.668  | 0.468  | 1.277  | 0.586  |
| 1.401  | 1.606  | 1.725  | 1.931  |
| -0.156 | 0.189  | -0.197 | 0.480  |
| 0.235  | -0.107 | 0.834  | -0.476 |
| 1.149  | 0.370  | 1.336  | 0.199  |
| -0.480 | 1.091  | -0.370 | 1.260  |
| -3.441 | -1.745 | -2.946 | -1.804 |
| -3.680 | -3.284 | -4.698 | -3.681 |
| -1.426 | -0.313 | -0.807 | -0.245 |
| 0.925  | 0.788  | 2.191  | 0.908  |
| -1.383 | -0.742 | -1.612 | -0.810 |
| -1.799 | -1.475 | -1.601 | -1.675 |
| -0.121 | 0.099  | -0.015 | 0.209  |
| 2.208  | 0.891  | 2.826  | 1.136  |
| -1.553 | -0.322 | -1.815 | -0.096 |
| -2.967 | -1.822 | -2.283 | -1.943 |
| -0.622 | -1.856 | -0.897 | -2.452 |
| -0.841 | -0.782 | -0.226 | -0.921 |
| -0.939 | -0.387 | -1.047 | -0.464 |
| -1.278 | -0.701 | -1.226 | -0.726 |
| -0.092 | 0.694  | 0.772  | 0.820  |
| 0.915  | 0.352  | 0.705  | 0.463  |
| 3.245  | 1.478  | 2.954  | 1.587  |
| -0.495 | -0.860 | -0.582 | -1.069 |
| -0.373 | -0.826 | -0.571 | -0.663 |
| 1.642  | 2.058  | 1.937  | 1.973  |
| -0.421 | 1.097  | 0.193  | 1.390  |
| 0.456  | 0.361  | 0.096  | 0.149  |

|        |        |        |        |
|--------|--------|--------|--------|
| -3.382 | -0.770 | -3.105 | -1.063 |
| 0.307  | 0.757  | 0.709  | 1.164  |
| -3.153 | -2.021 | -2.510 | -2.292 |
| -0.149 | 0.048  | -0.480 | -0.225 |
| -0.430 | -1.156 | -1.078 | -1.434 |
| 0.951  | 0.089  | 1.406  | 0.123  |
| 1.236  | 1.026  | 1.451  | 1.158  |
| -0.441 | -0.191 | -0.427 | -0.063 |
| 0.624  | -0.458 | -0.332 | -0.594 |
| 1.164  | 1.070  | -0.295 | 1.504  |
| 1.097  | 0.250  | -1.023 | 0.510  |
| -0.448 | -0.318 | -0.429 | -0.578 |
| 0.412  | -0.558 | 0.448  | -0.730 |
| 2.369  | 0.693  | 2.827  | 0.669  |
| -2.638 | -2.344 | -2.843 | -2.640 |
| 0.448  | 0.670  | 0.980  | 0.661  |
| -0.358 | -0.034 | -0.452 | 0.133  |
| -1.136 | -1.115 | -1.799 | -1.146 |
| -2.645 | -1.058 | -1.384 | -0.641 |
| 0.260  | 0.457  | 0.538  | 0.483  |
| 0.685  | 1.004  | 0.770  | 1.232  |
| -3.815 | -2.993 | -3.566 | -3.565 |
| -1.583 | -1.295 | -1.185 | -2.003 |
| -0.742 | -1.151 | -0.590 | -1.732 |
| 0.255  | 0.592  | -0.038 | 0.270  |
| 1.283  | 1.173  | 1.350  | 1.258  |
| 1.666  | 0.817  | 0.124  | 1.456  |
| 4.910  | 2.378  | 4.952  | 2.380  |
| 1.667  | 0.958  | 1.863  | 1.274  |
| 0.195  | -1.342 | -1.353 | -1.869 |
| 1.322  | 0.210  | -0.542 | -0.041 |
| 1.132  | 1.021  | 1.108  | 1.100  |
| 0.156  | 0.476  | 0.082  | 0.065  |
| -2.503 | -0.989 | -2.884 | -0.924 |
| -1.933 | -1.111 | -1.346 | -0.941 |
| 1.933  | -0.444 | 0.057  | -0.599 |
| -1.356 | -0.680 | 0.065  | -0.926 |
| -1.266 | 0.135  | -0.422 | 0.587  |
| -0.566 | -0.784 | -0.661 | -1.129 |
| 0.911  | -0.394 | 0.160  | -0.578 |
| 0.199  | 0.637  | 0.110  | 0.621  |
| 0.667  | -1.822 | 0.570  | -2.168 |
| -1.449 | -2.063 | -0.098 | -2.358 |
| -0.183 | -0.022 | 0.677  | 0.467  |
| 1.649  | 2.513  | 3.469  | 3.131  |
| 3.376  | 3.204  | 3.571  | 3.387  |
| 1.055  | -0.126 | 0.117  | -1.098 |

|        |        |        |        |
|--------|--------|--------|--------|
| -3.109 | -1.784 | -2.961 | -2.550 |
| 1.129  | -0.093 | 0.871  | -1.146 |
| -1.200 | 0.456  | -0.922 | 0.222  |
| -3.046 | -1.781 | -1.889 | -1.942 |
| 0.165  | -0.392 | 0.118  | -0.127 |
| 3.395  | 2.726  | 4.187  | 3.595  |
| 1.176  | 2.052  | 3.040  | 1.919  |
| -0.525 | -1.214 | -2.523 | -1.912 |
| -0.493 | 0.497  | -0.354 | 0.931  |
| -0.106 | 0.682  | 0.245  | 0.204  |
| -0.780 | 0.062  | -0.730 | -0.121 |
| -0.053 | -0.696 | -1.522 | -1.079 |
| 0.798  | 1.331  | 1.636  | 1.239  |
| 1.281  | 0.454  | 0.303  | -0.090 |
| 1.643  | 1.043  | 0.745  | 1.559  |
| 0.479  | -0.041 | 0.079  | -0.078 |
| -1.600 | -0.143 | -1.709 | -0.201 |
| 1.292  | 1.182  | 1.216  | 1.501  |
| -1.570 | -0.688 | -0.427 | -0.491 |
| -1.631 | -1.774 | -1.559 | -2.284 |
| 0.617  | -0.462 | 0.880  | -0.169 |
| -0.281 | -0.492 | -0.964 | -0.755 |
| -0.247 | -0.132 | -0.795 | -0.080 |
| -0.905 | -1.261 | -0.486 | -1.527 |
| -0.715 | -1.091 | -1.010 | -1.353 |
| -0.612 | 1.541  | 0.055  | 1.595  |
| 9.454  | 4.339  | 8.025  | 5.523  |
| -0.033 | -0.195 | 0.047  | -0.072 |
| -1.892 | -0.540 | -3.612 | -0.723 |
| 2.498  | 1.671  | 2.294  | 2.331  |
| 0.294  | -0.695 | 0.627  | -0.457 |
| 0.455  | 0.361  | 0.317  | 0.754  |
| -0.520 | -0.643 | -2.414 | -0.358 |
| -0.703 | -0.182 | -0.798 | 0.158  |
| 3.310  | 2.086  | 4.617  | 2.139  |
| -2.086 | -0.688 | -1.039 | -1.035 |
| 0.356  | -0.080 | 1.619  | -0.089 |
| -2.769 | -0.319 | -2.908 | -1.195 |
| -3.602 | -0.401 | -2.908 | -0.950 |
| -0.605 | -0.114 | 0.129  | -0.502 |
| 0.691  | 0.000  | 0.558  | 0.215  |
| -0.656 | -0.047 | -0.162 | -0.154 |
| -0.748 | -0.740 | -0.646 | -0.824 |
| 0.279  | 0.088  | -0.494 | 0.405  |
| 0.156  | 0.148  | 0.478  | -0.015 |
| 1.722  | 1.551  | 1.197  | 1.921  |
| -2.472 | -1.094 | -3.920 | -1.943 |

|        |        |        |        |
|--------|--------|--------|--------|
| -1.998 | -2.630 | -2.727 | -2.925 |
| 1.225  | 0.618  | 1.674  | 0.761  |
| 0.458  | 0.027  | 0.138  | -0.264 |
| -0.088 | -0.631 | -1.392 | -1.087 |
| 1.327  | 1.605  | 1.914  | 1.646  |
| 2.382  | 0.709  | 2.356  | 1.259  |
| -0.612 | 0.208  | -0.340 | 0.300  |
| 1.371  | 0.802  | 1.976  | 0.766  |
| -1.439 | 0.439  | -1.651 | -0.985 |
| 0.510  | 0.786  | 0.206  | 0.177  |
| 0.760  | -0.587 | 1.441  | -0.199 |
| 0.805  | -0.232 | 0.277  | -0.341 |
| -2.640 | -0.666 | -1.741 | -0.724 |
| -1.852 | -2.879 | -1.312 | -2.744 |
| 0.922  | 0.855  | 1.840  | 1.455  |
| -0.712 | 0.197  | -0.513 | -0.178 |
| -1.847 | 0.265  | -1.424 | -0.435 |
| -1.737 | -0.763 | -0.706 | -1.346 |
| 0.559  | 1.108  | 0.640  | 1.123  |
| -1.484 | -2.456 | -1.763 | -2.594 |
| 0.200  | 0.256  | 0.436  | 0.154  |
| 1.821  | 1.161  | 0.606  | 1.792  |
| 0.641  | 0.728  | 0.958  | 0.706  |
| -0.267 | -0.954 | -0.981 | -1.099 |
| -1.200 | -0.068 | 0.307  | -0.446 |
| -0.778 | -0.041 | -0.198 | -0.514 |
| -0.273 | -0.034 | -1.324 | -0.133 |
| -0.951 | -2.162 | -0.637 | -0.931 |
| 0.751  | 0.997  | 0.755  | 1.129  |
| -1.563 | -0.990 | -2.267 | -0.729 |
| 1.599  | 0.691  | 1.086  | 1.167  |
| 0.018  | 1.052  | 0.774  | 1.417  |
| 0.944  | 1.286  | 0.359  | 1.041  |
| 1.274  | -0.190 | -0.201 | -0.687 |
| 1.469  | -3.937 | 2.634  | 1.941  |
| 1.171  | 0.466  | 0.042  | 0.398  |
| 0.520  | 0.674  | 0.269  | 0.698  |
| 0.104  | 0.788  | 0.257  | -0.654 |
| -1.548 | -0.508 | -0.571 | -0.411 |
| 2.322  | 2.080  | 1.542  | 2.292  |
| -2.217 | -0.507 | -2.093 | -0.558 |
| -2.285 | 0.651  | -1.097 | 0.206  |
| -2.357 | -0.878 | -1.986 | -0.977 |
| -0.773 | -0.663 | -0.320 | -0.218 |
| 2.717  | 1.179  | 1.718  | 1.538  |
| 0.018  | 0.219  | -0.224 | 0.796  |
| 2.083  | -0.638 | 0.213  | -0.655 |

|        |        |        |        |
|--------|--------|--------|--------|
| 0.457  | 0.686  | 0.377  | 1.035  |
| -0.404 | -0.651 | 0.016  | -0.551 |
| 0.035  | 1.373  | 1.025  | 1.256  |
| 0.806  | 1.040  | 0.387  | 1.481  |
| -0.140 | 0.288  | -0.201 | 0.053  |
| 1.802  | 0.687  | 0.932  | 1.130  |
| -0.172 | 1.019  | -0.296 | 1.065  |
| 2.799  | 1.503  | 2.342  | 1.870  |
| -1.347 | -0.299 | -0.959 | -0.513 |
| 1.481  | 1.022  | 1.034  | 1.434  |
| 2.067  | 1.590  | 1.357  | 1.698  |
| -1.301 | -0.661 | -1.636 | -0.881 |
| 0.314  | -0.134 | -0.294 | -0.166 |
| 1.704  | -0.840 | -1.250 | -0.273 |
| -2.601 | -1.055 | -1.670 | -1.529 |
| -2.328 | -1.126 | -1.932 | -1.877 |
| 0.799  | -0.376 | -0.592 | 0.219  |
| -0.424 | 0.816  | -0.032 | 0.498  |
| -0.068 | -0.217 | 0.052  | -0.411 |
| -2.272 | -0.494 | 0.239  | -0.909 |
| -1.279 | -0.192 | 0.694  | 0.063  |
| 0.088  | 0.073  | 0.032  | 0.235  |
| -0.070 | 0.882  | -0.004 | 0.798  |
| 1.903  | 3.159  | 3.056  | 2.942  |
| 2.544  | 1.199  | 2.493  | 1.829  |
| -3.239 | -2.992 | -1.415 | -3.036 |
| 0.953  | 0.329  | 1.126  | 0.344  |
| -0.571 | 0.514  | 0.153  | 0.480  |
| 0.915  | 2.149  | 1.097  | 2.352  |
| 1.383  | 0.812  | 0.895  | 1.102  |
| -0.289 | 1.494  | 0.040  | 1.546  |
| -0.614 | -0.825 | -0.566 | -0.616 |
| 1.275  | 0.953  | 1.063  | 0.823  |
| 2.073  | 0.744  | 1.319  | 1.002  |
| 0.922  | 0.188  | 1.263  | 0.099  |
| -0.889 | 1.169  | -0.936 | 0.954  |
| 1.640  | 0.054  | 1.640  | 0.357  |
| -0.147 | 0.239  | 0.892  | 0.405  |
| 0.908  | 1.553  | -0.052 | 1.586  |
| 0.996  | 1.176  | 0.461  | 1.441  |
| 0.271  | 0.412  | 0.815  | 0.365  |
| -1.753 | -3.309 | -1.472 | -3.440 |
| -2.680 | -2.356 | -2.187 | -2.565 |
| 0.896  | 0.739  | 0.554  | 0.774  |
| 0.297  | 1.731  | -0.068 | 1.678  |
| -0.595 | -1.488 | -0.669 | -1.576 |
| -2.618 | -0.542 | -3.631 | -0.498 |

|        |        |        |        |
|--------|--------|--------|--------|
| -1.958 | -0.355 | -1.925 | -0.340 |
| 1.087  | 0.391  | 3.385  | 0.406  |
| -2.677 | -2.827 | -2.084 | -3.008 |
| -0.814 | 0.232  | -2.017 | 0.158  |
| 0.972  | 0.736  | 0.138  | 0.815  |
| -0.494 | -1.660 | 0.252  | -1.756 |
| -0.443 | 0.567  | 0.129  | 0.922  |
| -0.445 | -1.067 | 0.527  | -1.460 |
| 2.153  | 0.954  | 2.772  | 1.114  |
| -2.833 | -1.578 | -0.468 | -1.699 |
| -0.468 | 0.236  | 1.686  | 0.232  |
| 0.647  | -0.300 | 0.764  | -0.394 |
| 3.678  | 2.182  | 5.588  | 2.541  |
| 2.525  | 1.045  | 0.633  | 1.174  |
| 0.236  | -0.789 | 0.342  | -0.755 |
| 0.101  | 0.820  | -1.077 | 0.848  |
| -0.877 | -0.453 | -1.161 | -0.947 |
| -0.646 | 0.589  | -0.951 | 0.434  |
| -0.770 | -0.614 | -1.848 | -0.581 |
| 1.179  | 0.335  | 2.716  | 0.162  |
| -0.442 | -0.298 | 0.442  | -0.227 |
| -1.998 | -0.505 | -3.009 | -0.434 |
| 3.958  | 2.882  | 3.359  | 3.434  |
| 1.823  | 0.653  | 0.616  | 0.168  |
| -0.214 | 0.006  | 0.879  | -0.182 |
| -0.429 | 0.066  | -0.512 | 0.106  |
| 0.462  | 0.936  | -0.330 | 1.312  |
| 1.015  | 1.921  | 1.656  | 2.415  |
| 0.098  | 1.303  | 0.565  | 1.379  |
| -0.375 | -1.040 | -0.676 | -1.060 |
| 1.169  | -0.416 | -0.208 | -0.401 |
| -1.545 | -1.156 | -2.141 | -1.535 |
| 0.507  | -1.152 | 0.507  | -1.502 |
| -1.165 | -0.620 | -1.086 | -0.808 |
| -0.083 | 0.211  | 0.641  | 0.082  |
| 0.264  | -0.708 | -0.106 | -1.094 |
| 1.423  | -0.158 | 0.439  | -0.251 |
| -0.979 | -0.787 | -0.024 | -1.511 |
| 0.572  | 0.702  | 0.757  | 0.773  |
| -1.082 | -0.531 | -1.451 | -0.913 |
| 0.804  | 0.165  | 1.420  | 0.095  |
| 3.534  | 2.318  | 2.920  | 2.824  |
| -1.591 | -1.867 | -0.789 | -2.183 |
| -1.649 | -2.399 | -2.261 | -3.484 |
| -3.247 | -2.656 | -2.963 | -2.872 |
| 0.084  | -1.345 | 0.021  | -1.974 |
| 1.088  | 0.311  | 1.954  | 0.684  |

|        |        |        |        |
|--------|--------|--------|--------|
| -0.987 | 0.541  | 0.353  | 0.416  |
| 0.319  | 0.583  | 0.342  | 0.648  |
| -0.892 | 1.307  | 0.164  | 1.470  |
| 0.708  | 0.403  | 0.939  | 0.693  |
| 1.582  | 0.838  | 1.511  | 0.777  |
| 0.429  | 1.869  | 1.311  | 1.944  |
| 1.470  | 1.203  | 1.763  | 1.510  |
| 2.229  | 1.576  | 1.897  | 1.799  |
| 0.332  | 0.018  | -0.826 | -0.278 |
| -0.937 | 0.734  | 0.201  | 0.945  |
| -1.786 | -0.841 | -1.336 | -1.342 |
| 0.793  | 1.559  | 2.328  | 1.872  |
| -0.760 | 0.782  | 0.161  | 1.185  |
| 0.292  | -0.204 | 0.355  | -0.373 |
| -1.320 | -1.455 | -0.869 | -1.770 |
| 0.507  | 0.159  | 0.690  | 0.265  |
| -1.795 | -0.177 | -0.763 | -0.229 |
| -2.268 | -4.225 | -3.475 | -5.733 |
| 0.221  | -0.637 | 0.790  | -1.154 |
| 0.743  | 0.674  | 0.919  | 0.717  |
| -1.253 | -1.403 | -1.134 | -1.820 |
| -0.890 | -0.332 | -0.598 | -0.476 |
| 0.275  | 1.048  | 0.455  | 1.553  |
| -1.156 | 0.167  | -1.317 | 0.568  |
| 2.111  | 3.153  | 1.536  | 4.178  |
| 2.880  | 1.448  | 1.152  | 1.873  |
| 1.067  | 0.242  | 0.475  | 0.484  |
| 1.411  | 0.858  | 1.611  | 1.121  |
| -0.048 | -0.100 | 0.230  | -0.342 |
| 1.471  | 2.322  | 1.727  | 2.511  |
| 0.428  | 0.120  | 0.219  | -0.240 |
| 2.698  | 0.848  | 2.666  | 1.315  |
| -0.139 | 1.223  | -0.150 | 1.832  |
| 1.498  | 0.703  | 1.815  | 0.425  |
| 0.876  | 1.769  | 1.250  | 2.050  |
| 0.390  | 0.033  | 0.619  | 0.062  |
| -2.120 | -2.164 | -2.121 | -2.220 |
| 0.534  | 0.368  | -0.657 | 0.410  |
| -0.244 | -0.234 | 0.280  | 0.093  |
| -1.182 | -0.997 | -1.443 | -1.187 |
| 0.708  | 0.326  | 0.325  | 0.435  |
| -0.600 | -1.106 | 0.246  | -1.324 |
| -1.445 | -1.942 | -1.699 | -1.920 |
| -0.235 | -0.388 | -0.916 | -0.654 |
| 0.563  | 0.758  | 0.837  | 1.184  |
| 1.163  | 1.220  | 1.737  | 1.362  |
| -0.572 | -0.365 | -0.526 | -0.240 |

|        |        |        |        |
|--------|--------|--------|--------|
| -0.872 | -0.630 | -0.760 | -0.691 |
| 1.043  | 0.676  | 0.249  | 0.905  |
| 1.139  | 0.643  | -0.203 | 0.950  |
| 1.775  | 1.755  | 1.749  | 1.891  |
| 0.674  | 0.067  | -0.434 | 0.137  |
| 0.596  | 0.289  | 0.225  | 0.299  |
| -2.511 | -1.658 | -2.452 | -1.903 |
| 2.020  | 0.541  | 1.509  | 0.634  |
| 0.357  | -0.022 | 0.395  | 0.083  |
| 0.386  | -1.324 | 0.339  | -1.912 |
| 0.104  | -0.434 | -0.306 | -0.256 |
| -1.251 | -0.620 | -0.473 | -0.812 |
| -2.334 | -1.198 | -1.442 | -1.450 |
| 1.280  | 0.835  | 1.575  | 0.593  |
| 0.000  | -0.237 | 0.409  | -0.338 |
| 1.518  | 0.997  | 1.301  | 1.066  |
| -3.197 | -1.956 | -2.793 | -2.474 |
| 2.599  | 2.060  | 2.336  | 2.369  |
| -1.801 | -1.879 | -2.168 | -2.125 |
| -3.782 | -2.350 | -2.862 | -3.705 |
| -1.213 | -2.058 | -1.334 | -2.573 |
| -0.660 | -1.221 | -0.678 | -1.579 |
| -0.535 | -0.501 | -0.362 | -0.682 |
| 0.146  | -0.354 | -0.202 | -0.547 |
| 2.452  | 1.771  | 2.039  | 2.746  |
| 0.694  | 0.980  | 0.063  | 1.054  |
| 0.236  | -0.042 | 0.496  | -0.158 |
| 0.735  | 0.977  | 1.065  | 1.492  |
| -0.093 | -0.114 | -0.662 | 0.420  |
| -1.872 | -0.960 | -0.978 | -1.147 |
| 0.127  | -0.328 | 0.123  | -0.620 |
| -0.381 | 0.431  | -0.786 | 0.347  |
| -0.575 | 0.194  | 0.054  | 0.073  |
| -0.048 | -0.789 | 0.600  | -0.877 |
| 1.179  | 0.995  | 0.525  | 1.703  |
| 0.363  | 0.361  | 0.811  | 0.269  |
| -0.300 | 1.593  | 1.131  | 1.198  |
| -0.412 | -0.987 | 0.301  | -1.152 |
| 2.433  | 1.583  | 2.182  | 2.005  |
| -0.591 | -1.124 | -0.940 | -0.956 |
| 0.854  | 0.818  | 0.676  | 1.403  |
| -0.574 | -1.582 | -0.530 | -2.455 |
| -0.891 | -0.601 | -0.103 | -1.295 |
| 0.016  | -1.165 | 0.012  | -1.697 |
| -3.351 | -1.283 | -3.456 | -1.321 |
| 0.453  | -1.050 | 0.334  | -1.789 |
| -2.602 | -1.968 | -3.151 | -2.184 |

|        |        |        |        |
|--------|--------|--------|--------|
| 1.301  | 0.711  | 0.322  | 1.442  |
| -1.950 | -0.190 | -1.221 | -0.014 |
| -0.017 | -0.222 | -0.264 | -0.178 |
| -0.804 | -0.395 | -0.989 | -0.471 |
| 0.034  | 0.204  | 0.600  | 0.179  |
| -1.252 | -1.371 | -1.466 | -1.449 |
| 0.000  | 0.110  | -0.362 | -0.008 |
| 2.273  | 2.142  | 1.060  | 2.288  |
| 0.349  | 1.254  | 0.355  | 0.919  |
| 0.546  | 0.763  | 0.870  | 1.034  |
| 0.822  | -0.558 | -1.139 | -0.408 |
| -1.169 | -1.138 | -2.585 | -1.626 |
| 0.939  | -0.511 | -1.080 | -0.581 |
| -1.337 | -1.785 | -1.726 | -1.823 |
| 0.514  | 1.221  | 0.968  | 1.057  |
| 2.289  | 1.395  | 2.797  | 1.236  |
| 0.113  | -0.547 | -0.503 | -0.853 |
| 0.644  | 0.816  | 1.714  | 1.001  |
| 0.831  | 0.735  | 1.213  | 1.068  |
| 0.127  | 0.062  | -0.285 | -0.081 |
| -0.766 | -0.155 | -1.216 | -0.145 |
| 1.809  | 1.222  | 1.419  | 1.241  |
| -2.871 | -1.989 | -2.282 | -2.595 |
| 0.162  | -0.628 | 0.291  | -1.074 |
| 2.094  | 1.636  | 1.909  | 1.667  |
| 2.175  | 2.309  | 1.352  | 2.665  |
| -0.248 | -1.145 | -1.136 | -1.499 |
